# Supplementary material for: Contingency and chance erase necessity in the experimental evolution of ancestral proteins
Source: eLife. 2021 Jun 1;10:e67336. doi: 10.7554/eLife.67336 (PMC8282340; doi:10.7554/eLife.67336)
Supplement: Supplementary file 1. [file elife-67336-supp1.xlsx]

## Sheet: Fig 1 Lux Assay
	No Peptide			BID			NOXA								No Peptide avg	BID avg	NOXA avg		No Peptide Std Dev	BID std dev	NOXA std dev
No Protein	1.38193	0.113335	1.50506	0.916464	0.529804	0.92909	1.20462	0.121092	0.685555					No Protein	1.00011	0.791786	0.670422		0.770432	0.226971	0.541922
hsBCL-2	0.667273	1.48925	1.39015	32.7237	29.4354	23.8398	0.794193	0.061959	0.751756					hsBCL-2	1.18223	28.6663	0.535969		0.448707	4.49157	0.411053
hsMCL-1	2.00256	1.79589	1.76928	68.0733	78.6812	80.8081	16.9797	22.9791	23.7986					hsMCL-1	1.85591	75.8542	21.2525		0.127695	6.82187	3.72294

## Sheet: Fig 2 Lux Assays
	No Peptide			BID			NOXA								No Peptide avg	BID avg	NOXA avg		No Peptide Std Dev	BID std dev	NOXA std dev
No Protein	0.848435	0.544127	1.60756	1.22764	0.771305	0.193314	1.07089	1.513	0.333031					No Protein	1.00004	0.730753	0.972307		0.547688	0.518354	0.59613
hsBCL-2	0.564131	0.852742	0.900867	22.9078		25.0498	2.45754	2.16659	1.11602					hsBCL-2	0.77258	23.9788	1.91338		0.182119	1.51469	0.705694
AncBCL-O	0.964979	1.68028	0.754609	49.2692	48.8806	61.1404	6.54507	3.69209	4.9055					AncBCL-O	1.13329	53.0967	5.04756		0.485243	6.9687	1.43179
AncBCL-G	0.841424	0.98528	0.896235	53.5553	42.9994	48.2379	1.96722	1.85874	1.44463					AncBCL-G	0.907646	48.2642	1.75687		0.0726037	5.278	0.275787
AncB5	1.24405	0.717737	1.02039	23.9144	30.2288	42.7413	1.09424	1.11406	1.24364					AncB5	0.99406	32.2948	1.15064		0.264145	9.58198	0.0811389
AncB4	0.363615	1.55835	0.591392	22.2504	26.7513	23.8563	1.93314	2.99185	2.00585					AncB4	0.837786	24.286	2.31028		0.634335	2.28105	0.591374
AncB3	0.780946	0.803781	1.03789	31.5451	34.9774	31.7713	7.94136	6.75127	7.50908					AncB3	0.874206	32.7646	7.40057		0.142215	1.91969	0.602418
AncB2	0.564131	1.25421	0.478605	28.06	25.0044	24.045	10.4491	10.2889	20.1155					AncB2	0.765648	25.7031	13.6178		0.425261	2.09672	5.62772
AncB1	0.355159	0.352427	0.962006	36.3165	41.8246	37.5835	19.0898	21.2075	17.6943					AncB1	0.556531	38.5749	19.3305		0.351155	2.88477	1.76892
AncMB1_B	0.516231	0.735008	0.294498	41.1951	41.5855	43.8708	22.1472	25.8255	13.7447					AncMB1_B	0.515246	42.2171	20.5725		0.220257	1.44536	6.19249
AncMB1_M	1.89125	1.22682	1.50785	57.7253	63.1724	75.7255	19.4154	13.6165	14.7379					AncMB1_M	1.54197	65.5411	15.9232		0.333524	9.23093	3.0758
AncM1	0.040084	0.27064	0.560092	40.4411	44.3256	45.2186	19.8409	17.3519	16.5728					AncM1	0.290272	43.3284	17.9218		0.260559	2.54003	1.70698
AncM2	1.28237	1.17476	1.32947	31.4776	32.1947	34.9071	13.1133	13.8432	14.4424					AncM2	1.2622	32.8598	13.7996		0.0793032	1.8089	0.665625
AncM3	1.92951	1.26336	1.00655	47.1366	60.8837	77.0751	80.7226	73.215	38.1796					AncM3	1.39981	61.6985	64.0391		0.476365	14.9858	22.7074
AncM4	1.14641	1.1363	0.628623	8.71841	10.108	10.1213	25.9868	27.8877	49.1292					AncM4	0.970444	9.64924	34.3346		0.296069	0.806155	12.8478
AncM6	1.26485	0.491056	0.989109	142.537	108.234	105.615	30.4271	52.9907	42.0134					AncM6	0.915004	118.795	41.8104		0.392182	20.6028	11.2831
hsMCL-1	0.676868	0.579419	1.41033	44.5282	62.8619	51.4393	11.5259	12.5152	9.95746					hsMCL-1	0.888872	52.9431	11.3329		0.454215	9.25889	1.28975
	No Peptide				BID				NOXA						No Peptide avg	BID avg	NOXA avg		No Peptide Std Dev	BID std dev	NOXA std dev
No Protein	1.1159	1.01126	0.870881	1.00196	0.993449	0.394458	0.235016	0.713381	1.0275	0.35098	0.454458	0.481412		No Protein	1	0.584076	0.578587		0.100392	0.33769	0.304509
hsBCL-2	1.33475	0.376447	0.131796	0.303887	14.8226	18.1056	15.9441	15.1289	1.26308	1.16139	0.558815	0.78963		hsBCL-2	0.53672	16.0003	0.943229		0.541822	1.48119	0.327243
hsMCL-1	0.974082	0.53905	1.07397	0.956531	49.3872	54.9199	45.0596	30.4808	7.3916	6.26398	10.6088	16.4813		hsMCL-1	0.885909	44.9619	10.1864		0.236954	10.4635	4.58258
AncB4	0.64686	0.394974	0.724688	0.65005	22.2069	26.7383	22.4214	19.3025	1.56591	1.75807	1.34349	1.26049		AncB4	0.604143	22.6673	1.48199		0.144008	3.06414	0.224729
BCL-2-Hydra_magnapapillata	0.553543	0.460562	0.279408	0.488963	34.0094	35.8263	21.8295	16.8851	14.9508	14.1939	8.98575	12.2429		BCL-2-Hydra_magnapapillata	0.445619	27.1376	12.5933		0.117439	9.23771	2.66188
BCL-2-Saccoglossus_kowalevskii	0	0.464322	0.928779	0.642885	17.9911	15.262	8.80956	10.083	0.443113	0.385049	0.194183	0.251153		BCL-2-Saccoglossus_kowalevskii	0.508997	13.0364	0.318375		0.389537	4.32402	0.115394
BCL-2-Octopus_bimaculoides	1.24643	0.752251	0.828184	0.377979	53.4939	34.5413	24.2328	20.0791	1.96726	2.34577	2.33115	2.02439		BCL-2-Octopus_bimaculoides	0.801211	33.0868	2.16714		0.356122	14.9014	0.199283
BCL-2- Branchiostoma belcheri	0.871977	0.562074	1.45292	0.790776	5.68794	3.55407	4.06116	2.53048	0.586756	0.648111	0.201981	0.593741		BCL-2- Branchiostoma belcheri	0.919437	3.95841	0.507647		0.379086	1.31711	0.205615
	No Peptide			BID			NOXA								No Peptide avg	BID avg	NOXA avg		No Peptide Std Dev	BID std dev	NOXA std dev
No Protein	0.956458	0.731267	1.31296	0.777674	1.05249	0.559788	0.574255	1.04404	0					No Protein	1.00023	0.796651	0.539431		0.293304	0.246899	0.522889
hsBCL-2	1.19225	1.30611	1.06802	31.1517	38.3216	41.6778	1.50503	1.47837	1.39076					hsBCL-2	1.18879	37.0504	1.45805		0.119082	5.37698	0.0597827
AncB5	2.42909	2.26146	1.26433	37.4593	36.8553	35.933	2.72277	0	2.51174					AncB5	1.98496	36.7492	1.74484		0.629688	0.768679	1.51475
AncB4	2.81277	1.12872	0.718278	42.3647	40.6399	64.7443	5.42725	0.594342	4.10202					AncB4	1.55326	49.2496	3.37454		1.10991	13.4465	2.49723
AncB3	1.57657	1.34109	0.899534	56.3973	63.6835	74.1643	11.4128	11.6863	9.60928					AncB3	1.2724	64.7484	10.9028		0.343706	8.93122	1.12854
AncB2	0.581188	1.09	0.618965	73.749	62.3641	76.1206	24.23	21.224	25.7133					AncB2	0.763385	70.7446	23.7224		0.283488	7.35391	2.28732
AncMB1_B	1.95096	1.36053	0.920231	58.1153	69.8101	75.4063	38.0957	48.438	34.3756					AncMB1_B	1.41057	67.7773	40.3031		0.517183	8.82294	7.28645
AncMB1_M	1.83034	2.68698	0.829732	100.98	87.4443	101.698	20.8201	17.4503	24.3426					AncMB1_M	1.78235	96.7076	20.871		0.929554	8.03024	3.44647
hsMCL-1	1.44168	1.22265	0	80.6122	88.2765	83.9125	18.5557	24.6017	21.2611					hsMCL-1	0.888108	84.2671	21.4728		0.776882	3.84443	3.02856
BCL-2-Trichoplax_adhaerens	0.968214	0.113053	0.855853	2.23146	0	0.979154	0.255056	2.89429	0.728194					BCL-2-Trichoplax_adhaerens	0.645707	1.07021	1.29251		0.4647	1.11851	1.40721
BCL-2-Stegodyphus_mimosarum	0.64668	2.09073	1.91856	33.536	55.1442	34.9198	2.9437	1.25339	0.696025					BCL-2-Stegodyphus_mimosarum	1.55199	41.2	1.63104		0.788733	12.0958	1.17046
	No Peptide			BID			NOXA								No Peptide avg	BID avg	NOXA avg		No Peptide Std Dev	BID std dev	NOXA std dev
No Protein	0.848435	0.544127	1.60756	1.22764	0.771305	0.193314	1.07089	1.513	0.333031					No Protein	1.00004	0.730753	0.972307		0.547688	0.518354	0.59613
hsBCL-2	0.564131	0.852742	0.900867	22.9078		25.0498	2.45754	2.16659	1.11602					hsBCL-2	0.77258	23.9788	1.91338		0.182119	1.51469	0.705694
AncB5	1.24405	0.717737	1.02039	23.9144	30.2288	42.7413	1.09424	1.11406	1.24364					AncB5	0.99406	32.2948	1.15064		0.264145	9.58198	0.0811389
B5_alt	0.223272	0.889114	1.90155	55.5895	67.9334	67.218	0.923414	0.971354	2.45839					B5_alt	1.00465	63.5803	1.45105		0.845084	6.92946	0.872711
AncB4	0.363615	1.55835	0.591392	22.2504	26.7513	23.8563	1.93314	2.99185	2.00585					AncB4	0.837786	24.286	2.31028		0.634335	2.28105	0.591374
B4_alt	1.42064	0.585646	1.26679	64.7716	54.0855	60.0555	3.05437	4.03007	3.83226					B4_alt	1.09102	59.6375	3.6389		0.444378	5.35532	0.51579
AncB3	0.780946	0.803781	1.03789	31.5451	34.9774	31.7713	7.94136	6.75127	7.50908					AncB3	0.874206	32.7646	7.40057		0.142215	1.91969	0.602418
B3_alt	1.1648	1.88339	0.336055	33.6793	30.0825	37.9126	21.4312	18.1747	15.1511					B3_alt	1.12808	33.8915	18.2524		0.774321	3.91939	3.14076
AncB2	0.564131	1.25421	0.478605	28.06	25.0044	24.045	10.4491	10.2889	20.1155					AncB2	0.765648	25.7031	13.6178		0.425261	2.09672	5.62772
B2_alt	0.95449	1.30198	0.458155	53.1029	48.6301	52.7206	15.0922	18.0381	23.8895					B2_alt	0.904874	51.4845	19.0066		0.424093	2.47938	4.47793
AncB1	0.355159	0.352427	0.962006	36.3165	41.8246	37.5835	19.0898	21.2075	17.6943					AncB1	0.556531	38.5749	19.3305		0.351155	2.88477	1.76892
B1_alt	0.636327	0.385652	0.885324	31.3647	36.7759	39.1044	5.95075	7.24765	7.5561					B1_alt	0.635768	35.7483	6.91817		0.249836	3.97082	0.851884
AncMB1_B	0.516231	0.735008	0.294498	41.1951	41.5855	43.8708	22.1472	25.8255	13.7447					AncMB1_B	0.515246	42.2171	20.5725		0.220257	1.44536	6.19249
MB1_B_alt	0.998703	0.920494	1.31585	36.6769	37.8987	48.1168	5.83107	6.1927	6.0179					MB1_B_alt	1.07835	40.8975	6.01389		0.209366	6.28186	0.180852
AncMB1_M	1.89125	1.22682	1.50785	57.7253	63.1724	75.7255	19.4154	13.6165	14.7379					AncMB1_M	1.54197	65.5411	15.9232		0.333524	9.23093	3.0758
MB1_M_alt	1.41406	0.884766	1.4283	56.6996	75.4747	41.1607	3.70048	2.95404	3.85931					MB1_M_alt	1.24238	57.7783	3.50461		0.309781	17.1824	0.483375
AncM6	1.26485	0.491056	0.989109	142.537	108.234	105.615	30.4271	52.9907	42.0134					AncM6	0.915004	118.795	41.8104		0.392182	20.6028	11.2831
M6_M_alt	1.72638	0.99329	1.75906	8.40235	10.2718	12.9141	17.1676	15.2718	12.4119					M6_M_alt	1.49291	10.5294	14.9505		0.432993	2.26687	2.39409
hsMCL-1	0.676868	0.579419	1.41033	44.5282	62.8619	51.4393	11.5259	12.5152	9.95746					hsMCL-1	0.888872	52.9431	11.3329		0.454215	9.25889	1.28975
	No Peptide			BID			NOXA								No Peptide avg	BID avg	NOXA avg		No Peptide Std Dev	BID std dev	NOXA std dev
No Protein	1.4193	0.70343	0.877429	0.691706	4.63283	0.952349	0.750689	0.050245	0.900269					No Protein	1.00005	2.09229	0.567068		0.373358	2.20402	0.453787
hsBCL-2	0.519962	1.11566	0.497035	15.2526	14.2963	19.9791	0.805412	0.995261	0.346575					hsBCL-2	0.710884	16.5093	0.715749		0.35073	3.04267	0.333509
hsMCL-1	0.790965	1.09698	0.774941	35.3372	36.1488	39.2231	8.4709	9.84546	3.54178					hsMCL-1	0.887628	36.903	7.28604		0.18148	2.04981	3.31466
AncMB1_B	0.733628	0.354721	0.399916	31.8697	23.2574	31.4965	14.4726	22.6022	15.134					AncMB1_B	0.496088	28.8745	17.403		0.206953	4.86817	4.51484
MB1_B_alt_0.2	1.52209	0.883029	0.575193	25.0514	26.8811	24.4758	5.32597	3.06429	2.28577					MB1_B_alt_0.2	0.993438	25.4694	3.55868		0.483008	1.25596	1.57925
MB1_B_alt_0.4	0.973513	0.732395	0.412275	29.9227	29.2221	29.7165	10.0271	5.15065	11.4082					MB1_B_alt_0.4	0.706061	29.6204	8.86198		0.281544	0.360055	3.28746
MB1_B_alt_0.35	1.00641	0.317158	0.084872	24.3744	27.4892	21.7209	9.38496	12.8389	10.7253					MB1_B_alt_0.35	0.46948	24.5282	10.9831		0.47928	2.88725	1.74132
MB1_B_alt_0.3	1.10272	0.858982	0.397363	29.2576	29.7027	30.2978	7.9425	5.93642	5.32465					MB1_B_alt_0.3	0.786355	29.7527	6.40119		0.358243	0.521893	1.36942
MB1_B_alt_0.25	0.303253	0.583367	0.238519	22.2364	29.3859	19.2525	5.00556	4.46662	2.88941					MB1_B_alt_0.25	0.375046	23.6249	4.12053		0.183291	5.20746	1.09971

## Sheet: Fig 3 Lux Assays
	No Peptide			BID			NOXA								No Peptide avg	BID avg	NOXA avg		No Peptide Std Dev	BID std dev	NOXA std dev
No Protein	1.38193	0.113335	1.50506	0.916464	0.529804	0.92909	1.20462	0.121092	0.685555					No Protein	1.00011	0.791786	0.670422		0.770432	0.226971	0.541922
hsBCL-2	0.667273	1.48925	1.39015	32.7237	29.4354	23.8398	0.794193	0.061959	0.751756					hsBCL-2	1.18223	28.6663	0.535969		0.448707	4.49157	0.411053
hsMCL-1	2.00256	1.79589	1.76928	68.0733	78.6812	80.8081	16.9797	22.9791	23.7986					hsMCL-1	1.85591	75.8542	21.2525		0.127695	6.82187	3.72294
L1-1	2.01719	1.90299	1.72629	71.7814	71.8618	80.5365	5.66033	6.08661	6.25147					L1-1	1.88216	74.7266	5.99947		0.146563	5.0317	0.305054
L1-2	3.33577	3.11747	2.6799	69.3693	69.7665	88.923	4.83509	4.73563	6.84622					L1-2	3.04438	76.0196	5.47231		0.333989	11.1764	1.19087
L1-4	3.58933	2.75841	1.83247	101.419	87.4048	82.7503	4.7474	4.44233	5.03172					L1-4	2.72674	90.5246	4.74048		0.878856	9.7174	0.294757
L2-1	2.2293	1.27388	1.5642	131.881	104.588	121.326	7.22582	5.59738	6.60245					L2-1	1.68913	119.265	6.47522		0.489805	13.7628	0.821645
L2-2	3.6102	3.44124	3.54561	103.031	89.3258	107.257	4.4422	4.76099	6.66568					L2-2	3.53235	99.8714	5.28962		0.0852559	9.37412	1.20231
L2-3	3.00098	0.800798	1.38466	95.6089	100.357	111.981	10.4983	7.99482	12.5678					L2-3	1.72881	102.649	10.3536		1.13975	8.4231	2.2899
L3-1	1.74847	1.6701	2.69296	28.1822	39.4551	30.0133	1.72505	1.42334	1.13314					L3-1	2.03718	32.5502	1.42718		0.569272	6.04948	0.295976
L3-2	1.50756	1.7525	2.45901	62.6031	52.2124	58.701	51.7356	47.679	35.8811					L3-2	1.90635	57.8389	45.0986		0.494032	5.24877	8.23622
L3-3	1.87704	2.05856	0.241266	72.635	70.3423	74.1858	0.930814	2.6793	1.82163					L3-3	1.39229	72.3877	1.81058		1.00094	1.93366	0.874295
L4-1	2.0464	3.21624	3.15379	91.1415	87.6283	71.5939	58.1357	76.201	53.958					L4-1	2.80548	83.4545	62.7649		0.658122	10.4208	11.822
L4-2	0.587345	1.71975	2.16017	62.6467	64.6098	55.2514	2.72198	4.17046	2.96987					L4-2	1.48909	60.8359	3.28744		0.811388	4.93499	0.774699
L4-3	2.31149	4.51327	1.64412	127.732	138.373	115.627	6.79497	4.6854	4.56851					L4-3	2.82296	127.244	5.34963		1.5014	11.3808	1.25307
	No Peptide			BID			NOXA								No Peptide avg	BID avg	NOXA avg		No Peptide Std Dev	BID std dev	NOXA std dev
No Protein	1.35718	0.718952	0.923628	0.668824	1.43089	0.580154	0.462197	1.98124	0.520512					No Protein	0.999921	0.893291	0.987982		0.325884	0.467684	0.860679
hsBCL-2	1.10986	0.761638	3.32648	19.4033	21.5832	20.1863	2.45377	1.1531	0.574712					hsBCL-2	1.73266	20.3909	1.39386		1.39123	1.10422	0.962385
hsMCL-1	1.34987	0.902902	0.893751	47.7732	40.2935	53.9199	10.2127	9.1739	6.73469					hsMCL-1	1.04884	47.3289	8.70709		0.260741	6.82407	1.78537
AncM6	0.651108	1.66399	0.821885	37.9413	36.286	28.5517	8.27266	3.20272	7.57068					AncM6	1.04566	34.2597	6.34869		0.542255	5.01206	2.747
J1-1	1.70108	1.23886	1.3206	30.8261	29.3527	35.5499	1.76996	1.76996	1.97299					J1-1	1.42018	31.9095	1.83764		0.246679	3.23755	0.117221
J1-2	2.19692	1.22528	0.581365	37.7199	26.4459	35.1558	2.21011	1.3954	1.79102					J1-2	1.33452	33.1072	1.79884		0.813296	5.90962	0.40741
J1-3	2.35496	0.480128	1.16472	33.7025	28.2075	32.0064	2.07441	2.06727	0.644887					J1-3	1.33327	31.3055	1.59552		0.948713	2.81376	0.823284
J2-1	1.18752	1.04565	1.77064	57.4266	48.9382	51.2846	2.39834	1.21604	2.46437					J2-1	1.33461	52.5498	2.02625		0.384224	4.38337	0.702437
J2-2	1.84496	0.969542	0.268797	61.0244	50.565	52.4635	4.87925	3.56545	3.37544					J2-2	1.02777	54.6843	3.94005		0.789694	5.57215	0.8189
J2-3	0.802188	1.13332	0.500253	86.0236	75.0213	109.278	39.9362	3.33163	29.6786					J2-3	0.811922	90.1076	24.3155		0.316648	17.4897	18.8824
J3-1	0.177749	1.11613	0.838777	61.1362	54.2637	68.686	2.19024	4.30118	1.97203					J3-1	0.710885	61.362	2.82115		0.482085	7.2138	1.28638
J3-2	0.426547	0.677827	2.43158	78.94	56.2432	64.2396	0.382344	4.57677	3.24086					J3-2	1.17865	66.4742	2.73333		1.09232	11.5122	2.14278
J3-3	0.980136	0.676455	1.48367	108.577	93.3313	110.445	6.14379	6.96185	3.54421					J3-3	1.04675	104.118	5.54995		0.407712	9.38783	1.78453
J4-1	1.76249	1.15572	0.759968	62.4457	62.6884	64.7126	2.00341	0.801364	1.22947					J4-1	1.22606	63.2822	1.34475		0.50495	1.24465	0.609258
J4-2	2.47822	0.714036	0.94719	31.2083	53.1632	55.1604	1.59723	2.06277	4.25446					J4-2	1.37982	46.5106	2.63815		0.958365	13.2898	1.41899
J4-3	1.33515	1.11837	1.68093	71.6174	56.0564	49.7404	2.89666	4.5302	3.01234					J4-3	1.37815	59.1381	3.47973		0.283734	11.2594	0.911568
	No Peptide			BID			NOXA								No Peptide avg	BID avg	NOXA avg		No Peptide Std Dev	BID std dev	NOXA std dev
No Protein	1.38193	0.113335	1.50506	0.916464	0.529804	0.92909	1.20462	0.121092	0.685555					No Protein	1.00011	0.791786	0.670422		0.770432	0.226971	0.541922
hsBCL-2	0.667273	1.48925	1.39015	32.7237	29.4354	23.8398	0.794193	0.061959	0.751756					hsBCL-2	1.18223	28.6663	0.535969		0.448707	4.49157	0.411053
hsMCL-1	2.00256	1.79589	1.76928	68.0733	78.6812	80.8081	16.9797	22.9791	23.7986					hsMCL-1	1.85591	75.8542	21.2525		0.127695	6.82187	3.72294
AncB1	0.707714	1.30472	1.51954	52.7712	63.4875	62.2175	14.6035	23.8853	23.759					AncB1	1.17733	59.4921	20.7493		0.420642	5.85496	5.32278
M1-1	0.44497	0.537756	1.00218	57.4606	70.1366	100.029	3.50186	8.39432	2.93547					M1-1	0.661636	75.8756	4.94388		0.298549	21.857	3.00155
M1-2	0.908065	0.790101	1.66677	130.099	145.587	101.425	3.9207	6.1269	4.41256					M1-2	1.12164	125.704	4.82005		0.47576	22.4064	1.15817
M1-3	3.33512	3.03306	3.01583	140.675	141.697	145.87	12.1598	6.1925	6.10848					M1-3	3.128	142.747	8.1536		0.179577	2.75216	3.46974
M2-2	0.951608	1.20537	0.747878	105.102	119.558	114.427	3.10343	2.37862	5.00358					M2-2	0.968285	113.029	3.49521		0.229202	7.32876	1.35563
M2-3	0.984963	0.373209	1.47977	1.36283	1.18931	0.699238	1.40502	0.915523	1.59236					M2-3	0.945979	1.08379	1.3043		0.554308	0.344149	0.349478
M2-4	2.6859	0.877677	3.38935	111.615	108.359	87.6578	3.0403	4.02885	6.11208					M2-4	2.31764	102.544	4.39374		1.2957	12.9941	1.56806
M3-1	2.45948	0.566675	0.863651	117.379	109.256	130.489	1.97721	5.03123	5.02227					M3-1	1.2966	119.041	4.01024		1.01797	10.7139	1.76066
M3-2	0.437976	0.878542	0.848503	65.9691	76.272	76.546	1.96414	2.90462	2.21078					M3-2	0.721674	72.929	2.35985		0.246148	6.02906	0.487642
M3-3	1.28416	0.351255	0.652362	1.45074	1.67616	3.36235	0	0.656642	0.235905					M3-3	0.762592	2.16308	0.297516		0.47612	1.04469	0.332628
M4-1	1.28157	1.1024	0.909918	117.841	121.961	105.834	6.38219	3.71448	5.56437					M4-1	1.09796	115.212	5.22035		0.185868	8.37903	1.36672
M4-2	1.56625	2.068	1.73396	100.004	114.438	103.13	0.638219	0.628149	2.01719					M4-2	1.7894	105.858	1.09452		0.255425	7.59371	0.799072
M4-3	0.6937	0.422216	2.08926	1.96923	0.631888	1.39848	1.2502	0.471311	0.927586					M4-3	1.06839	1.3332	0.883031		0.894459	0.671055	0.39135
	No Peptide			BID			NOXA								No Peptide avg	BID avg	NOXA avg		No Peptide Std Dev	BID std dev	NOXA std dev
No Protein	1.17585	0.450693	1.37324	0.329487	0.848405	0.64688	0.169036	2.1499	0.80581					No Protein	0.999928	0.608257	1.04158		0.485784	0.261606	1.01126
hsBCL-2	1.17231	0.987117	1.25313	15.6006	20.3816	25.2855	1.24745	0.53578	0.949283					hsBCL-2	1.13752	20.4226	0.910839		0.136374	4.84261	0.357392
hsMCL-1	1.06528	0.484345	0.749915	52.7889	49.6313	45.3899	8.07786	9.21902	11.2271					hsMCL-1	0.766512	49.27	9.50799		0.290821	3.7127	1.59438
B1-1	2.93591	1.01356	0.758686	96.8974	105.445	96.429	30.5997	37.3698	42.3214					B1-1	1.56938	99.5903	36.7636		1.19029	5.07528	5.88436
B1-2	1.80297	1.8135	3.07465	83.1884	97.7283	89.4893	29.8569	35.159	31.4677					B1-2	2.23038	90.1353	32.1612		0.731185	7.29143	2.71825
B1-3	3.03728	2.88301	2.2941	120.578	99.975	92.7422	36.4638	35.7609	44.7876					B1-3	2.73813	104.432	39.0041		0.392201	14.4429	5.02099
B2-1	0.985332	1.38384	1.32684	71.4555	62.1015	49.5627	9.46603	10.9021	11.9819					B2-1	1.23201	61.0399	10.7834		0.215518	10.985	1.26215
B2-2	1.9569	1.20965	0.710879	117.61	116.332	115.481	57.2683	58.0827	63.6236					B2-2	1.29248	116.474	59.6582		0.627127	1.07152	3.45822
B2-3	2.68683	2.3142	1.99065	129.735	128.935	120.818	37.0792	26.6359	35.6955					B2-3	2.33056	126.496	33.1369		0.348378	4.93334	5.67234
B3-1	1.48269	1.27191	1.88706	89.5055	68.9219	99.2247	47.5962	45.0388	59.1874					B3-1	1.54722	85.884	50.6074		0.312608	15.4726	7.53965
B3-2	0.924142	1.19756	2.9635	67.5104	73.9752	73.0817	41.6285	45.6698	44.5212					B3-2	1.69507	71.5224	43.9398		1.10697	3.50309	2.08246
B3-4	2.30002	2.25051	0.537763	70.8855	65.2837	72.7596	38.8814	49.596	47.4255					B3-4	1.6961	69.6429	45.301		1.00345	3.88974	5.66442
B4-1	2.41038	2.20684	1.39002	96.2466	105.02	124.038	71.7922	59.5739	48.3759					B4-1	2.00241	108.435	59.914		0.540025	14.2068	11.7119
B4-2	1.05763	0.794298	2.11813	116.722	110.175	103.712	56.8208	58.8683	44.8245					B4-2	1.32335	110.203	53.5045		0.700777	6.50499	7.58654
B4-3	1.18257	2.47736	2.55437	140.785	130.619	112.919	35.3168	45.5691	44.2809					B4-3	2.07144	128.108	41.7223		0.770739	14.1016	5.58454
	No Peptide			BID			NOXA								No Peptide avg	BID avg	NOXA avg		No Peptide Std Dev	BID std dev	NOXA std dev
No Protein	0.889839	0.432384	1.67777	0.477607	0.619941	0.474701	1.10074	0.471197	0.458878					No Protein	0.999998	0.524083	0.676939		0.62996	0.0830282	0.367076
hsBCL-2	0.738437	0.700332	1.04315	22.6355	30.6363	31.9475	0.940069	1.0849	1.24664					hsBCL-2	0.827305	28.4064	1.09053		0.187892	5.04062	0.153361
hsMCL-1	1.48833	1.20751	1.10347	62.3474	61.9648	54.8826	14.4144	11.1622	14.585					hsMCL-1	1.26644	59.7316	13.3872		0.199084	4.2037	1.92882
AncB5	3.51041	0.565781	0.999615	25.1974	16.0258	15.3328	0.754928	1.63819	0					AncB5	1.69194	18.852	0.797707		1.58972	5.50621	0.819934
D1-1	1.70645	0.824767	0.344158	38.2954	34.1364	38.7069	3.63146	6.05244	4.03938					D1-1	0.958459	37.0462	4.57443		0.690917	2.52839	1.29614
D1-2	1.99172	0.549361	1.31678	81.9828	61.4759	81.3612	10.23	9.29518	8.38599					D1-2	1.28595	74.94	9.30371		0.721675	11.6643	0.92201
D1-3	1.67163	1.67163	0.890968	51.6957	69.928	53.6551	6.55559	7.48619	5.29874					D1-3	1.41141	58.4263	6.44684		0.450713	10.0089	1.09777
D2-1	1.18891	2.51766	2.23171	72.1173	74.6425	82.8335	25.5814	20.0432	28.9676					D2-1	1.97942	76.5311	24.8641		0.699376	5.60216	4.50521
D2-2	1.17633	0.816375	0.911796	93.9603	81.9097	72.5606	48.9331	38.143	32.3302					D2-2	0.968167	82.8102	39.8021		0.18648	10.7282	8.42483
D2-3	1.63819	1.54547	2.40028	75.1175	58.6269	68.8872	38.713	22.3299	25.158					D2-3	1.86131	67.5439	28.7336		0.469058	8.32694	8.75731
D3-1	4.12124	5.41959	3.71262	100.188	75.819	104.066	46.395	14.9493	8.98914					D3-1	4.41782	93.3575	23.4445		0.891293	15.3121	20.0979
D3-2	4.32883	4.32883	5.18656	135.807	147.445	67.4839	52.7843	58.2326	48.671					D3-2	4.61474	116.912	53.2293		0.495207	43.1998	4.79635
D3-3	6.25888	9.58588	9.11879	120.651	112.466	154.859	41.3591	58.4493	43.4382					D3-3	8.32118	129.325	47.7488		1.80121	22.4884	9.32496
	No Peptide			BID			NOXA								No Peptide avg	BID avg	NOXA avg		No Peptide Std Dev	BID std dev	NOXA std dev
No Protein	0.889839	0.432384	1.67777	0.477607	0.619941	0.474701	1.10074	0.471197	0.458878					No Protein	0.999998	0.524083	0.676939		0.62996	0.0830282	0.367076
hsBCL-2	0.738437	0.700332	1.04315	22.6355	30.6363	31.9475	0.940069	1.0849	1.24664					hsBCL-2	0.827305	28.4064	1.09053		0.187892	5.04062	0.153361
hsMCL-1	1.48833	1.20751	1.10347	62.3474	61.9648	54.8826	14.4144	11.1622	14.585					hsMCL-1	1.26644	59.7316	13.3872		0.199084	4.2037	1.92882
AncB4	1.17293	0.860396	0.834245	33.0263	30.7733	32.3394	2.70865	1.85982	2.27211					AncB4	0.955857	32.0463	2.2802		0.188445	1.15475	0.424473
C2-1	1.62364	1.0754	0.500837	58.2873	44.8502	45.3662	13.2772	11.1064	6.27593					C2-1	1.06662	49.5012	10.2198		0.561451	7.61334	3.58385
C2-2	1.09872	0.350041	0.553614	42.4299	47.6168	37.1092	17.8536	16.3344	14.7711					C2-2	0.667459	42.3853	16.3197		0.387106	5.25393	1.54133
C2-3	1.41321	2.43433	0.610507	51.3087	43.9821	49.7387	12.9031	7.80092	8.0824					C2-3	1.48602	48.3432	9.59549		0.914089	3.85748	2.86797
C3-1	0.853226	1.38001	1.99172	56.5108	62.4724	69.2503	13.5844	13.8731	13.2942					C3-1	1.40832	62.7445	13.5839		0.569777	6.3741	0.289435
C3-2	1.95023	0.758693	2.55613	66.1164	70.9459	66.9225	16.8445	15.7114	18.318					C3-2	1.75502	67.9949	16.958		0.91448	2.58721	1.30702
C3-3	1.37663	0.635631	0.864634	66.0189	63.7265	69.8768	28.1716	17.348	17.6226					C3-3	0.958966	66.5407	21.0474		0.379401	3.10819	6.1713
C4-1	3.01971	1.31538	1.19402	92.5904	88.8241	72.0699	38.6785	40.6024	35.8795					C4-1	1.84304	84.4948	38.3868		1.02084	10.9238	2.3749
C4-2	1.32016	1.38001	1.2939	76.8016	76.6285	80.7876	30.1285	33.4859	35.2047					C4-2	1.33136	78.0726	32.9397		0.0441354	2.35288	2.58182
C4-3	0.379211	0.905913	0.239292	28.1776	17.358	19.4072	9.71918	13.3273	7.08471					C4-3	0.508139	21.6476	10.0437		0.351515	5.74725	3.13393
	No Peptide				BID				NOXA						No Peptide avg	BID avg	NOXA avg		No Peptide Std Dev	BID std dev	NOXA std dev
No Protein	1.07541	1.17724	0.788633	0.95872	1.04534	0.260605	0.363065	0.737957	0.775866	0.437023	0.634602	1.45226		No Protein	1	0.601741	0.824938		0.166813	0.35994	0.4407
hsBCL-2	1.27025	0.544598	1.43867	0.591522	45.1238	47.7885	49.7242	40.8655	0.99524	1.43709	0.086603	1.59794		hsBCL-2	0.96126	45.8755	1.02922		0.459605	3.83565	0.678106
hsMCL-1	2.40374	1.74379	1.51845	2.17839	66.0438	60.6161	72.2001	75.1113	10.6197	14.459	10.0434	20.4283		hsMCL-1	1.96109	68.4928	13.8876		0.402622	6.47013	4.78069
AncB4	1.79329	2.14234	1.8469	1.05487	42.2689	55.1633	46.5987	37.2327	4.31986	7.22625	6.04959	7.14433		AncB4	1.70935	45.3159	6.18501		0.462529	7.5991	1.3542
C1-1	3.05483	1.84851	1.95824	2.31634	125.312	97.1772	90.2153	97.278	4.01759	5.09398	6.54777	6.04371		C1-1	2.29448	102.496	5.42576		0.544844	15.566	1.11562
C1-2	0.817612	1.74892	0.951288	1.3104	45.85	43.6626	46.3028	38.8565	12.6664	9.10901	10.5655	15.1893		C1-2	1.20705	43.6679	11.8826		0.416886	3.40852	2.64425
C1-3	2.04028	1.60824	1.37261	2.29421	45.7748	46.1117	44.4239	61.5828	11.0684	11.7182	9.38335	12.4839		C1-3	1.82884	49.4733	11.1635		0.415564	8.10588	1.32024

## Sheet: SI Fig 4 Lux Assay
	No Peptide				BID				NOXA						No Peptide avg	BID avg	NOXA avg		No Peptide Std Dev	BID std dev	NOXA std dev
No Protein	1.23991	0.974148	0.787573	0.998373	0.725413	0.779479	0.356911	1.01605	0.348038	0.762531	0.454664	0.412405		No Protein	1	0.719462	0.494409		0.185609	0.272668	0.184045
hsBCL-2	0.863868	0.776323	1.47241	1.24501	19.9669	20.9727	25.0492	29.8663	1.59198	2.988	2.63901	1.47149		hsBCL-2	1.0894	23.9638	2.17262		0.326492	4.50702	0.755225
hsMCL-1	1.90231	2.10148	2.15367	2.15912	35.3561	31.8511	32.0983	35.9592	12.0993	8.70978	6.08095	7.00883		hsMCL-1	2.07915	33.8162	8.47473		0.120718	2.14296	2.65029
R165L	0.656197	0.628639	1.0241	0.841695	34.2194	31.2146	33.6883	41.4017	6.40384	9.21095	7.47987	6.84699		R165L	0.787659	35.131	7.48541		0.183844	4.38075	1.23219
S204fs	0.357056	0.604209	0.112955	0.44276	31.0306	31.8512	30.6395	34.0234	2.65067	2.69209	3.68953	2.04545		S204fs	0.379245	31.8862	2.76944		0.204976	1.51165	0.680889
R165L, S204fs	0.653886	1.16298	0.3623	1.21144	49.0945	47.0347	55.2056	65.2365	13.0717	12.4799	10.3682	11.1599		R165L, S204fs	0.847652	54.1428	11.7699		0.410238	8.16927	1.22955

## Sheet: Fig 6 Lux Assays
	No Peptide				BID				NOXA						No Peptide avg	BID avg	NOXA avg		No Peptide Std Dev	BID std dev	NOXA std dev
No Protein	1.96016	0.674755	0.223829	1.14125	1.66862	0.757716	0.835628	0.75683	0.930228	0.951777	1.56368	0		No Protein	0.952916	1.1892	0.840895		0.900969	0.457339	0.0868189
hsBCL-2	1.24249	0.320977	0.821701	0.835314	27.1257	26.1077	23.8453	28.1049	1.14125	1.81926	2.18456	1.1893		hsBCL-2	0.795057	18.0229	17.6971		0.461335	14.8936	14.4951
hsMCL-1	1.29342	0.855939	1.79815	0.925339	65.4656	75.0592	69.7201	97.6525	17.5567	18.7562	18.696	15.8668		hsMCL-1	1.31584	47.1501	61.6431		0.471506	40.3181	40.6542
AncB4	1.16719	0.539241	1.66776	0.749272	54.9746	35.5278	42.028	37.424	3.57261	1.67694	2.18456	3.00622		AncB4	1.12473	30.4172	27.6749		0.565455	27.4715	20.9997
AncB5	1.2252	1.12342	1.11184	0.645798	31.6818	31.8655	28.1013	31.0339	2.5081	0.894594	3.42375	2.39542		AncB5	1.15349	21.3977	20.5478		0.0623755	17.9719	15.6915
hsBCL-2 (165L, 182E, 262fs)	1.10898	1.61791	0.564651	0.366831	94.4742	88.3329	79.4936	108.267	31.3169	22.5022	22.41	17.5926		hsBCL-2 (165L, 182E, 262fs)	1.09718	61.058	73.026		0.526728	52.6497	38.8809
hsBCL-2 (168L, 183H, 266fs)	0.956037	1.15264	1.6255	2.06623	16.1515	14.9523	14.9789	13.6034	0.801846	2.9192	4.17398	3.81408		hsBCL-2 (168L, 183H, 266fs)	1.24472	11.0567	9.79473		0.3441	7.80899	7.81837
hsBCL-2 (172F, 188G, 262fs)	1.11184	0.56912	0.761879	1.03339	69.211	102.132	105.41	93.5341	7.20047	8.57072	5.11857	7.60834		hsBCL-2 (172F, 188G, 262fs)	0.814279	57.4588	68.7148		0.275127	51.5637	53.6028
AncB4 (168L, 183H, 266fs)	1.93111	0.305087	0.336763	1.06561	53.2919	64.7698	69.8574	77.8989	22.3485	20.2344	22.0099	12.0576		AncB4 (168L, 183H, 266fs)	0.857653	39.7091	56.7016		0.929776	33.9548	30.0211
AncB4 (165L, 182E, 262fs)	1.91447	1.07394	0.370136	2.22643	134.68	132.818	114.11	122.666	2.02426	1.35233	3.97597	1.14478		AncB4 (165L, 182E, 262fs)	1.11951	89.9083	79.6004		0.773173	75.9405	67.3189
AncB4 (172F, 188G, 262fs)	1.08265	0.496997	0.505144	2.3222	48.2714	61.5298	55.6309	52.7956	16.6862	13.1924	16.8513	9.87238		AncB4 (172F, 188G, 262fs)	0.694929	37.3745	41.7042		0.335798	31.0716	21.7126
AncB5 (172F, 188G, 262fs)	1.4332	3.08138	1.10898	1.15552	68.938	101.02	96.3848	96.3751	14.2514	15.3094	13.6154	13.6402		AncB5 (172F, 188G, 262fs)	1.87452	57.0379	69.0037		1.05767	50.9848	47.4169
AncB5 (165L, 182E, 262fs)	1.47958	1.50892	1.05416	0.368586	39.8125	42.8504	61.1241	31.8166	2.39542	0.651651	1.16787	1.88489		AncB5 (165L, 182E, 262fs)	1.34755	27.6772	31.7787		0.254512	23.6987	29.3644
AncB5 (168L, 183H, 266fs)	1.45087	0.938125	1.19375	0.8247	61.7022	56.1732	48.6575	53.731	3.12879	3.24356	2.42775	2.45494		AncB5 (168L, 183H, 266fs)	1.19425	39.5667	35.1724		0.256375	33.6652	27.8663
	No Peptide			BID			NOXA								No Peptide avg	BID avg	NOXA avg		No Peptide Std Dev	BID std dev	NOXA std dev
No Protein	1.3513	0.565231	1.08353	0.805149	0.172112	0.259866	0.157213	0.45833	0.44886					No Protein	1.00002	0.412376	0.354801		0.399635	0.34297	0.171182
hsBCL-2	0.65147	0.781067	0.456116	11.2007	12.2453	12.9109	0.716006	0.624995	0.3241					hsBCL-2	0.629551	12.119	0.555034		0.163581	0.862059	0.205106
hsMCL-1	0.866659	0.447407	0.622042	28.2658	35.2549	33.9276	5.91237	6.47042	6.33806					hsMCL-1	0.645369	32.4828	6.24028		0.210597	3.71181	0.29159
AncM6	0.839704	0.778319	0.687265	49.9249	62.7538	65.1398	26.2314	27.2258	28.4981					AncM6	0.768429	59.2729	27.3184		0.0766992	8.18297	1.13616
AncB1	0.526662	0.682205	0.436805	19.6007	23.1655	24.1779	8.72546	6.41339	10.6859					AncB1	0.548557	22.3147	8.60825		0.124157	2.40427	2.13867
hsMCL-1 (189G, 200S, 258V)	0.909293	0.134011	0.6566	39.4997	51.0204	42.0532	1.04066	1.52266	1.57999					hsMCL-1 (189G, 200S, 258V)	0.566635	44.1911	1.3811		0.395393	6.05061	0.296225
AncM6 (189G, 200S, 258V)	0.929404	0.515661	0.996388	0.987492	0.868627	1.0717	0.933798	0.61526	0.311021					AncM6 (189G, 200S, 258V)	0.813818	0.975938	0.620026		0.260374	0.102026	0.311416
AncB1 (189G, 200S, 258V)	0.634083	0.416184	0.580878	2.83641	3.84478	4.14992	0.28983	0.376187	0.654881					AncB1 (189G, 200S, 258V)	0.543715	3.61037	0.440299		0.113604	0.687412	0.190784
hsMCL-1 (168S, 258V)	0.83718	1.10643	0.417986	9.02323	7.63403	6.07687	8.38967	9.87492	6.99473					hsMCL-1 (168S, 258V)	0.7872	7.57805	8.41977		0.346934	1.47398	1.44033
AncM6 (168S, 258V)	1.13979	0.430514	0.56783	35.1807	43.696	38.2688	1.15584	0.322258	1.39537					AncM6 (168S, 258V)	0.712712	39.0485	0.957823		0.37618	4.31088	0.563294
AncB1 (168S, 258V)	0.531216	0.916891	0.220669	36.3561	28.6843	31.5845	6.24567	7.0733	4.71934					AncB1 (168S, 258V)	0.556259	32.2083	6.01277		0.348786	3.87376	1.19414
hsMCL-1 (200Y)	1.28758	0.643194	0.608858	5.71706	7.59013	6.83875	11.9942	9.76486	11.0214					hsMCL-1 (200Y)	0.846544	6.71531	10.9268		0.382335	0.942619	1.11767
AncM6 (200Y)	0.797973	0.827407	0.903973	4.97016	5.13138	4.70505	3.63378	3.46706	2.94636					AncM6 (200Y)	0.843118	4.93553	3.34907		0.0547185	0.215262	0.358577
AncB1 (200Y)	0.440219	0.323106	0.605823	33.0707	23.4429	26.4159	2.08167	0.679564	1.00994					AncB1 (200Y)	0.456383	27.6432	1.25706		0.14205	4.92983	0.732991
	No Peptide			BID			NOXA								No Peptide avg	BID avg	NOXA avg		No Peptide Std Dev	BID std dev	NOXA std dev
No Protein	0.739492	1.10563	1.15491	0.111872	0.443394	0.398448	0.415524	0.353484	0.254254					No Protein	1.00001	0.317905	0.341087		0.226959	0.179839	0.0813466
hsBCL-2	0.763207	0.375797	0.202553	15.6772	12.0976	15.8738	0.274403	0.522515	1.13509					hsBCL-2	0.447186	14.5495	0.644003		0.287064	2.12571	0.443018
hsMCL-1	1.42006	0.221697	0.217065	27.4548	31.4948	27.5558	10.7956	7.65172	5.77749					hsMCL-1	0.619606	28.8351	8.07495		0.693214	2.30392	2.5357
L1-1	0.93669	1.17566	0.929287	49.7934	39.0349	41.9379	3.94587	4.01196	2.49314					L1-1	1.01388	43.5887	3.48366		0.140155	5.56598	0.858445
V189G, N200S, F258V	0.730487	1.34434	0.77417	46.8322	37.6579	33.0576	1.30341	1.63349	3.64925					V189G, N200S, F258V	0.949666	39.1825	2.19538		0.342496	7.01276	1.26986
V189G	0.195213	1.01981		34.471	40.9291	31.559	26.4154	19.2659	22.6657					V189G	0.60751	35.6531	22.7823		0.583076	4.79556	3.5762
N200S	0.896774	0.813861	0.740119	25.6574	23.9823	25.8027	10.8849	11.3029	13.2282					N200S	0.816918	25.1475	11.8054		0.0783722	1.01167	1.24986
F258V	0.913926	1.0577	0.678187	28.1171	27.5579	38.9949	9.97638	15.3796	15.4057					F258V	0.88327	31.5566	13.5872		0.191603	6.44778	3.12712
V189G, N200S	0.848008	0.834454	0.948479	33.1241	32.296	40.7809	11.8991	14.0152	13.6239					V189G, N200S	0.87698	35.4003	13.1794		0.0622894	4.67807	1.12592
V189G, F258V	0.678406	0.731014	0.727167	28.029	28.4043	37.3443	18.1792	21.2907	16.4713					V189G, F258V	0.712196	31.2592	18.6471		0.0293259	5.27322	2.44355
N200S, F258V	0.5228	0.657079	0.396637	24.7589	35.2947	36.4867	22.017	22.0408	24.7006					N200S, F258V	0.525505	32.1801	22.9195		0.130242	6.45452	1.54254
	No Peptide			BID			NOXA								No Peptide avg	BID avg	NOXA avg		No Peptide Std Dev	BID std dev	NOXA std dev
No Protein	0.748726	1.00684	1.2443	1.44066	0.524186	0.177935	1.42586	0.361676	0.299998					No Protein	0.999955	0.71426	0.695843		0.24786	0.652468	0.632961
hsBCL-2		0.4449	0.661659	19.2363	18.2238	12.8044	1.77872	0.794747	1.56537					hsBCL-2	0.55328	16.7548	1.37961		0.153272	3.45845	0.517619
hsMCL-1	0.9127	0.317299	0.625183	42.0663	39.9534	43.7884	7.77898	5.09553	10.2193					hsMCL-1	0.618394	41.9361	7.69794		0.297759	1.92081	2.56285
L3-1	0.870283	0.935356	0.574663	18.8138	23.4805	20.3043	2.14308	0.889528	1.0963					L3-1	0.793434	20.8662	1.3763		0.192235	2.38356	0.672049
V189G, G202N, D263A	0.845883	0.447789	1.45217	19.9594	17.9838	19.971	0.553152	0.529102	0.383109					V189G, G202N, D263A	0.915281	19.3047	0.488454		0.505775	1.14401	0.0920208
V189G	0.870283	0.266596	0.499439	47.3977	50.8965	45.4664	28.4603	24.386	36.3931					V189G	0.545439	47.9202	29.7465		0.304461	2.75252	6.10605
G202N	1.63135	1.40238	2.32822	17.0207	14.2675	14.1235	9.91884	7.27714	6.21143					G202N	1.78731	15.1372	7.80247		0.482223	1.63276	1.90872
D263A	0.249251	0.719867	0.375558	69.0697	51.652	46.0183	12.3301	10.0122	12.0203					D263A	0.448225	55.58	11.4542		0.243578	12.0172	1.25834
V189G, G200N	1.14264	0.543274	1.45689	29.4716	19.4629	17.8727	1.02618	1.60024	1.57092					V189G, G200N	1.0476	22.2691	1.39912		0.464165	6.288	0.323301
V189G, D263A	0.843911	1.1361	0.645255	113.175	35.4979	53.5528	31.521	33.7964	32.415					V189G, D263A	0.875089	67.4085	32.5775		0.246904	40.6499	1.14632
G200N, D263A	0.953358	0.886325	0.453681	14.3139	13.2813	15.1069	5.34294	7.35034	7.56098					G200N, D263A	0.764455	14.234	6.75142		0.271217	0.915425	1.22432
	No Peptide			BID			NOXA								No Peptide avg	BID avg	NOXA avg		No Peptide Std Dev	BID std dev	NOXA std dev
No Protein	0.748726	1.00684	1.2443	1.44066	0.524186	0.177935	1.42586	0.361676	0.299998					No Protein	0.999955	0.71426	0.695843		0.24786	0.652468	0.632961
hsBCL-2		0.4449	0.661659	19.2363	18.2238	12.8044	1.77872	0.794747	1.56537					hsBCL-2	0.55328	16.7548	1.37961		0.153272	3.45845	0.517619
hsMCL-1	0.9127	0.317299	0.625183	42.0663	39.9534	43.7884	7.77898	5.09553	10.2193					hsMCL-1	0.618394	41.9361	7.69794		0.297759	1.92081	2.56285
L3-3	2.20464	0.221973	1.16749	36.7521	30.6439	28.157	1.59254	0.829727	1.50507					L3-3	1.19803	31.851	1.30911		0.991687	4.42285	0.417457
A167T, V189G, G202S	1.32453	1.14424	0.622447	29.1658	36.9715	32.7299	1.39584	0.925928	0.911934					A167T, V189G, G202S	1.03041	32.9557	1.0779		0.364621	3.90775	0.275435
V189G	0.870283	0.266596	0.499439	47.3977	50.8965	45.4664	28.4603	24.386	36.3931					V189G	0.545439	47.9202	29.7465		0.304461	2.75252	6.10605
A167T	0.992224	0.32734	0.742115	59.933	36.2578	55.3648	16.5628	15.6236	11.9553					A167T	0.687226	50.5185	14.7139		0.335823	12.5596	2.43474
G202S	1.75747	1.4607	0.277466	30.7926	28.3413	28.1259	31.7437	30.538	34.6134					G202S	1.16521	29.0866	32.2984		0.782998	1.48137	2.09357
A167T, 189G	2.16593	1.32467	0.879586	25.9346	28.5677	32.5333	23.6559	27.2539	26.6136					A167T, 189G	1.45673	29.0119	25.8411		0.653259	3.32173	1.91937
A167T, G202S	1.58607	0.899994	1.72399	25.2093	23.0891	19.6012	8.61995	7.05268	10.3308					A167T, G202S	1.40335	22.6332	8.6678		0.441341	2.8317	1.63957
V189G, G202S	1.41421	1.07749	0.82599	23.9728	25.5036	23.6635	3.05616	1.36104	2.08547					V189G, G202S	1.1059	24.38	2.16756		0.295137	0.985329	0.850536
	No Peptide			BID			NOXA								No Peptide avg	BID avg	NOXA avg		No Peptide Std Dev	BID std dev	NOXA std dev
No Protein	0.748726	1.00684	1.2443	1.44066	0.524186	0.177935	1.42586	0.361676	0.299998					No Protein	0.999955	0.71426	0.695843		0.24786	0.652468	0.632961
hsBCL-2		0.4449	0.661659	19.2363	18.2238	12.8044	1.77872	0.794747	1.56537					hsBCL-2	0.55328	16.7548	1.37961		0.153272	3.45845	0.517619
hsMCL-1	0.9127	0.317299	0.625183	42.0663	39.9534	43.7884	7.77898	5.09553	10.2193					hsMCL-1	0.618394	41.9361	7.69794		0.297759	1.92081	2.56285
L4-3	5.54139	0.107525	1.15399	61.9484	56.1917	51.2671	3.60513	2.9287	1.96484					L4-3	2.26764	56.4691	2.83289		2.88303	5.34601	0.824329
A167T, V189G, V256fs	0.830069	1.53117	0.668789	51.049	54.1985	46.3805	1.02493	1.33643	1.10735					A167T, V189G, V256fs	1.01001	50.5426	1.15624		0.458489	3.93352	0.161398
V189G	0.870283	0.266596	0.499439	47.3977	50.8965	45.4664	28.4603	24.386	36.3931					V189G	0.545439	47.9202	29.7465		0.304461	2.75252	6.10605
A167T	0.992224	0.32734	0.742115	59.933	36.2578	55.3648	16.5628	15.6236	11.9553					A167T	0.687226	50.5185	14.7139		0.335823	12.5596	2.43474
V256fs	0	0.445859	0.809608	41.5408	40.9238	44.3226	31.1709	38.6015	32.5954					V256fs	0.418489	42.2624	34.1226		0.405497	1.81063	3.94366
A167T, V189G	2.16593	1.32467	0.879586	25.9346	28.5677	32.5333	23.6559	27.2539	26.6136					A167T, V189G	1.45673	29.0119	25.8411		0.653259	3.32173	1.91937
A167T, V256fs	1.58607	2.58598	1.01911	48.2056	43.71	49.7546	29.6909	22.187	21.9327					A167T, V256fs	1.73039	47.2234	24.6035		0.793345	3.13975	4.40764
V189G, B256fs	1.2896	1.28337	0.636942	51.8854	52.8062	52.1448	3.327	8.95445	5.74663					V189G, B256fs	1.06997	52.2788	6.00936		0.375025	0.4748	2.82291

## Sheet: SI Fig 6 Lux Assays
	No Peptide			BID			NOXA								No Peptide avg	BID avg	NOXA avg		No Peptide Std Dev	BID std dev	NOXA std dev
No Protein	0.846154	0.637341	1.5165	0.401315	0.42528	0.470919	0.310699	0.280985	1.19387					No Protein	1	0.432505	0.595183		0.45933	0.0353599	0.518687
hsBCL-2	0.164321	0.038693	0.746913	16.9927	25.7291	27.7863	1.36234	1.66523	0.925711					hsBCL-2	0.316642	23.5027	1.31776		0.377883	5.73087	0.371771
hsMCL-1	0.915263	1.31729	1.67723	44.0611	31.8194	41.8745	17.1777	19.0503	10.5911					hsMCL-1	1.30326	39.2517	15.6063		0.381179	6.52872	4.4431
B1-3	1.03898	0.516751	1.15345	104.225	52.7495	65.4833	11.1019	10.0589	6.62137					B1-3	0.903059	74.1526	9.26073		0.339413	26.8104	2.34449
B1-3 revert r165L			0.54329	17.3769	18.1421	64.6583	1.22127	1.03434	1.54076					B1-3 revert r165L	0.54329	33.3925	1.26546		#DIV/0!	27.0797	0.256087
B2-1	0.907627	0.694067	0.536325	67.7417	31.1384	80.4841	10.5929	8.74311	6.77823					B2-1	0.712673	59.7881	8.70476		0.186349	25.6163	1.90764
B2-1 revert r165L	0.619753	0.342487	0.716661	31.4864	36.7104	53.4758	0.596586	1.35054	0.854768					B2-1 revert r165L	0.559634	40.5575	0.933964		0.194197	11.4884	0.383164
B3-1	0.7151	0.590192	0.082336	26.6237	32.6415	34.8228	14.3611	22.838	13.0041					B3-1	0.462543	31.3627	16.7344		0.335139	4.2465	5.32922
B3-1 revert d159G	0.618553		0.703697	40.2244	36.8114	40.9472	1.66535	2.24849	2.3955					B3-1 revert d159G	0.661125	39.3277	2.10311		0.0602059	2.20893	0.386171
	No Peptide			BID			NOXA								No Peptide avg	BID avg	NOXA avg		No Peptide Std Dev	BID std dev	NOXA std dev
No Protein	1.64572	0.371973	0.982067	0.071799	2.24653	1.02425	1.07387	0.504061	0.949961					No Protein	0.99992	1.11419	0.84263		0.637062	1.09015	0.299683
hsBCL-2	1.6108	0.762314	2.00397	33.9839	31.2947	29.9489	1.90411	2.96491	1.92572					hsBCL-2	1.45903	31.7425	2.26491		0.634591	2.05439	0.60631
hsMCL-1	1.84423	0.981157	1.35922	71.1373	58.9156	83.6253	18.6742	16.8158	17.6332					hsMCL-1	1.39487	71.2261	17.7077		0.432638	12.3551	0.931444
AncB4	1.16118	1.00812	0.73949	43.238	51.5953	48.1185	7.19068	2.84886	4.41053					AncB4	0.969597	47.6506	4.81669		0.213468	4.19823	2.19922
C2-1	1.08329	0.778329	1.27577	70.3404	63.6273	54.3293	15.0411	16.2158	11.653					C2-1	1.0458	62.7657	14.3033		0.250833	8.04026	2.36918
C2-1 revert y183C	0.194174	1.9453	2.01068	58.5809	63.9776	110.936	2.53851	4.00599	4.5922					C2-1 revert y183C	1.38338	77.8315	3.71223		1.03041	28.7961	1.05789
C4-2	1.46069	1.73937	0.8912	98.5235	98.4842	106.72	42.1744	26.1703	29.0652					C4-2	1.36375	101.243	32.47		0.432312	4.74386	8.52801
C4-2 revert y183H	2.02328	2.44814	1.66689	32.5292	28.2296	16.9546	6.00557	5.27112	4.47555					C4-2 revert y183H	2.0461	25.9045	5.25075		0.391123	8.04339	0.765214
C4-3	2.49417	1.3019	0.972912	45.59	59.7991	54.9471	38.5142	26.5895	22.9985					C4-3	1.58966	53.4454	29.3674		0.80041	7.22263	8.1223
C4-3 revert y183H	0.602414	1.1768	2.20036	44.8698	45.0756	30.7975	3.83789	6.22324	9.70772					C4-3 revert y183H	1.32652	40.2477	6.58962		0.809424	8.18472	2.95201
	No Peptide			BID			NOXA								No Peptide avg	BID avg	NOXA avg		No Peptide Std Dev	BID std dev	NOXA std dev
No Protein	1.36056	0.669089	0.970546	1.3722	0.749884	0.307275	1.37113	1.49378	1.65356					No Protein	1.00006	0.809786	1.50616		0.346679	0.534983	0.141622
hsBCL-2	0.931081	1.3133	0.816264	25.2531	22.5129	24.8455	0.845403	1.33506	0.607704					hsBCL-2	1.02022	24.2038	0.929391		0.260233	1.47852	0.370883
hsMCL-1	2.755	1.87741	1.87394	29.9589	34.5119	37.6393	5.7195	6.4007	6.23783					hsMCL-1	2.16878	34.0367	6.11934		0.507682	3.8622	0.355721
L1-1	0.869289	2.42086	1.77315	38.8257	38.7653	43.4908	0.957684	1.77825	2.70366					L1-1	1.68777	40.3606	1.8132		0.779302	2.71097	0.873515
L1-1 revert v189G	1.81537	1.28123	1.14701	36.3024	33.2275	33.5736	23.3607	18.9908	14.72					L1-1 revert v189G	1.41454	34.3678	19.0238		0.353557	1.68429	4.32045
L3-3	1.8653	0.905622	1.79818	38.0612	33.4556	32.7841	0.472017	1.26027	0.839729					L3-3	1.52303	34.767	0.857339		0.535745	2.87256	0.394421
L3-3 revert v189G	2.54768	0.867581	2.28977	31.5308	23.1218	26.9965	3.36645	4.2834	3.10499					L3-3 revert v189G	1.90168	27.2164	3.58495		0.904792	4.20881	0.618847
L4-3	0.304851	1.61976	1.36401	41.9823	35.1452	42.1677	0.872927	0.761377	1.35579					L4-3	1.09621	39.7651	0.996696		0.697164	4.002	0.315942
L4-3 revert v189G	1.18757	0.747065	1.7972	58.811	56.5507	33.7718	23.2263	14.49	15.1655					L4-3 revert v189G	1.24395	49.7112	17.6273		0.527335	13.8501	4.86065
	No Peptide			BID			NOXA								No Peptide avg	BID avg	NOXA avg		No Peptide Std Dev	BID std dev	NOXA std dev
No Protein	1.22331	1.24156	0.535171	0.918272	1.19411	1.25153	0.503987	0.654016	0.532747					No Protein	1.00001	1.1213	0.563583		0.402668	0.17816	0.0796262
hsBCL-2	0.913281	1.0772	1.2677	28.5049	20.864	16.6743	1.36526	1.3189	1.34282					hsBCL-2	1.08606	22.0144	1.34232		0.177374	5.99861	0.0231814
hsMCL-1	0.549797	0.84563	1.48571	39.0356	32.8188	33.9248	7.98097	6.01809	7.42734					hsMCL-1	0.96038	35.2598	7.14214		0.478394	3.31645	1.01204
AncM6	1.81778	0.877258	0.957514	70.9572	52.8453	54.0442	24.8997	26.7307	28.0073					AncM6	1.21752	59.2822	26.5459		0.521389	10.1286	1.562
J1-1	0.933576	1.58838	0.952002	38.2739	27.064	30.9653	2.31639	0.400104	2.01136					J1-1	1.15798	32.1011	1.57595		0.372844	5.69058	1.02967
J1-1 revert g202C	1.36797	1.40355	1.85666	63.1331	63.849	56.9457	43.2453	37.5517	33.9174					J1-1 revert g202C	1.54273	61.3093	38.2381		0.272458	3.7959	4.70167
J1-2	1.13543	0.863661	0.939638	31.5801	36.7005	27.4094	1.24132	0.738978	1.64749					J1-2	0.979576	31.8967	1.20926		0.140217	4.65367	0.455102
J3-1	1.25406	1.1114	0.189238	63.9225	55.0451	50.5079	1.71901	1.50577	2.18187					J3-1	0.851565	56.4918	1.80222		0.57801	6.82331	0.345646
J3-1 revert f168S	0.698519	1.08917	0.563706	73.4191	63.2799	74.0033	38.7888	32.4774	32.6522					J3-1 revert f168S	0.783799	70.2341	34.6395		0.272916	6.02959	3.59452
J3-1 revert f258S	0.927182	1.50039	0.931573	67.0338	73.3561	77.9023	22.7664	19.4431	21.3819					J3-1 revert f258S	1.11972	72.7641	21.1971		0.329682	5.45837	1.66935
J3-2	1.4795	1.32736	0.991125	98.9159	60.8158	47.1798	1.05449	1.18935	0.49202					J3-2	1.26599	68.9705	0.911954		0.249903	26.8147	0.369872
J3-2 revert v189G	1.11766	1.01428	0.756954	68.5934	72.8584	55.0549	11.4151	17.1022	16.1463					J3-2 revert v189G	0.962966	65.5022	14.8878		0.185748	9.29555	3.04523
J4-1	0.931188	1.00957	0.54105	63.9582	57.8377	60.4115	2.84664	1.81179	1.34704					J4-1	0.827268	60.7358	2.00183		0.25095	3.07306	0.767648
J4-1 revert f168S	1.39019	1.12157	1.20121	102.073	91.1935	87.5421	48.2438	48.8401	51.1171					J4-1 revert f168S	1.23766	93.6028	49.4003		0.137968	7.55902	1.51639
J4-1 revert f258V	1.04945	1.28474	1.02779	96.2975	105.295	94.0679	41.0802	35.688	27.5181					J4-1 revert f258V	1.12066	98.5535	34.7621		0.142508	5.94385	6.82829
	No Peptide			BID			NOXA								No Peptide avg	BID avg	NOXA avg		No Peptide Std Dev	BID std dev	NOXA std dev
No Protein	1.22331	1.24156	0.535171	0.918272	1.19411	1.25153	0.503987	0.654016	0.532747					No Protein	1.00001	1.1213	0.563583		0.402668	0.17816	0.0796262
hsBCL-2	0.913281	1.0772	1.2677	28.5049	20.864	16.6743	1.36526	1.3189	1.34282					hsBCL-2	1.08606	22.0144	1.34232		0.177374	5.99861	0.0231814
hsMCL-1	0.549797	0.84563	1.48571	39.0356	32.8188	33.9248	7.98097	6.01809	7.42734					hsMCL-1	0.96038	35.2598	7.14214		0.478394	3.31645	1.01204
AncB1	0.900234	0.816356	0.838355	28.7957	28.3013	28.6792	18.0379	17.2712	18.6455					AncB1	0.851648	28.5921	17.9849		0.0434904	0.258441	0.688715
M1-2	1.09706	0.901384	0.676647	80.2902	84.4712	62.4108	3.8004	4.11872	2.54958					M1-2	0.891697	75.7241	3.48956		0.210373	11.7176	0.829467
M2-4	0.481777	0.672664	0.510862	41.6908	35.1239	36.4719	1.92448	2.45543	2.61606					M2-4	0.555101	37.7622	2.33199		0.102846	3.46842	0.361942
M2-4 revert n200S	0.252318	0.387335	0.298585	22.8059	27.4017	23.9901	15.9426	20.4478	15.324					M2-4 revert n200S	0.312746	24.7326	17.2381		0.0686134	2.38616	2.79681
M4-1	0.613063	0.495962	0.535171	37.1137	37.2182	33.8045	2.31128	2.05817	2.34044					M4-1	0.548065	36.0455	2.23663		0.0596059	1.94145	0.155237
M4-2	1.37741	1.20115	0.597716	35.8057	49.0679	37.7077	0.634606	1.18054	0.494694					M4-2	1.05876	40.8604	0.769946		0.408884	7.17119	0.3624
M4-2 revert n200Y	0.516263	0.303767	0.58581	41.1062	27.1712	38.2477	6.89794	9.25597	8.3564					M4-2 revert n200Y	0.468613	35.5084	8.1701		0.146935	7.36027	1.19

## Sheet: Fig 7 Lux Assays
	No Peptide			BID			NOXA								No Peptide avg	BID avg	NOXA avg		No Peptide Std Dev	BID std dev	NOXA std dev
No Protein	1.84986	0.761499	0.388749	1.43172	0.295904	1.05224	1.35659	2.43578	0.192635					No Protein	1.00004	0.926621	1.32833		0.7592	0.578235	1.12184
hsBCL-2	0.357294	0.793903	0.390892	7.17566	19.8801	12.8598	1.16455	1.42799	0.727486					hsBCL-2	0.51403	13.3052	1.10667		0.242959	6.36392	0.353821
hsMCL-1	0	1.08852	1.20853	45.8947	48.3259	56.5252	10.6277	14.082	10.9989					hsMCL-1	0.765685	50.2486	11.9029		0.665812	5.56999	1.89627
P1-1	0.712088	1.00618	0.813874	69.0883	37.6124	66.3541	21.107	16.5739	15.6666					P1-1	0.844048	57.6849	17.7825		0.14935	17.437	2.91464
P1-2	0	1.28225	0.763368	82.9433	65.6836	76.498	28.3535	24.5576	30.4711					P1-2	0.681872	75.0416	27.794		0.644998	8.72152	2.99617
P1-3	0.424775	1.05243	1.24378	49.8116	58.9418	56.002	16.2415	19.3416	23.2724					P1-3	0.906995	54.9185	19.6185		0.428435	4.66055	3.52363
P2-1	1.39569	0.608537	0.603208	66.5099	54.9504	59.0241	15.7164	18.3555	16.5352					P2-1	0.869145	60.1615	16.869		0.456009	5.86305	1.35088
P2-2	0.931904	0.465448	0.835522	106.969	105.646	88.096	19.8615	30.3537	36.4081					P2-2	0.744291	100.237	28.8744		0.246247	10.535	8.37188
P2-3	0.234307	0.050533	1.07635	45.9242	46.4101	36.5365	32.4369	28.5038	31.2012					P2-3	0.45373	42.9569	30.714		0.546977	5.56558	2.01132
P3-1	0.877599	0.848877	0.690442	58.1068	64.0114	61.6263	26.3585	17.5874	25.4493					P3-1	0.805639	61.2482	23.1317		0.100792	2.97044	4.82301
P3-2	0.277053	1.14811	0.671105	68.6471	53.8953	65.2856	31.5922	33.5977	21.9733					P3-2	0.698755	62.6093	29.0544		0.436184	7.73149	6.21383
P3-3	0.410038	1.08215	0.771576	67.6938	54.564	63.9626	27.4812	20.5977	20.529					P3-3	0.754587	62.0735	22.8693		0.336376	6.76568	3.9942
P4-1	1.29397	0.842426	0.448479	70.4393	68.0809	60.4076	8.66137	9.3057	7.60928					P4-1	0.861626	66.3093	8.52545		0.423073	5.24524	0.856339
P4-2	0.559506	0.578682	0.307309	64.7262	58.1531	57.9692	6.48488	6.99167	5.81963					P4-2	0.481832	60.2828	6.43206		0.151445	3.84919	0.587802
P4-3	0.376958	0.943003	0.880449	56.1777	64.5667	60.529	11.3202	7.98311	7.49833					P4-3	0.73347	60.4245	8.93389		0.310329	4.19551	2.08079
	No Peptide			BID			NOXA								No Peptide avg	BID avg	NOXA avg		No Peptide Std Dev	BID std dev	NOXA std dev
No Protein	0.889839	0.432384	1.67777	0.477607	0.619941	0.474701	1.10074	0.471197	0.458878					No Protein	0.999998	0.524083	0.676939		0.62996	0.0830282	0.367076
hsBCL-2	0.738437	0.700332	1.04315	22.6355	30.6363	31.9475	0.940069	1.0849	1.24664					hsBCL-2	0.827305	28.4064	1.09053		0.187892	5.04062	0.153361
hsMCL-1	1.48833	1.20751	1.10347	62.3474	61.9648	54.8826	14.4144	11.1622	14.585					hsMCL-1	1.26644	59.7316	13.3872		0.199084	4.2037	1.92882
W1-1	2.74592	0.784113	2.09293	2.00816	2.47067	2.26049	90.604	70.4326	77.1987					W1-1	1.87432	2.24644	79.4118		0.999008	0.231577	10.2662
W1-2	3.17655	1.28587	2.79741	19.5158	11.8984	25.8108	55.6094	37.4292	36.0101					W1-2	2.41994	19.075	43.0162		1.00027	6.96666	10.9291
W1-3	1.81053	2.85731	3.50341	1.96332	1.48589	5.14426	90.9587	91.123	79.002					W1-3	2.72375	2.86449	87.0279		0.854306	1.98872	6.95111
W2-1	1.22414	2.39667	2.99248	2.53459	4.82531	4.12383	87.9093	80.0198	94.3019					W2-1	2.20443	3.82791	87.4103		0.899707	1.17368	7.15414
W2-2	2.39502	0.542673	0.806992	1.27984	7.91079	3.60793	70.9202	85.8101	68.9689					W2-2	1.24823	4.26619	75.2331		1.0019	3.36413	9.21182
W2-4	1.90488	2.55428	1.56493	6.21965	3.03825	3.74777	80.977	85.838	97.6707					W2-4	2.00803	4.33523	88.1619		0.50268	1.67008	8.58608

## Sheet: SI Fig 7 Lux Assays
	No Peptide			BID			NOXA								No Peptide avg	BID avg	NOXA avg		No Peptide Std Dev	BID std dev	NOXA std dev
No Protein	1.15625	0.953782	0.890163	0.993077	0.702679	0.463349	1.07358	0.385956	0.76193					No Protein	1.00007	0.719702	0.740489		0.138951	0.265274	0.344314
hsBCL-2	1.48254	0.453638	0.853465	25.9758	9.91072	20.2116	1.43984	0.945579	1.75289					hsBCL-2	0.92988	18.6994	1.37943		0.518688	8.13858	0.407029
hsMCL-1	0.841751	0.588408	0.86551	25.9	18.8734	42.0237	8.80012	7.52422	10.4679					hsMCL-1	0.765223	28.9324	8.93076		0.153586	11.8693	1.4762
P1-5	1.16694	0.836828	1.16326	31.594	24.4965	46.7145	1.14044	1.16713	2.32518					P1-5	1.05568	34.2683	1.54425		0.189537	11.3479	0.676436
P1-6	1.1593	0.535217	0.541477	28.4985	34.49	35.6506	1.38446	2.23474	0.729517					P1-6	0.745331	32.8797	1.44957		0.35852	3.83837	0.754719
P1-7	0.893017	0.36075	0.289151	22.7326	27.0088	31.309	0.547777	0.952925	1.55483					P1-7	0.514306	27.0168	1.01851		0.329921	4.28821	0.506718
P2-5	0.72309	0.686476	0.149129	2.00682	2.958	3.83925	0.672585	0.611845	0					P2-5	0.519565	2.93469	0.428143		0.321329	0.916435	0.372025
P2-6	0.501706	1.09116	1.2025	18.0047	14.7682	18.0375	0.951728	0.926132	0.893368					P2-6	0.931788	16.9368	0.923743		0.3766	1.87811	0.0292533
P2-7	0.478469	0.907596	0.785867	11.999	21.072	14.6975	1.29935	0.962001	0.645995					P2-7	0.723977	15.9229	0.969114		0.221157	4.65895	0.326734
P4-6	1.69077	1.02085	0.850085	0.543715	0.178253	0.160164	1.06326	0.568182	0.887091					P4-6	1.18724	0.294044	0.839512		0.444357	0.216411	0.250947
P4-7	1.54046	0.85966	1.01786	28.2874	29.4516	35.122	0.623519	1.87056	0.910548					P4-7	1.13933	30.9536	1.13487		0.356283	3.6565	0.653083
P4-8	2.74601	1.06326	0.20002	38.1929	41.5226	42.1097	1.1655	2.58838	1.95219					P4-8	1.33643	40.6084	1.90203		1.29479	2.11242	0.712767
	No Peptide			BID			NOXA								No Peptide avg	BID avg	NOXA avg		No Peptide Std Dev	BID std dev	NOXA std dev
No Protein	1.15625	0.953782	0.890163	0.993077	0.702679	0.463349	1.07358	0.385956	0.76193					No Protein	1.00007	0.719702	0.740489		0.138951	0.265274	0.344314
hsBCL-2	1.48254	0.453638	0.853465	25.9758	9.91072	20.2116	1.43984	0.945579	1.75289					hsBCL-2	0.92988	18.6994	1.37943		0.518688	8.13858	0.407029
hsMCL-1	0.841751	0.588408	0.86551	25.9	18.8734	42.0237	8.80012	7.52422	10.4679					hsMCL-1	0.765223	28.9324	8.93076		0.153586	11.8693	1.4762
X1-1	0.954927	0.051641	0.099812	23.5375	29.6319	23.547	2.23527	3.96825	2.28503					X1-1	0.368793	25.5721	2.82952		0.508178	3.51586	0.986488
X1-2	0.682501	0.582343	0.450938	36.1088	35.6506	36.4015	0.572475	0.485625	0.059001					X1-2	0.571927	36.0536	0.372367		0.116132	0.378482	0.274835
X1-3	0.619694	0.639928	0.76234	38.251	42.7221	40.0758	2.34048	1.68738	1.35888					X1-3	0.673987	40.3496	1.79558		0.0771816	2.24811	0.499664
X2-1	1.16863	0.919153	0.859254	39.4323	34.8777	49.3719	0.93776	0	0.760291					X2-1	0.982345	41.2273	0.566017		0.164082	7.41196	0.498152
X2-2	0.694044	0.327348	0.321981	21.7161	32.6052	28.919	0.364219	0.250645	0.355669					X2-2	0.447791	27.7468	0.323511		0.213278	5.53839	0.0632484
X2-3	1.41501	1.2164	0.596878	3.34743	4.0764	5.07059	0.579777	1.79932	0.531011					X2-3	1.0761	4.16481	0.970036		0.426732	0.864974	0.718595
X3-1	0.68535	1.19069	0.464201	20.5825	27.0977	24.2644	0.763301	0.81866	0.7373					X3-1	0.78008	23.9815	0.773087		0.372393	3.26678	0.0415534
X3-2	0.31176	1.22436	0.776298	29.274	12.8249	28.3527	0.791043	1.2271	0.547645					X3-2	0.770808	23.4839	0.855264		0.456327	9.24244	0.344252
X3-3	0.508099	1.10448	0.315657	22.898	19.7536	30.1401	0.923873	1.54355	0.652061					X3-3	0.642747	24.2639	1.03983		0.41129	5.32629	0.456918
X4-1	1.2075	0.384069	1.00208	24.7215	20.202	26.5986	0.318042	0.822764	1.46392					X4-1	0.864551	23.8407	0.86824		0.428598	3.288	0.574289
X4-2	0	0.192034	0.374111	63.6293	69.2166	71.1895	2.02497	0.820268	1.15787					X4-2	0.188715	68.0118	1.33437		0.187078	3.92145	0.621441
X4-3	0.756064	0.917396	0.741359	33.9213	36.3887	37.7117	0.656685	0.653595	0.678188					X4-3	0.80494	36.0072	0.662823		0.0976672	1.92379	0.0133962
	No Peptide			BID			NOXA								No Peptide avg	BID avg	NOXA avg		No Peptide Std Dev	BID std dev	NOXA std dev
No Protein	1.35737	0.71899	0.923619	0.669169	1.43134	0.580285	0.462386	1.98185	0.520617					No Protein	0.999993	0.893597	0.988284		0.325971	0.467812	0.860946
hsBCL-2	1.11002	0.76167	3.32661	19.4127	21.5913	20.1968	2.4547	1.15357	0.574832					hsBCL-2	1.73277	20.4003	1.39437		1.39125	1.10346	0.962792
hsMCL-1	1.35005	0.902937	0.89377	47.7981	40.3085	53.9485	10.2174	9.17648	6.73638					hsMCL-1	1.04892	47.3517	8.7101		0.260825	6.83095	1.78678
AncB4	0.738078	1.39005	0.861303	24.8156	25.6077	23.7907	1.70811	2.21081	1.90999					AncB4	0.996476	24.738	1.94297		0.346366	0.910993	0.252969
AncB5	0.958653	1.21296	0.82481	26.7889	20.6993	19.8884	0.236604	0.431022	1.23919					AncB5	0.998806	22.4589	0.635605		0.197164	3.77179	0.531681
I1-2	1.60789	0.929961	0.383461	48.7086	48.5583	32.8951	7.24994	7.55286	7.5232					I1-2	0.973771	43.3873	7.442		0.613389	9.08686	0.166988
I2-1	1.15152	0.673021	1.60671	37.5122	40.1935	31.0593	7.61996							I2-1	1.14375	36.255	7.61996		0.466893	4.69509	#DIV/0!
I5-1	1.18302	0.925075	0.965664	78.6855	63.9252	61.5757	11.3044	9.6081	7.94313					I5-1	1.02459	68.0621	9.61854		0.1387	9.27481	1.68066
I6-2	0.55501	1.6209	1.01007	26.4828	29.8451	19.192	6.25075	5.23449	3.11995					I6-2	1.06199	25.1733	4.86839		0.53484	5.44597	1.59718
	No Peptide			BID			NOXA								No Peptide avg	BID avg	NOXA avg		No Peptide Std Dev	BID std dev	NOXA std dev
No Protein	1.49223	0.559585	0.948133	0.147774	1.22528	0.133985	1.15527	0.70336	0.87189					No Protein	0.999981	0.502346	0.910174		0.468477	0.626117	0.228375
hsBCL-2	1.10095	1.54739	0.255381	30.2562	26.7694	25.7877	1.47161	1.24652	0.660621					hsBCL-2	0.967909	27.6044	1.12625		0.6562	2.34836	0.41866
hsMCL-1	1.85451	1.57977	1.15103	330.575	67.2831	48.6476	19.6323	14.7143	18.6253					hsMCL-1	1.52844	148.835	17.6573		0.354536	157.667	2.59799
B1-3 (Q1)	1.54169	3.23845	4.43509	171.741	111.995	118.894	77.4928	61.5216	64.3795					B1-3 (Q1)	3.07174	134.21	67.798		1.45388	32.6852	8.51671
B2-1 (Q2)	1.7584	1.19131	3.22584	97.7906	73.8402	79.7651	23.5814	23.908	25.2493					B2-1 (Q2)	2.05852	83.7986	24.2462		1.04994	12.4743	0.883905
B3-1(Q3)	1.42783	1.39896	2.48748	71.1984	81.908	64.3634	66.7043	67.854	100.82					B3-1(Q3)	1.77143	72.4899	78.4593		0.620291	8.84333	19.3732
B4-2 (Q4)	2.38261	2.61005	2.59898	120.343	95.8493	105.106	92.8493	84.195	80.285					B4-2 (Q4)	2.53055	107.099	85.7764		0.128234	12.3677	6.42968
Q1-1	1.72205	0.70841	0.921846	82.1252	59.4297	76.7264	1.75038	0.583616	4.49096					Q1-1	1.11744	72.7604	2.27498		0.534376	11.8561	2.0058
Q1-2	1.75798	0.778837	0.645857	47.3298	45.7845	46.6495	1.58313	1.70127	2.23497					Q1-2	1.06089	46.5879	1.83979		0.607347	0.774491	0.347293
Q1-4	1.55196	1.00725	0.687045	62.778	66.9398	27.4659	3.46478	0.413606	1.38043					Q1-4	1.08209	52.3946	1.75294		0.437287	21.6889	1.55932
Q2-1	1.01641	1.45236	1.25697	77.5421	74.8229	78.4133	0.939549	1.70199	3.42401					Q2-1	1.24191	76.9261	2.02185		0.218365	1.87281	1.27274
Q2-2	1.4706	0.552275	0.272187	51.7178	64.4945	70.2625	3.13441	1.8174	3.06735					Q2-2	0.76502	62.1582	2.67305		0.626892	9.49052	0.741778
Q2-3	1.0924	0.44505	1.08102	65.2507	69.4688	69.3563	2.93186	1.21766	1.62454					Q2-3	0.87282	68.0253	1.92468		0.370504	2.40351	0.895648
Q3-1	1.59658	0.311389	0.449936	64.8158	45.0301	49.729	0.788266	0.352331	1.26617					Q3-1	0.785967	53.1916	0.802256		0.705418	10.3373	0.45708
Q3-2	1.89931	0.941875	1.02496	35.3288	41.2674	31.8004	0.498806	0.671107	1.80245					Q3-2	1.28872	36.1322	0.990788		0.530421	4.78436	0.70818
Q3-4	1.53603	0.668748	1.72649	67.4017	57.581	75.1522	1.88749	0.55348	0.485177					Q3-4	1.31042	66.7116	0.975382		0.563807	8.80593	0.790645
Q4-1	1.00704	0.395685	0.75554	113.922	90.8625	97.0042	3.35966	3.2535	3.23991					Q4-1	0.719422	100.596	3.28436		0.307274	11.9422	0.0655652
Q4-2	1.71019	1.00489	0.139639	86.3162	94.0597	97.0142	2.89847	3.45925	2.11791					Q4-2	0.951573	92.4633	2.82521		0.786632	5.52475	0.673665
Q4-3	0.661131	1.57184	0.758278	104.491	84.8451	93.6935	4.13922	5.04044	4.33329					Q4-3	0.997085	94.3433	4.50432		0.500121	9.8392	0.474326
