# Supplementary material for: Contingency and chance erase necessity in the experimental evolution of ancestral proteins
Source: eLife. 2021 Jun 1;10:e67336. doi: 10.7554/eLife.67336 (PMC8282340; doi:10.7554/eLife.67336)
Supplement: Supplementary file 2. — For each sequence, the site, maximum likelihood (ML) amino acid state, and posterior probability (PP) are given, along with the highest posterior probability alternative (ALT) state and posterior probability for this alternative state. Locations of paralog-specific insertions are shown as gaps. For each reconstructed sequence, the average posterior probability for the maximum likelihood states and the alternative states is given, as are the number of sites where the posterior probability of a non-maximum likelihood state is greater than 0.2. Finally, the average, maximum, minimum, and variance among reconstructed ancestors are given for the average maximum likelihood posterior probability and the number of non-maximum likelihood states greater than 0.2 posterior probability. [file elife-67336-supp2.xlsx]

## Sheet: Sheet1
		AncMB0					AncMB1					AncB1					AncB2					AncB3					AncB4					AncB5					AncBCL2					AncBCL2-G					AncBCL2-O
	Site	ML AA	ML PP	ALT AA	ALT PP		ML AA	ML PP	ALT AA	ALT PP		ML AA	ML PP	ALT AA	ALT PP		ML AA	ML PP	ALT AA	ALT PP		ML AA	ML PP	ALT AA	ALT PP		ML AA	ML PP	ALT AA	ALT PP		ML AA	ML PP	ALT AA	ALT PP		ML AA	ML PP	ALT AA	ALT PP		ML AA	ML PP	ALT AA	ALT PP		ML AA	ML PP	ALT AA
	1	E	0.57	D	0.339		E	0.526	D	0.37		E	0.504	D	0.382		E	0.492	D	0.391		E	0.406	D	0.317		E	0.365	D	0.284		E	0.264	D	0.203		E	0.257	D	0.197		E	0.227	D	0.174		E	0.203	D
	2	E	0.369	D	0.246		E	0.333	D	0.198		E	0.308	K	0.2		E	0.292	K	0.227		E	0.25	K	0.178		E	0.232	K	0.157		E	0.185	D	0.131		E	0.182	D	0.129		E	0.168	D	0.122		E	0.157	D
	3	E	0.589	D	0.333		E	0.572	D	0.278		E	0.537	D	0.307		E	0.517	D	0.325		E	0.417	D	0.277		E	0.372	D	0.253		E	0.264	D	0.19		E	0.257	D	0.185		E	0.227	D	0.166		E	0.203	D
	4	I	0.683	V	0.314		I	0.893	V	0.106		I	0.881	V	0.112		I	0.876	V	0.114		I	0.704	V	0.187		I	0.626	V	0.214		I	0.439	V	0.257		I	0.426	V	0.258		I	0.374	V	0.261		I	0.332	V
	5	V	0.356	A	0.256		V	0.322	A	0.279		V	0.302	A	0.268		V	0.284	A	0.276		A	0.39	T	0.214		A	0.355	T	0.306		P	0.753	S	0.159		P	0.777	S	0.144		P	0.891	S	0.081		P	0.893	S
	6	E	0.449	D	0.396		E	0.445	D	0.276		E	0.371	D	0.285		E	0.337	D	0.301		S	0.396	T	0.227		S	0.479	T	0.143		Y	0.959	H	0.03		Y	0.964	H	0.025		Y	0.995	H	0.003		Y	0.999	F
	7	Q	0.906	E	0.087		Q	0.807	E	0.171		Q	0.55	E	0.237		Q	0.437	E	0.241		D	0.572	N	0.252		D	0.617	N	0.243		D	0.5	N	0.318		D	0.534	N	0.287		D	0.706	N	0.138		D	0.993	N
	8	A	0.85	T	0.144		A	0.83	T	0.158		S	0.778	A	0.14		S	0.925	Y	0.036		S	0.999	T	0.001		S	0.997	N	0.002		S	0.879	N	0.121		S	0.868	N	0.132		S	0.819	N	0.18		N	0.992	S
	9	K	0.521	R	0.407		K	0.465	R	0.458		R	0.539	K	0.431		R	0.645	K	0.338		R	0.989	K	0.01		R	0.994	K	0.006		R	0.999	K	0.001		R	0.997	K	0.002		R	0.998	K	0.002		R	1	A
	10	N	0.558	S	0.138		N	0.882	D	0.043		N	0.915	D	0.028		N	0.913	S	0.034		N	0.849	S	0.07		N	0.69	S	0.113		E	0.788	D	0.185		E	0.787	D	0.187		E	0.808	D	0.177		E	0.731	D
	11	L	0.999	A	0		L	1	A	0		L	0.995	I	0.005		L	0.995	I	0.005		L	1	A	0		L	0.978	I	0.018		L	0.992	I	0.007		L	0.992	I	0.008		L	0.942	I	0.054		I	0.992	L
	12	V	0.741	C	0.075		V	0.919	A	0.062		V	0.972	I	0.02		V	0.985	I	0.012		V	1	A	0		V	0.999	I	0.001		V	1	A	0		V	1	A	0		V	0.999	I	0.001		V	1	A
	13	K	0.694	R	0.282		K	0.863	R	0.137		K	0.901	R	0.091		K	0.896	R	0.078		E	0.6	A	0.15		E	0.591	A	0.148		E	0.582	A	0.128		V	0.299	E	0.292		V	0.294	L	0.13		V	0.29	L
	14	D	0.893	N	0.078		D	0.98	N	0.019		D	0.997	N	0.002		D	1	A	0		D	1	A	0		D	0.999	A	0		D	0.997	E	0.002		D	0.981	E	0.009		D	0.294	K	0.213		K	0.99	Q
	15	Y	0.923	F	0.077		Y	1	A	0		Y	1	A	0		Y	1	A	0		Y	1	A	0		Y	1	A	0		Y	0.969	F	0.031		Y	0.992	F	0.008		Y	1	A	0		Y	1	A
	16	I	0.97	V	0.012		I	1	A	0		I	0.998	V	0.002		I	0.996	V	0.004		I	0.993	V	0.007		I	0.981	V	0.019		I	0.999	V	0.001		I	0.999	V	0.001		I	0.987	L	0.007		I	1	A
	17	H	0.762	N	0.091		H	0.683	S	0.183		H	0.612	S	0.204		H	0.509	S	0.252		H	0.408	N	0.249		H	0.352	F	0.242		H	0.521	S	0.236		H	0.536	S	0.228		H	0.759	Y	0.194		H	0.995	Y
	18	S	0.246	N	0.225		Y	0.998	H	0.002		Y	0.998	H	0.001		Y	1	A	0		Y	1	A	0		Y	1	A	0		Y	1	A	0		Y	1	A	0		Y	0.998	H	0.001		Y	0.984	H
	19	R	0.999	K	0.001		R	0.999	K	0.001		R	0.999	K	0.001		R	0.997	K	0.003		R	0.998	K	0.002		K	0.945	R	0.055		K	1	A	0		K	0.999	R	0.001		K	0.989	R	0.011		K	1	A
	20	L	0.996	M	0.002		L	1	A	0		L	1	A	0		L	1	A	0		L	1	A	0		L	0.999	A	0		L	1	A	0		L	1	A	0		L	0.999	A	0		L	1	A
	21	R	0.472	K	0.273		R	0.893	K	0.099		R	0.945	K	0.049		R	0.97	K	0.027		R	0.946	K	0.019		S	0.389	R	0.279		S	0.979	G	0.009		S	0.978	G	0.011		S	0.995	A	0.001		S	0.991	L
	22	E	0.745	K	0.148		K	0.98	E	0.015		K	0.982	E	0.013		K	0.979	E	0.015		K	0.993	E	0.005		K	0.511	E	0.229		P	0.689	A	0.156		P	0.691	A	0.16		A	0.477	P	0.273		A	0.991	P
	23	V	0.944	I	0.056		V	0.989	I	0.011		V	0.99	I	0.009		V	0.987	I	0.01		V	0.999	I	0.001		V	0.988	I	0.007		V	0.964	L	0.032		V	0.966	L	0.03		V	0.944	L	0.043		V	0.953	L
	24	S	0.61	A	0.335		S	0.645	A	0.354		S	0.644	A	0.353		S	0.615	A	0.375		H	0.561	S	0.249		H	0.887	N	0.1		H	0.998	Q	0.002		H	0.997	Q	0.003		H	1	A	0		H	1	A
	25	R	0.529	K	0.328		R	0.49	K	0.454		R	0.543	K	0.405		R	0.618	K	0.345		R	0.808	K	0.093		R	0.926	K	0.054		R	0.973	Q	0.015		R	0.969	Q	0.015		R	0.903	K	0.049		R	0.442	L
	26	T	0.573	R	0.242		T	0.998	R	0.001		T	0.997	A	0.001		T	0.999	A	0		T	0.995	A	0.003		T	0.733	A	0.19		A	0.86	T	0.103		A	0.847	T	0.106		A	0.417	V	0.376		T	0.404	V
	27	L	1	A	0		L	1	A	0		L	0.999	M	0.001		L	0.993	M	0.007		M	0.997	L	0.003		M	0.998	L	0.002		M	0.83	L	0.17		M	0.825	L	0.175		L	0.943	M	0.056		L	0.998	M
	28	R	0.92	Q	0.046		R	0.999	K	0.001		R	0.998	K	0.002		R	0.999	A	0		R	1	A	0		R	1	A	0		R	1	A	0		R	1	A	0		R	1	A	0		R	1	A
	29	R	0.372	K	0.366		K	0.461	R	0.46		K	0.452	R	0.449		R	0.464	K	0.436		A	0.419	E	0.231		E	0.785	A	0.079		E	0.901	A	0.059		E	0.896	A	0.059		E	0.911	Q	0.062		E	0.667	Q
	30	I	0.883	V	0.116		V	0.624	I	0.343		V	0.67	I	0.253		V	0.619	L	0.209		L	0.99	V	0.005		L	0.988	V	0.006		A	0.989	S	0.006		A	0.987	S	0.008		A	0.984	V	0.013		A	1	R
	31	G	0.846	A	0.149		A	0.935	G	0.064		A	0.734	G	0.266		A	0.727	G	0.272		G	1	A	0		G	1	A	0		G	1	A	0		G	1	A	0		G	1	A	0		G	1	A
	32	D	0.941	E	0.048		D	0.972	N	0.025		D	0.974	N	0.025		D	0.984	N	0.015		D	1	A	0		D	0.997	E	0.003		D	1	A	0		D	0.999	E	0.001		D	0.998	E	0.001		D	1	A
	33	E	0.994	D	0.003		E	1	A	0		E	0.999	D	0.001		E	0.999	D	0.001		E	1	A	0		E	0.993	Q	0.003		E	1	A	0		E	0.999	D	0.001		E	0.985	D	0.01		E	0.998	D
	34	L	0.999	I	0.001		L	0.996	M	0.002		L	0.994	F	0.003		L	0.98	F	0.017		F	1	A	0		F	0.999	Y	0.001		F	1	A	0		F	1	A	0		F	1	A	0		F	0.995	I
	35	E	0.809	D	0.191		E	1	A	0		E	1	A	0		E	1	A	0		E	1	A	0		E	1	A	0		E	1	A	0		E	0.999	D	0.001		E	0.981	D	0.009		S	0.992	E
	36	E	0.392	D	0.137		E	0.769	D	0.092		E	0.75	D	0.078		E	0.745	A	0.098		E	0.814	A	0.066		E	0.729	K	0.065		R	0.553	S	0.175		R	0.809	S	0.057		R	0.973	K	0.015		R	0.999	K
	37	K	0.616	R	0.135		K	0.892	R	0.098		K	0.876	R	0.112		K	0.809	R	0.156		R	0.981	K	0.019		R	0.995	K	0.005		R	1	A	0		R	0.999	K	0.001		R	0.98	Q	0.015		R	0.994	M
	38	Y	1	A	0		Y	0.998	H	0.002		Y	0.998	H	0.002		Y	0.997	H	0.003		Y	1	A	0		Y	1	A	0		Y	1	A	0		Y	1	A	0		Y	1	A	0		Y	1	A
	39	Q	0.887	R	0.047		Q	0.872	R	0.047		Q	0.559	R	0.31		Q	0.435	R	0.421		R	0.994	K	0.003		R	0.99	K	0.008		R	0.988	Q	0.009		R	0.951	Q	0.041		Q	0.921	R	0.071		Q	0.999	R
	40	D	0.649	E	0.217		D	0.703	E	0.23		D	0.826	E	0.166		D	0.853	E	0.145		D	0.877	E	0.122		D	0.604	E	0.38		R	0.906	Q	0.044		R	0.902	Q	0.047		R	0.9	Q	0.076		R	0.981	Q
	41	Q	0.589	E	0.334		Q	0.942	L	0.049		Q	0.931	L	0.057		Q	0.927	L	0.064		Q	0.963	L	0.025		Q	0.905	A	0.039		A	0.85	E	0.05		A	0.842	E	0.057		D	0.572	E	0.336		D	0.992	E
	42	L	0.791	F	0.206		F	1	A	0		F	1	A	0		F	1	A	0		F	1	A	0		F	1	A	0		F	1	A	0		F	1	A	0		F	1	A	0		F	1	A
	43	D	0.703	N	0.265		D	0.887	N	0.106		D	0.899	N	0.086		D	0.935	N	0.044		D	0.929	N	0.035		D	0.851	N	0.046		A	0.497	S	0.478		A	0.74	S	0.247		A	0.969	S	0.027		A	0.999	S
	44	N	0.819	D	0.173		N	0.791	D	0.208		N	0.803	D	0.194		N	0.789	D	0.201		D	0.977	E	0.015		D	0.94	E	0.058		D	0.932	E	0.067		D	0.846	E	0.142		D	0.727	E	0.259		E	0.837	Q
	45	M	0.989	L	0.004		M	1	A	0		M	1	A	0		M	1	A	0		M	1	A	0		M	0.986	L	0.014		M	0.561	L	0.437		M	0.566	L	0.43		M	0.803	L	0.127		M	0.996	I
	46	I	0.656	V	0.333		C	1	A	0		C	1	A	0		C	1	A	0		C	1	A	0		S	0.536	C	0.407		S	0.998	A	0.001		S	0.994	A	0.003		S	0.985	A	0.013		S	1	A
	47	D	0.686	N	0.173		D	0.858	N	0.095		D	0.892	N	0.068		D	0.911	N	0.066		D	0.908	N	0.083		D	0.878	N	0.074		S	0.554	A	0.307		S	0.518	A	0.329		S	0.392	G	0.283		G	0.993	S
	48	K	0.669	R	0.308		K	0.944	R	0.05		K	0.662	Q	0.255		Q	0.569	K	0.397		Q	0.998	K	0.002		Q	1	A	0		Q	1	A	0		Q	1	A	0		Q	1	A	0		Q	1	A
	49	L	0.999	A	0		L	1	A	0		L	1	A	0		L	1	A	0		L	1	A	0		L	1	A	0		L	1	A	0		L	1	A	0		L	0.987	M	0.013		L	1	A
	50	H	0.708	N	0.173		H	0.759	N	0.179		H	0.833	N	0.127		H	0.935	N	0.043		H	0.999	N	0.001		H	0.999	A	0		H	0.999	A	0		H	0.995	Q	0.004		H	0.989	R	0.008		H	1	A
BOK Specific Insertion	51
	52
	53
	54
	55
	56
	57
	58
	59	I	0.776	V	0.16		I	0.985	V	0.014		I	0.989	V	0.01		I	0.992	V	0.008		I	0.997	V	0.003		I	0.896	V	0.066		I	0.747	V	0.23		I	0.685	V	0.253		L	0.535	F	0.271		L	0.801	F
	60	T	0.937	S	0.058		T	0.965	S	0.035		T	0.996	S	0.004		T	1	A	0		T	1	A	0		T	0.999	S	0.001		T	0.997	S	0.003		T	0.992	S	0.006		T	0.988	A	0.005		T	1	A
	61	P	0.998	Q	0.001		P	1	A	0		P	1	A	0		P	1	A	0		P	1	A	0		P	1	A	0		P	1	A	0		P	1	A	0		P	1	A	0		P	1	A
	62	D	0.606	E	0.206		D	0.63	E	0.153		D	0.366	N	0.28		N	0.318	D	0.314		N	0.417	D	0.317		N	0.367	D	0.349		G	0.591	S	0.232		G	0.516	S	0.275		S	0.438	G	0.319		S	0.97	N
	63	T	0.989	A	0.004		T	1	A	0		T	1	A	0		T	1	A	0		T	1	A	0		T	1	A	0		T	1	A	0		T	0.999	A	0		T	0.987	S	0.011		T	1	A
	64	A	0.984	V	0.012		A	0.999	V	0.001		A	1	R	0		A	1	R	0		A	1	R	0		A	1	R	0		A	1	R	0		A	0.998	V	0.001		A	1	R	0		A	1	R
	65	Y	0.985	C	0.006		Y	1	A	0		Y	1	A	0		Y	1	A	0		Y	1	A	0		Y	0.995	H	0.004		Y	0.91	H	0.06		R	0.778	Y	0.117		R	0.981	H	0.012		R	0.999	H
	66	D	0.5	E	0.3		P	0.653	A	0.176		P	0.988	A	0.006		P	0.999	A	0		P	0.999	Q	0.001		Q	0.691	P	0.243		Q	0.84	P	0.044		Q	0.589	G	0.116		G	0.498	R	0.279		G	0.544	R
	67	T	0.992	A	0.005		T	1	A	0		T	1	A	0		T	1	A	0		T	1	A	0		T	0.43	K	0.281		R	0.996	K	0.004		R	0.997	K	0.003		R	0.992	K	0.008		R	0.952	K
	68	F	1	A	0		F	1	A	0		F	1	A	0		F	1	A	0		F	1	A	0		F	0.997	Y	0.003		F	1	A	0		F	1	A	0		F	1	A	0		F	1	A
	69	T	0.351	A	0.2		T	0.361	V	0.243		T	0.349	V	0.27		T	0.351	V	0.268		T	0.529	A	0.136		T	0.438	A	0.207		A	0.864	T	0.074		A	0.854	T	0.075		A	0.847	T	0.073		A	0.865	T
	70	G	0.567	N	0.209		G	0.66	N	0.155		G	0.843	S	0.057		G	0.855	S	0.063		G	0.641	A	0.203		G	0.321	E	0.15		E	0.648	D	0.128		E	0.605	A	0.156		A	0.93	E	0.037		A	0.998	T
	71	V	0.998	I	0.002		V	1	A	0		V	0.999	I	0.001		V	0.997	I	0.003		V	1	A	0		V	0.998	I	0.002		V	1	A	0		V	1	A	0		V	1	A	0		V	1	A
	72	A	0.999	R	0		A	1	R	0		A	0.996	V	0.004		A	0.997	V	0.003		A	0.934	V	0.065		A	0.813	V	0.183		A	0.704	V	0.294		A	0.677	V	0.319		A	0.655	V	0.344		V	0.895	A
	73	K	0.532	N	0.247		K	0.62	N	0.361		N	0.806	K	0.169		N	0.845	K	0.123		N	0.994	D	0.006		N	0.794	D	0.145		D	0.761	N	0.17		D	0.774	E	0.125		E	0.821	D	0.173		E	0.994	D
	74	E	0.96	Q	0.033		E	1	A	0		E	1	A	0		E	1	A	0		E	1	A	0		E	0.996	D	0.004		E	1	A	0		E	1	A	0		E	0.999	D	0.001		E	1	A
BFL1 Specific Insertion	75
	76	L	0.971	I	0.018		L	0.977	M	0.021		L	0.984	M	0.011		L	0.974	I	0.017		L	1	A	0		L	1	A	0		L	1	A	0		L	1	A	0		L	1	A	0		L	1	A
	77	F	1	A	0		F	1	A	0		F	1	A	0		F	1	A	0		F	1	A	0		F	1	A	0		F	1	A	0		F	1	A	0		F	1	A	0		F	1	A
	78	R	0.758	Q	0.097		R	0.566	S	0.333		R	0.535	S	0.347		R	0.521	S	0.338		R	0.549	S	0.387		R	0.923	K	0.031		R	0.998	Q	0.001		R	0.998	Q	0.001		R	0.998	K	0.001		R	0.999	A
	79	D	0.982	N	0.015		D	0.999	N	0.001		D	0.956	N	0.013		D	0.952	N	0.014		D	0.996	E	0.004		D	0.986	E	0.014		D	1	A	0		D	1	A	0		D	0.999	A	0		D	1	A
	80	G	1	A	0		G	1	A	0		G	1	A	0		G	1	A	0		G	1	A	0		G	1	A	0		G	1	A	0		G	1	A	0		G	1	A	0		G	1	A
BAX Specific Insertion	81
MCL1/NRH/BFL1 Specific Insertion	82
	83	I	0.998	V	0.002		I	1	A	0		I	1	A	0		I	0.999	V	0.001		I	0.996	V	0.004		V	0.684	I	0.316		V	0.997	I	0.003		V	0.997	I	0.002		V	0.995	I	0.005		V	1	A
	84	T	0.945	N	0.055		N	1	A	0		N	1	A	0		N	1	A	0		N	1	A	0		N	0.987	K	0.012		N	1	A	0		N	1	A	0		N	1	A	0		N	1	A
	85	W	1	A	0		W	1	A	0		W	1	A	0		W	1	A	0		W	1	A	0		W	1	A	0		W	1	A	0		W	1	A	0		W	1	A	0		W	1	A
	86	G	1	A	0		G	1	A	0		G	1	A	0		G	1	A	0		G	1	A	0		G	1	A	0		G	1	A	0		G	1	A	0		G	1	A	0		G	1	A
	87	R	1	A	0		R	1	A	0		R	1	A	0		R	1	A	0		R	1	A	0		R	1	A	0		R	1	A	0		R	1	A	0		R	1	A	0		R	1	A
	88	I	0.985	V	0.015		I	1	A	0		I	1	A	0		I	1	A	0		I	0.999	V	0.001		I	0.954	V	0.045		I	0.924	V	0.076		I	0.921	V	0.079		I	0.957	V	0.043		I	1	A
	89	V	0.998	I	0.001		V	1	A	0		V	1	A	0		V	1	A	0		V	1	A	0		V	0.998	I	0.002		V	1	A	0		V	1	A	0		V	1	A	0		V	1	A
	90	A	0.999	R	0		A	1	R	0		A	1	R	0		A	1	R	0		A	1	R	0		A	1	R	0		A	1	R	0		A	1	R	0		A	1	R	0		A	1	R
	91	L	1	A	0		L	1	A	0		L	0.991	F	0.009		L	0.992	F	0.008		L	1	A	0		L	0.998	F	0.002		F	1	A	0		F	1	A	0		F	1	A	0		F	1	A
	92	F	0.999	L	0.001		F	1	A	0		F	0.999	A	0		F	0.999	L	0.001		F	1	A	0		F	0.99	L	0.009		F	1	A	0		F	1	A	0		F	1	A	0		F	1	A
	93	A	0.97	V	0.011		A	1	R	0		A	0.996	T	0.003		A	0.994	T	0.006		A	1	R	0		A	0.999	V	0.001		A	0.996	V	0.004		A	0.993	V	0.006		A	0.724	V	0.134		E	0.998	A
	94	F	1	A	0		F	1	A	0		F	1	A	0		F	1	A	0		F	1	A	0		F	1	A	0		F	1	A	0		F	1	A	0		F	1	A	0		F	1	A
	95	G	0.994	A	0.003		G	0.982	S	0.016		G	0.982	S	0.018		G	0.985	S	0.015		G	0.963	S	0.037		G	0.945	S	0.037		G	1	A	0		G	1	A	0		G	1	A	0		G	1	A
	96	G	0.817	Y	0.164		G	1	A	0		G	1	A	0		G	1	A	0		G	1	A	0		G	1	A	0		G	0.999	A	0.001		G	1	A	0		G	1	A	0		G	1	A
	97	A	0.841	R	0.09		A	0.983	R	0.009		A	0.978	R	0.009		A	0.983	T	0.012		A	0.999	R	0		A	0.999	T	0.001		A	0.995	T	0.005		A	0.968	T	0.03		T	0.832	A	0.154		T	0.871	A
	98	L	0.999	A	0		L	1	A	0		L	1	A	0		L	1	A	0		L	1	A	0		L	1	A	0		L	1	A	0		L	0.999	M	0.001		L	0.942	M	0.057		M	0.998	L
	99	A	1	R	0		A	1	R	0		A	1	R	0		A	1	R	0		A	1	R	0		A	0.977	T	0.019		C	1	A	0		C	1	A	0		C	1	A	0		C	1	A
	100	V	0.843	I	0.137		V	0.948	I	0.052		V	0.952	I	0.048		V	0.969	I	0.03		V	0.998	I	0.002		V	0.994	I	0.005		V	0.982	A	0.017		V	0.979	A	0.019		V	0.994	I	0.004		V	0.999	I
	101	H	0.886	N	0.037		H	1	A	0		H	1	A	0		H	0.998	Q	0.002		Q	0.638	H	0.362		Q	0.617	H	0.235		E	0.998	D	0.001		E	0.999	A	0		E	0.999	A	0		E	1	A
	102	C	0.988	V	0.009		C	1	A	0		C	1	A	0		C	1	A	0		C	1	A	0		C	0.996	S	0.004		C	0.867	S	0.133		C	0.865	S	0.135		S	0.968	C	0.031		S	1	A
	103	V	0.803	I	0.183		V	0.926	A	0.035		V	0.937	A	0.037		V	0.952	A	0.035		V	0.998	I	0.002		V	0.989	I	0.011		V	0.997	I	0.002		V	0.996	I	0.003		V	0.98	A	0.014		V	0.999	I
	104	K	0.723	E	0.101		K	0.569	E	0.398		E	0.461	K	0.45		E	0.715	K	0.165		E	0.964	D	0.035		E	0.896	D	0.104		D	0.919	N	0.043		D	0.89	N	0.075		N	0.755	D	0.182		N	0.997	D
	105	Q	0.727	K	0.216		K	0.897	R	0.059		K	0.922	R	0.057		K	0.928	R	0.062		K	0.974	R	0.026		K	0.924	R	0.075		K	0.971	R	0.029		K	0.936	R	0.064		R	0.835	K	0.163		R	0.996	K
	106	G	0.999	A	0		G	1	A	0		G	0.873	D	0.066		D	0.461	E	0.436		E	0.496	D	0.484		E	0.646	D	0.349		E	0.984	D	0.016		E	0.982	D	0.018		E	0.947	D	0.053		E	0.998	D
NRH Specific Insertion	107
	108
	109
	110
	111	M	0.656	I	0.145		M	1	A	0		M	1	A	0		M	1	A	0		M	1	A	0		M	1	A	0		M	1	A	0		M	0.999	L	0.001		M	1	A	0		M	1	A
	112	P	1	A	0		P	1	A	0		P	1	A	0		P	1	A	0		P	1	A	0		P	1	A	0		P	0.461	S	0.307		P	0.463	S	0.305		S	0.433	A	0.299		S	0.64	T
	113	D	0.607	E	0.363		D	0.739	E	0.26		E	0.535	D	0.442		E	0.617	D	0.32		Q	0.732	H	0.146		Q	0.81	H	0.082		P	0.946	S	0.048		P	0.945	S	0.049		P	0.956	S	0.043		P	0.951	S
BAK Specific Insertion	114
NRH Specific Insertion	115
	116	F	0.664	L	0.326		F	0.583	L	0.394		F	0.538	L	0.445		L	0.647	F	0.343		L	0.898	F	0.102		L	0.892	F	0.106		L	0.999	A	0		L	0.999	A	0		L	0.999	A	0		L	0.988	Q
	117	V	0.924	I	0.074		V	0.996	I	0.004		V	0.998	I	0.002		V	0.997	I	0.003		V	1	A	0		V	0.999	I	0.001		V	1	A	0		V	0.999	I	0.001		V	0.991	I	0.009		V	1	A
	118	K	0.434	R	0.263		E	0.612	D	0.344		D	0.489	E	0.471		D	0.66	E	0.324		D	0.994	E	0.006		D	0.99	E	0.009		D	0.918	G	0.053		D	0.92	G	0.047		D	0.985	E	0.009		D	0.999	E
	119	N	0.469	K	0.338		N	0.995	K	0.003		N	0.995	S	0.003		N	0.997	H	0.001		N	0.997	S	0.001		N	0.953	R	0.018		N	0.932	R	0.031		N	0.966	S	0.015		N	0.974	S	0.023		N	0.963	S
	120	I	0.998	V	0.002		I	0.996	V	0.004		I	0.995	V	0.005		I	0.998	V	0.002		I	0.999	V	0.001		I	0.998	V	0.002		I	0.999	V	0.001		I	0.997	V	0.003		I	0.999	V	0.001		I	1	A
	121	V	0.748	I	0.248		V	0.937	I	0.043		V	0.964	I	0.028		V	0.988	I	0.011		V	0.999	I	0.001		V	0.99	A	0.006		A	0.996	V	0.003		A	0.998	V	0.001		A	0.999	R	0		A	1	R
	122	D	0.791	E	0.17		D	0.877	E	0.12		D	0.865	E	0.131		D	0.862	E	0.136		D	0.965	E	0.034		D	0.956	E	0.028		D	0.856	N	0.098		D	0.616	N	0.21		N	0.336	D	0.304		N	0.423	D
	123	W	1	A	0		W	1	A	0		W	1	A	0		W	1	A	0		W	1	A	0		W	1	A	0		W	1	A	0		W	1	A	0		W	1	A	0		W	1	A
	124	V	0.952	I	0.042		V	0.936	I	0.06		V	0.863	I	0.136		V	0.738	I	0.261		V	0.702	I	0.293		V	0.612	I	0.295		M	1	A	0		M	1	A	0		M	1	A	0		M	1	A
	125	A	0.684	V	0.248		A	0.901	T	0.098		A	0.862	T	0.125		A	0.761	T	0.191		T	0.978	S	0.017		T	0.983	S	0.011		T	0.998	A	0.002		T	0.999	A	0.001		T	1	A	0		T	1	A
	126	K	0.855	R	0.099		K	0.886	R	0.072		K	0.786	R	0.161		K	0.739	R	0.18		K	0.316	T	0.3		T	0.29	Q	0.263		T	0.739	S	0.085		T	0.652	A	0.131		A	0.463	T	0.256		E	0.964	D
	127	F	0.885	Y	0.115		F	0.694	Y	0.306		Y	0.933	F	0.067		Y	0.964	F	0.036		Y	1	A	0		Y	1	A	0		Y	1	A	0		Y	1	A	0		Y	1	A	0		Y	1	A
	128	I	0.967	V	0.033		I	0.975	V	0.024		I	0.963	M	0.028		I	0.968	M	0.028		I	0.993	M	0.006		I	0.953	L	0.036		L	0.999	I	0.001		L	1	A	0		L	1	A	0		L	1	A
	129	D	0.526	E	0.289		D	0.816	E	0.124		D	0.886	E	0.067		D	0.93	E	0.044		D	0.996	N	0.002		D	0.995	E	0.004		D	0.932	E	0.067		D	0.924	E	0.07		D	0.859	N	0.121		N	0.99	D
	130	D	0.392	N	0.332		N	0.516	D	0.348		N	0.598	D	0.305		N	0.624	D	0.299		N	0.993	D	0.007		N	0.989	D	0.007		N	0.844	D	0.091		N	0.796	D	0.107		S	0.397	N	0.332		G	0.496	R
	131	N	0.722	H	0.138		N	0.985	K	0.013		N	0.987	K	0.012		N	0.999	K	0.001		N	1	A	0		N	0.998	S	0.001		N	0.964	H	0.017		N	0.818	H	0.089		N	0.511	S	0.248		H	0.688	P
BAK Specific Insertion	132
	133	L	0.997	I	0.002		L	1	A	0		L	1	A	0		L	1	A	0		L	1	A	0		L	1	A	0		L	1	A	0		L	1	A	0		L	1	A	0		L	1	A
	134	A	0.696	S	0.264		S	0.869	A	0.128		S	0.964	A	0.034		S	0.977	A	0.02		S	0.97	N	0.017		S	0.808	A	0.141		Q	0.94	R	0.026		Q	0.943	R	0.022		Q	0.95	R	0.012		Q	0.991	H
	135	E	0.417	Q	0.292		E	0.62	Q	0.19		E	0.426	Q	0.331		Q	0.421	E	0.335		Q	0.805	P	0.141		Q	0.785	P	0.099		D	0.499	N	0.276		D	0.438	N	0.347		N	0.695	D	0.265		N	0.994	D
	136	W	1	A	0		W	1	A	0		W	1	A	0		W	1	A	0		W	1	A	0		W	1	A	0		W	1	A	0		W	1	A	0		W	1	A	0		W	1	A
	137	I	1	A	0		I	1	A	0		I	1	A	0		I	1	A	0		I	1	A	0		I	0.999	L	0.001		I	1	A	0		I	0.999	V	0.001		I	1	A	0		I	1	A
	138	K	0.514	Q	0.185		K	0.556	Q	0.252		K	0.486	Q	0.246		K	0.442	N	0.249		N	0.453	Q	0.323		Q	0.682	N	0.14		Q	0.987	H	0.004		Q	0.982	E	0.005		Q	0.974	R	0.015		Q	1	A
	139	E	0.853	Q	0.069		E	0.898	D	0.049		E	0.934	D	0.045		E	0.957	D	0.039		E	0.936	D	0.064		E	0.944	D	0.049		E	0.796	D	0.143		E	0.751	D	0.217		E	0.671	D	0.302		E	0.585	D
	140	Q	0.579	H	0.406		H	0.869	N	0.119		N	0.795	H	0.204		N	0.832	H	0.168		N	0.826	H	0.174		N	0.985	H	0.015		N	1	A	0		N	1	A	0		N	1	A	0		N	1	A
	141	G	1	A	0		G	1	A	0		G	1	A	0		G	1	A	0		G	1	A	0		G	1	A	0		G	1	A	0		G	1	A	0		G	1	A	0		G	1	A
	142	G	1	A	0		G	1	A	0		G	1	A	0		G	1	A	0		G	1	A	0		G	1	A	0		G	1	A	0		G	1	A	0		G	0.999	D	0.001		G	1	A
	143	W	1	A	0		W	1	A	0		W	1	A	0		W	1	A	0		W	1	A	0		W	1	A	0		W	1	A	0		W	1	A	0		W	1	A	0		W	1	A
	144	D	0.678	E	0.159		D	0.971	E	0.029		D	0.982	E	0.018		D	0.985	E	0.014		D	0.977	E	0.022		D	0.915	E	0.083		D	0.964	E	0.021		D	0.962	E	0.023		D	0.989	E	0.009		D	0.999	E
	145	G	0.969	A	0.02		G	1	A	0		G	1	A	0		G	1	A	0		G	1	A	0		G	0.998	A	0.002		A	0.981	G	0.009		A	0.981	S	0.01		A	0.998	S	0.001		A	1	R
	146	F	0.731	L	0.237		F	1	A	0		F	1	A	0		F	1	A	0		F	1	A	0		F	1	A	0		F	1	A	0		F	0.999	A	0		F	1	A	0		F	1	A
	147	V	0.637	I	0.193		V	0.836	I	0.148		V	0.829	I	0.153		V	0.838	I	0.151		V	0.986	I	0.014		V	0.972	I	0.023		V	0.986	I	0.012		V	0.983	I	0.014		V	0.987	I	0.012		V	0.998	I
	148	E	0.75	D	0.108		E	0.843	K	0.076		E	0.842	D	0.125		E	0.831	D	0.148		E	0.869	D	0.128		E	0.801	D	0.195		E	0.82	D	0.15		E	0.822	D	0.147		E	0.888	D	0.109		E	0.995	D
	149	H	0.971	Y	0.026		H	0.999	Y	0.001		H	0.935	Y	0.045		F	0.427	H	0.412		F	0.999	Y	0.001		F	0.981	L	0.018		L	0.965	F	0.033		L	0.966	F	0.031		L	0.996	F	0.003		L	1	A
	150	F	0.998	L	0.001		F	1	A	0		F	0.997	Y	0.003		F	0.989	Y	0.011		Y	0.997	F	0.003		Y	0.998	F	0.002		Y	1	A	0		Y	0.999	H	0.001		Y	1	A	0		Y	1	A
	151	K	0.42	N	0.242		N	0.415	K	0.33		N	0.307	K	0.266		E	0.293	N	0.272		E	0.775	D	0.191		E	0.481	G	0.192		G	0.998	E	0.001		G	0.999	A	0		G	1	A	0		G	1	A
Average PP			0.802609		0.122835			0.879353		0.0851654			0.870368		0.0884812			0.866098		0.0896767			0.904925		0.0540602			0.873474		0.067609			0.904624		0.0539023			0.895218		0.0582556			0.878609		0.0661579			0.928662
# of Alt States > 0.2					21					21					26					29					16					19					12					14					18
	ML PP	# Alt States >0.2
Average	0.856703	24.087
Maximum	0.976429	44
Minimum	0.731707	4
Variance	0.00462301	143.992
[truncated: 53 more columns]
