# Supplementary material for: Contingency and chance erase necessity in the experimental evolution of ancestral proteins
Source: eLife. 2021 Jun 1;10:e67336. doi: 10.7554/eLife.67336 (PMC8282340; doi:10.7554/eLife.67336)
Supplement: Supplementary file 3. — fs is frameshift, aa is amino acid, co is codon change. [file elife-67336-supp3.xlsx]

## Sheet: List of PACE Experiments
Library code	Starting phage	Purpose	Chemostat A Plasmids	Chemostat B Plasmids	# of lagoons
B	pH4	hsBCL-2 for NOXA	28-46/29-39/6-65	28-48/29-39/6-65	4
C	26-51	AncB4 for NOXA	28-46/29-39/6-65	28-48/29-39/6-65	4
D	26-52	AncB5 for NOXA	28-46/29-39/6-65	28-48/29-39/6-65	3
I	26-51, 26-52	AncB4 and AncB5 for BID	28-46/29-39/6-65	-	3 for each
J	26-17	AncM6 against NOXA	28-46/29-39/6-65	28-46/Jin487/6-65	4
K	30-79, 30-80	AncMB1_M and AncMB1_B against NOXA	28-46/29-39/6-65	28-46/Jin487/6-65	2 for each
L	31-53	hsMCL-1 against NOXA	28-46/29-39/6-65	28-46/Jin487/6-65	4
M	30-81	AncB1 against NOXA	28-46/29-39/6-65	28-46/Jin487/6-65	4
P	pH4	hsBCL-2 for BID	28-46/29-39/6-65	-	4
Q	32-50, 32-51, 32-52, 32-53	evolved hsBCL-2 variants against NOXA	28-46/29-39/6-65	28-46/Jin487/6-65	1 for each
W	31-53, 32-50, 32-52	hsMCL-1 and two hsBCL-2 variants against BID	28-48/29-39/6-65	28-48/Jin 518/6-65	2 for hsMCL-1, 1 for each evolved hsBCL-2 variant
X	pH4	hsBCL-2 against NOXA	28-46/Jin487/6-65	-	4

## Sheet: Alignment Vertical
Global	hsBCL-2	hsBCL-2 Seq	hsMCL-1 Seq	hsMCL-1	Global
1	1	A	E	1	1
2	2	H	A	2	2
3	3	A	P	3	3
4	4	G	A	4	4
5	5	R	A	5	5
6	6	T	D	6	6
7		-	A	7	7
8		-	I	8	8
9		-	M	9	9
10		-	S	10	10
11		-	P	11	11
12		-	E	12	12
13		-	E	13	13
14		-	E	14	14
15		-	L	15	15
16		-	D	16	16
17		-	G	17	17
18		-	Y	18	18
19		-	E	19	19
20		-	P	20	20
21		-	E	21	21
22		-	P	22	22
23		-	L	23	23
24		-	G	24	24
25		-	K	25	25
26		-	R	26	26
27		-	P	27	27
28		-	A	28	28
29		-	V	29	29
30		-	L	30	30
31		-	P	31	31
32		-	L	32	32
33		-	L	33	33
34		-	E	34	34
35		-	L	35	35
36		-	V	36	36
37		-	G	37	37
38		-	E	38	38
39		-	S	39	39
40		-	G	40	40
41		-	N	41	41
42		-	N	42	42
43		-	T	43	43
44		-	S	44	44
45		-	T	45	45
46		-	D	46	46
47		-	G	47	47
48		-	S	48	48
49		-	L	49	49
50		-	P	50	50
51		-	S	51	51
52		-	T	52	52
53		-	P	53	53
54		-	P	54	54
55		-	P	55	55
56		-	A	56	56
57		-	E	57	57
58		-	E	58	58
59		-	E	59	59
60		-	E	60	60
61		-	D	61	61
62		-	E	62	62
63		-	L	63	63
64	7	G	Y	64	64
65	8	Y	R	65	65
66	9	D	Q	66	66
67	10	N	S	67	67
68	11	R	L	68	68
69	12	E	E	69	69
70	13	I	I	70	70
71	14	V	I	71	71
72	15	M	S	72	72
73	16	K	R	73	73
74	17	Y	Y	74	74
75	18	I	L	75	75
76	19	H	R	76	76
77	20	Y	E	77	77
78	21	K	Q	78	78
79	22	L	A	79	79
80	23	S	T	80	80
81	24	Q	G	81	81
82	25	R	A	82	82
83	26	G	K	83	83
84	27	Y	D	84	84
85	28	E	T	85	85
86	29	W	K	86	86
87	30	D	P	87	87
88	31	A	M	88	88
89	32	G	G	89	89
90	33	D	R	90	90
91	34	V	S	91	91
92	35	G	G	92	92
93	36	A	A	93	93
94	37	A	T	94	94
95	38	P	S	95	95
96	39	P	R	96	96
97	40	G	-		97
98	41	A	-		98
99	42	A	-		99
100	43	P	-		100
101	44	A	-		101
102	45	P	-		102
103	46	G	-		103
104	47	I	-		104
105	48	F	-		105
106	49	S	-		106
107	50	S	-		107
108	51	Q	-		108
109	52	P	-		109
110	53	G	-		110
111	54	H	-		111
112	55	T	-		112
113	56	P	-		113
114	57	H	-		114
115	58	P	-		115
116	59	A	-		116
117	60	A	-		117
118	61	S	-		118
119	62	R	-		119
120	63	D	-		120
121	64	P	-		121
122	65	V	-		122
123	66	A	-		123
124	67	R	-		124
125	68	T	-		125
126	69	S	-		126
127	70	P	-		127
128	71	L	-		128
129	72	Q	-		129
130	73	T	-		130
131	74	P	-		131
132	75	A	-		132
133	76	A	-		133
134	77	P	-		134
135	78	G	-		135
136	79	A	-		136
137	80	A	-		137
138	81	A	-		138
139	82	G	-		139
140	83	P	-		140
141	84	A	-		141
142	85	L	-		142
143	86	S	-		143
144	87	P	-		144
145	88	V	-		145
146	89	P	-		146
147	90	P	-		147
148	91	V	K	97	148
149	92	V	A	98	149
150	93	H	L	99	150
151	94	L	E	100	151
152	95	T	T	101	152
153	96	L	L	102	153
154	97	R	R	103	154
155	98	Q	R	104	155
156	99	A	V	105	156
157	100	G	G	106	157
158	101	D	D	107	158
159	102	D	G	108	159
160	103	F	V	109	160
161	104	S	Q	110	161
162	105	R	R	111	162
163	106	R	N	112	163
164	107	Y	H	113	164
165	108	R	E	114	165
166	109	R	T	115	166
167	110	D	A	116	167
168	111	F	F	117	168
169	112	A	Q	118	169
170	113	E	G	119	170
171	114	M	M	120	171
172	115	S	L	121	172
173	116	S	R	122	173
174	117	Q	K	123	174
175	118	L	L	124	175
176	119	H	D	125	176
177	120	L	I	126	177
178	121	T	K	127	178
179	122	P	N	128	179
180	123	F	E	129	180
181	124	T	D	130	181
182	125	A	D	131	182
183	126	R	V	132	183
184	127	G	K	133	184
185	128	R	S	134	185
186	129	F	L	135	186
187	130	A	S	136	187
188	131	T	R	137	188
189	132	V	V	138	189
190	133	V	M	139	190
191	134	E	I	140	191
192	135	E	H	141	192
193	136	L	V	142	193
194	137	F	F	143	194
195	138	R	S	144	195
196	139	D	D	145	196
197	140	G	G	146	197
198	141	V	V	147	198
199		-	T	148	199
200	142	N	N	149	200
201	143	W	W	150	201
202	144	G	G	151	202
203	145	R	R	152	203
204	146	I	I	153	204
205	147	V	V	154	205
206	148	A	T	155	206
207	149	F	L	156	207
208	150	F	I	157	208
209	151	E	S	158	209
210	152	F	F	159	210
211	153	G	G	160	211
212	154	G	A	161	212
213	155	V	F	162	213
214	156	M	V	163	214
215	157	C	A	164	215
216	158	V	K	165	216
217	159	E	H	166	217
218	160	S	L	167	218
219	161	V	K	168	219
220	162	N	T	169	220
221	163	R	I	170	221
222	164	E	N	171	222
223	165	M	Q	172	223
224	166	S	E	173	224
225	167	P	S	174	225
226	168	L	C	175	226
227	169	V	I	176	227
228	170	D	E	177	228
229	171	N	P	178	229
230	172	I	L	179	230
231	173	A	A	180	231
232	174	L	E	181	232
233	175	W	S	182	233
234	176	M	I	183	234
235	177	T	T	184	235
236	178	E	D	185	236
237	179	Y	V	186	237
238	180	L	L	187	238
239	181	N	V	188	239
240	182	R	R	189	240
241	183	H	T	190	241
242	184	L	K	191	242
243	185	H	R	192	243
244	186	T	D	193	244
245	187	W	W	194	245
246	188	I	L	195	246
247	189	Q	V	196	247
248	190	D	K	197	248
249	191	N	Q	198	249
250	192	G	R	199	250
251	193	G	G	200	251
252	194	W	W	201	252
253	195	D	D	202	253
254	196	A	G	203	254
255	197	F	F	204	255
256	198	V	V	205	256
257	199	E	E	206	257
258	200	L	F	207	258
259	201	Y	F	208	259
260	202	G	H	209	260
261	203	P	V	210	261
262	204	S	E	211	262
263	205	M	D	212	263
264	206	R	L	213	264
265	207	P	E	214	265
266	208	L	G	215	266
267	209	F	G	216	267
268	210	D	I	217	268
269	211	F	R	218	269
270	212	S
271	213	W
272	214	L
273	215	S
274	216	L
275	217	K

## Sheet: B PACE
	hsBCL-2
Global	84	94	106	108	130	136	145	157	159	163	165	169	172	173	180	182	218	233	262	271
hsBCL-2 seq	27	37	49	51	73	79	88	100	102	106	108	112	115	116	123	125	160	175	204	213
hsBCL-2 AA	Y	A	S	Q	T	A	V	G	D	R	R	A	S	S	F	A	S	W	S	W
B1-1				R				S		L					L				FS, 8 AA less
B1-2					P	A(co)					L								FS, 8 AA less
B1-3											L								FS, 8 AA less
B2-1	H										L									*amber
B2-2	H									L	L		F							*amber
B2-3	H										L						I			*amber
B3-1			P						G										I	*amber
B3-2			P				E		G										I	*amber
B3-4			P						G										I	*amber
B4-1											L			S(co)		E			FS, 8 AA less
B4-2											L	D	F						FS, 8 AA less
B4-3		S									L							G	FS, 8 AA less

## Sheet: C PACE
		AncB4
Global	75	91	93	94	112	149	160	168	172	181	182	183	191	196	202	207	239	243	249	259	260	261	266	271
AncB4	18	34	36	37	55	92	103	111	115	124	125	126	134	139	144	149	181	185	191	201	202	203	208	213
AncB4 AA	I	V	A	A	T	V	F	F	S	T	A	Y	N	D	G	L	D	S	N	Y	E	P	L	W
C1-1					T (co)	V (co)					T	H							D
C1-2	V									T (co)						F						FS, 1 AA less
C1-3				A (co)								H										FS, 1 AA less
C2-1												C									*amber
C2-2			T	T					L			C		Y				S (co)			*amber
C2-3												C									*amber
C3-1							L						H		G (co)									*amber
C3-2							L						H											*amber
C3-3							L						H				N							*amber
C4-1
C4-2		V (co)						L				H											FS, 8 AA less
C4-3												H								F

## Sheet: D PACE
	AncB5
Global	86	97	110	120	141	147	172	183	187	188	234	248	256	258	262	267	271
AncB5	29	40	53	63	84	90	115	126	130	131	176	190	198	200	204	209	213
AncB5 AA	W	G	G	D	A	P	S	Y	A	E	M	E	V	L	S	F	W
D1-1		G (co)	G (co)		T			H						F
D1-2		G (co)			T			H					V (co)	F			*opal
D1-3		G (co)			T			H						F
D2-1						L	P			G					FS, 1 AA less
D2-2							F			G					FS, 1 AA less
D2-3							P			G					FS, 1 AA less
D3-1									T	G							*opal
D3-2									T	G	I					FS, 2 AA less
D3-3				Y					T	G		K					*opal

## Sheet: I PACE
		AncB4
Global	94	100	117	127	165	181	183	237	260	271
AncB4	37	43	60	70	108	124	126	179	202	213
AncB4 AA	A	P	A	P	R	T	Y	Y	E	W
I1-1							C
I1-2	E				H		C
I2-1		L	T	S			D		FS, 8 AAs less
I2-2							H
I3-1						T (co)		S		*amber
	AncB5
Global	3	111	133	160	163	171	172	183	187	188	229	258	260	261	271
AncB5	3	54	76	103	106	114	115	126	130	131	171	200	202	203	213
AncB5 AA	A	H	A	F	R	M	S	Y	A	E	N	L	G	P	W
I4-1				L				S			T			FS, 8 AA less
I4-2	T							S						FS, 8 AA less
I5-1					H		P			G					*amber
I5-2									T				FS, 8 AA less
I6-1		N				I	P			G					*amber
I6-2		Y	V							G		I

## Sheet: J PACE
	AncM6
Global	23	28	38	41	43	168	171	181	182	185	188	189	202	258
AncM6	23	28	38	41	43	117	120	130	131	134	137	138	151	207
AncM6 AA	L	A	E	N	T	F	M	E	D	T	N	V	G	F
J1-1	L (co)										D		C
J1-2	L (co)												C
J1-3	L (co)										D		C
J2-1						S								V
J2-2						S								V
J2-3			K			S
J3-1		V				S								S
J3-2							V	E (co)	V			G		S
J3-3				H	P	S				I				S
J4-1						S								V
J4-2						S								V
J4-3						S								V

## Sheet: L PACE
	hsMCL-1
Global	34	38	56	57	79	166	167	174	189	195	200	202	256	258	263
hsMCL-1 seq	34	38	56	57	79	115	116	123	138	144	149	151	205	207	212
hsMCL-1 AA	E	E	A	E	A	T	A	K	V	S	N	G	V	F	D
L1-1									G		S			V
L1-2			T			P			G		S			V
L1-4		K			P			E	G		S			V
L2-1				E(co)	P			E	G		T
L2-2		G						E	G		T
L2-3									G		T
L3-1									G			N			A
L3-2	E(co)						T	E	G
L3-3							T		G			S
L4-1							T		G
L4-2									G	N		C
L4-3							T		G				FS, 9 AA less

## Sheet: M PACE
	AncB1
Global	65	71	84	101	104	134	160	168	175	185	195	200	205	213	220	252	254
AncB1	8	14	27	44	47	77	103	111	118	128	138	142	147	155	162	194	196
AncB1 AA	E	V	Y	A	I	P	L	F	L	T	R	N	V	A	E	W	G
M1-1													A	S
M1-2									V
M1-3									V
M2-2			D				I					S			G	FS, 19 AA less
M2-3					FS to truncate at B1(63)
M2-4		A	D									S
M3-1	D							Y				N (co)					FS, 2 AA less
M3-2										I						FS, 19 AA less
M3-3				FS to truncate at B1(65)
M4-1												Y
M4-2											L	Y
M4-3						FS to shorten at B1(92)

## Sheet: P PACE, unbiased colony picking
	hsBCL-2
Global	90	169	243	247	262	269	271
hsBCL-2 seq	33	112	185	189	204	211	213
hsBCL-2 AA	D	A	H	Q	S	F	W
P1-5					FS, 8 AA less
P1-6			P	L	FS, 8 AA less
P1-7							*amber
P2-5		S				I
P2-6	-
P2-7	D (co)
P4-6
P4-7	-
P4-8					del, 1 AA less

[truncated: 4 more sheets: P PACE, NOXA active plaques, Q PACE, W PACE, X PACE]
