# Supplementary material for: Contingency and chance erase necessity in the experimental evolution of ancestral proteins
Source: eLife. 2021 Jun 1;10:e67336. doi: 10.7554/eLife.67336 (PMC8282340; doi:10.7554/eLife.67336)
Supplement: Supplementary file 4. — PACE experiments are listed in the tab ‘Library-info’, which contains the name, purpose of the experiment, and HTS experiment numbers. The tab ‘Primers for HTS’ lists all the primer sequences used for HTS library constructions. The tab ‘MiSeq reads number’ include the read number of each library in this MiSeq run and the library sample information. The library samples are labeled as X*-end or X*-$$. ‘X’ indicates the specific PACE experiment, ‘*’ the experimental replicate, ‘end’ means samples were collected after 96 hr when the experiment finished, and ‘$$’ indicates the time point after removing chemostat A (e.g. ‘B2-24’ is a sample from replicate 2 of evolution B and collected 24 hr after removing chemostat A, which is 72 hr from the start of PACE). The tab ‘genotype’ includes the aligned protein sequences with corresponding residue numbers. The ‘Frequency’ tab contains the non-wild-type amino acid frequency of each sample for each site. [file elife-67336-supp4.xlsx]

## Sheet: Library-info
	Library code	Purpose	Lagoons	HTS samples	HST expm. No.
	B	hsBCL-2 for NOXA	All hsBCL-2 in 1~4	lagoon1~4, X5 timepoints each	[1, 2, 3, 4, 5, 6, 7, 8, 9, 10, 11, 12, 13, 14, 15, 16, 17, 18, 19, 20]
	C	AncB4 for NOXA	All AncB4 in 1~4	lagoon1~4, final sample only	[25, 26, 27, 28]
	D	AncB5 for NOXA	All AncB5 in 1~3	lagoon1~4, final sample only	[29, 30, 31]
	J	AncM6 against NOXA	All AncM6 in 1~4	lagoon1~4, final sample only	[33, 34, 35, 36]
	K	AncMB1_M and AncMB1_B against NOXA	AncMB1_M in 1,2 and AncMB1_B in 3,4	lagoon1~4, final sample only	[37, 38], [39, 40]
	L	hsMCL-1 against NOXA	All hsMCL-1 in 1~4	lagoon1~4, X5 timepoints each	[41, 42, 43, 44, 45, 46, 47, 48, 49, 50, 51, 52, 53, 54, 55, 56, 57, 58, 59, 60]
	M	AncB1 against NOXA	All AncB1 in 1~4	lagoon1~4, final sample only	[61, 62, 63, 64]
	P	hsBCL-2 for BID	All hsBCL-2 in 1-4	lagoon1~4, final sample only	[ 21, 22, 23, 24]
	Q	evolved hsBCL-2 variants against NOXA	variant B1-3 in 1, B2-1 in 2, B3-1 in 3, B4-2 in 4	lagoon1,2, final sample only	[65, 66]
	W	hsMCL-1 and hsBCL-2 variants on +NOXA/-BID	hsMCL-1 in 1-2, 32-50 in 3, 32-52 in 4	lagoon1,2, final sample only	[67, 68]
	X	hsBCL-2 control on +BID/-NOXA	All hsBCL-2 in 1-4	lagoon1~4, final sample only	[69, 70, 71, 72]

## Sheet: Primers for HTS
Primer set 1	For amplifying BCL-2 family protein library fragments and add barcode and adapter sequences
PACE	library subject	Fragment	Forward primer name	sequence match template	entire primer sequence (including 6~9 random barcode and adapter sequences)	Reverse primer name	sequence match template	entire primer sequence (including 6~9 random barcode and adapter sequences)
B	BCL-2	fg1	lib-F1-N6 *	GGTGGATCTGGTggcAGC	GTGACTGGAGTTCAGACGTGtgctcttccgatctNNNNNNGGTGGATCTGGTggcAGC	libB-R1-N6	TTAAGGCAGGTCCAGCTGC	ACACTCTTTCCCTACACGACgctcttccgatctNNNNNNTTAAGGCAGGTCCAGCTGC
			lib-F1-N7		GTGACTGGAGTTCAGACGTGtgctcttccgatctNNNNNNNGGTGGATCTGGTggcAGC	libB-R1-N7		ACACTCTTTCCCTACACGACgctcttccgatctNNNNNNNTTAAGGCAGGTCCAGCTGC
			lib-F1-N8		GTGACTGGAGTTCAGACGTGtgctcttccgatctNNNNNNNNGGTGGATCTGGTggcAGC	libB-R1-N8		ACACTCTTTCCCTACACGACgctcttccgatctNNNNNNNNTTAAGGCAGGTCCAGCTGC
			lib-F1-N9		GTGACTGGAGTTCAGACGTGtgctcttccgatctNNNNNNNNNGGTGGATCTGGTggcAGC	libB-R1-N9		ACACTCTTTCCCTACACGACgctcttccgatctNNNNNNNNNTTAAGGCAGGTCCAGCTGC
		fg2	libB-F2-N6	ACGCACGAGTCCTCTTCAG	GTGACTGGAGTTCAGACGTGtgctcttccgatctNNNNNNACGCACGAGTCCTCTTCAG	libB-R2-N6	ACATGACCCCACCGAACTC	ACACTCTTTCCCTACACGACgctcttccgatctNNNNNNACATGACCCCACCGAACTC
			libB-F2-N7		GTGACTGGAGTTCAGACGTGtgctcttccgatctNNNNNNNACGCACGAGTCCTCTTCAG	libB-R2-N7		ACACTCTTTCCCTACACGACgctcttccgatctNNNNNNNACATGACCCCACCGAACTC
			libB-F2-N8		GTGACTGGAGTTCAGACGTGtgctcttccgatctNNNNNNNNACGCACGAGTCCTCTTCAG	libB-R2-N8		ACACTCTTTCCCTACACGACgctcttccgatctNNNNNNNNACATGACCCCACCGAACTC
			libB-F2-N9		GTGACTGGAGTTCAGACGTGtgctcttccgatctNNNNNNNNNACGCACGAGTCCTCTTCAG	libB-R2-N9		ACACTCTTTCCCTACACGACgctcttccgatctNNNNNNNNNACATGACCCCACCGAACTC
		fg3	libB-F3-N6	TCAGGGACGGGGTGAACTG	GTGACTGGAGTTCAGACGTGtgctcttccgatctNNNNNNTCAGGGACGGGGTGAACTG	lib-R3-N6	ccgattgagggagcatgttg	ACACTCTTTCCCTACACGACgctcttccgatctNNNNNNccgattgagggagcatgttg
			libB-F3-N7		GTGACTGGAGTTCAGACGTGtgctcttccgatctNNNNNNNTCAGGGACGGGGTGAACTG	lib-R3-N7		ACACTCTTTCCCTACACGACgctcttccgatctNNNNNNNccgattgagggagcatgttg
			libB-F3-N8		GTGACTGGAGTTCAGACGTGtgctcttccgatctNNNNNNNNTCAGGGACGGGGTGAACTG	lib-R3-N8		ACACTCTTTCCCTACACGACgctcttccgatctNNNNNNNNccgattgagggagcatgttg
			libB-F3-N9		GTGACTGGAGTTCAGACGTGtgctcttccgatctNNNNNNNNNTCAGGGACGGGGTGAACTG	lib-R3-N9		ACACTCTTTCCCTACACGACgctcttccgatctNNNNNNNNNccgattgagggagcatgttg
C	AncB4	fg1	lib-F1-N6			libC-R1-N6	GAAAGGGCTGGACCTGCTG	ACACTCTTTCCCTACACGACgctcttccgatctNNNNNNGAAAGGGCTGGACCTGCTG
			lib-F1-N7			libC-R1-N7		ACACTCTTTCCCTACACGACgctcttccgatctNNNNNNNGAAAGGGCTGGACCTGCTG
			lib-F1-N8			libC-R1-N8		ACACTCTTTCCCTACACGACgctcttccgatctNNNNNNNNGAAAGGGCTGGACCTGCTG
			lib-F1-N9			libC-R1-N9		ACACTCTTTCCCTACACGACgctcttccgatctNNNNNNNNNGAAAGGGCTGGACCTGCTG
		fg2	libC-F2-N6	GTGGCACGTACATCTCCGT	GTGACTGGAGTTCAGACGTGtgctcttccgatctNNNNNNGTGGCACGTACATCTCCGT	libC-R2-N6	GCCAATGCACCGCCGAAC	ACACTCTTTCCCTACACGACgctcttccgatctNNNNNNGCCAATGCACCGCCGAAC
			libC-F2-N7		GTGACTGGAGTTCAGACGTGtgctcttccgatctNNNNNNNGTGGCACGTACATCTCCGT	libC-R2-N7		ACACTCTTTCCCTACACGACgctcttccgatctNNNNNNNGCCAATGCACCGCCGAAC
			libC-F2-N8		GTGACTGGAGTTCAGACGTGtgctcttccgatctNNNNNNNNGTGGCACGTACATCTCCGT	libC-R2-N8		ACACTCTTTCCCTACACGACgctcttccgatctNNNNNNNNGCCAATGCACCGCCGAAC
			libC-F2-N9		GTGACTGGAGTTCAGACGTGtgctcttccgatctNNNNNNNNNGTGGCACGTACATCTCCGT	libC-R2-N9		ACACTCTTTCCCTACACGACgctcttccgatctNNNNNNNNNGCCAATGCACCGCCGAAC
		fg3	libC-F3-N6	TGTTAACTGGGGGCGCATC	GTGACTGGAGTTCAGACGTGtgctcttccgatctNNNNNNTGTTAACTGGGGGCGCATC	lib-R3-N6 **
			libC-F3-N7		GTGACTGGAGTTCAGACGTGtgctcttccgatctNNNNNNNTGTTAACTGGGGGCGCATC	lib-R3-N7
			libC-F3-N8		GTGACTGGAGTTCAGACGTGtgctcttccgatctNNNNNNNNTGTTAACTGGGGGCGCATC	lib-R3-N8
			libC-F3-N9		GTGACTGGAGTTCAGACGTGtgctcttccgatctNNNNNNNNNTGTTAACTGGGGGCGCATC	lib-R3-N9
D	AncB5	fg1	lib-F1-N6			libD-R1-N6	GAGACAAGGCAGGTCCAGC	ACACTCTTTCCCTACACGACgctcttccgatctNNNNNNGAGACAAGGCAGGTCCAGC
			lib-F1-N7			libD-R1-N7		ACACTCTTTCCCTACACGACgctcttccgatctNNNNNNNGAGACAAGGCAGGTCCAGC
			lib-F1-N8			libD-R1-N8		ACACTCTTTCCCTACACGACgctcttccgatctNNNNNNNNGAGACAAGGCAGGTCCAGC
			lib-F1-N9			libD-R1-N9		ACACTCTTTCCCTACACGACgctcttccgatctNNNNNNNNNGAGACAAGGCAGGTCCAGC
		fg2	libD-F2-N6	GCACGTACGTCGCCATTAC	GTGACTGGAGTTCAGACGTGtgctcttccgatctNNNNNNGCACGTACGTCGCCATTAC	libD-R2-N6	ACACAAAGCGCCGCCAAAG	ACACTCTTTCCCTACACGACgctcttccgatctNNNNNNACACAAAGCGCCGCCAAAG
			libD-F2-N7		GTGACTGGAGTTCAGACGTGtgctcttccgatctNNNNNNNGCACGTACGTCGCCATTAC	libD-R2-N7		ACACTCTTTCCCTACACGACgctcttccgatctNNNNNNNACACAAAGCGCCGCCAAAG
			libD-F2-N8		GTGACTGGAGTTCAGACGTGtgctcttccgatctNNNNNNNNGCACGTACGTCGCCATTAC	libD-R2-N8		ACACTCTTTCCCTACACGACgctcttccgatctNNNNNNNNACACAAAGCGCCGCCAAAG
			libD-F2-N9		GTGACTGGAGTTCAGACGTGtgctcttccgatctNNNNNNNNNGCACGTACGTCGCCATTAC	libD-R2-N9		ACACTCTTTCCCTACACGACgctcttccgatctNNNNNNNNNACACAAAGCGCCGCCAAAG
		fg3	libD-F3-N6	CGGTGTTAATTGGGGGCGT	GTGACTGGAGTTCAGACGTGtgctcttccgatctNNNNNNCGGTGTTAATTGGGGGCGT	lib-R3-N6
			libD-F3-N7		GTGACTGGAGTTCAGACGTGtgctcttccgatctNNNNNNNCGGTGTTAATTGGGGGCGT	lib-R3-N7
			libD-F3-N8		GTGACTGGAGTTCAGACGTGtgctcttccgatctNNNNNNNNCGGTGTTAATTGGGGGCGT	lib-R3-N8
			libD-F3-N9		GTGACTGGAGTTCAGACGTGtgctcttccgatctNNNNNNNNNCGGTGTTAATTGGGGGCGT	lib-R3-N9
J	AncM6	fg1	lib-F1-N6			libJ-R1-N6	GGCACCCCCTAAGTGATAGC	ACACTCTTTCCCTACACGACgctcttccgatctNNNNNNGGCACCCCCTAAGTGATAGC
			lib-F1-N7			libJ-R1-N7		ACACTCTTTCCCTACACGACgctcttccgatctNNNNNNNGGCACCCCCTAAGTGATAGC
			lib-F1-N8			libJ-R1-N8		ACACTCTTTCCCTACACGACgctcttccgatctNNNNNNNNGGCACCCCCTAAGTGATAGC
			lib-F1-N9			libJ-R1-N9		ACACTCTTTCCCTACACGACgctcttccgatctNNNNNNNNNGGCACCCCCTAAGTGATAGC
		fg2	libJ-F2-N6	CATGAGTTGGCGCGTGAC	GTGACTGGAGTTCAGACGTGtgctcttccgatctNNNNNNCATGAGTTGGCGCGTGAC	libJ-R2-N6	GGATACGATGCGGCCCCA	ACACTCTTTCCCTACACGACgctcttccgatctNNNNNNGGATACGATGCGGCCCCA
			libJ-F2-N7		GTGACTGGAGTTCAGACGTGtgctcttccgatctNNNNNNNCATGAGTTGGCGCGTGAC	libJ-R2-N7		ACACTCTTTCCCTACACGACgctcttccgatctNNNNNNNGGATACGATGCGGCCCCA
			libJ-F2-N8		GTGACTGGAGTTCAGACGTGtgctcttccgatctNNNNNNNNCATGAGTTGGCGCGTGAC	libJ-R2-N8		ACACTCTTTCCCTACACGACgctcttccgatctNNNNNNNNGGATACGATGCGGCCCCA
			libJ-F2-N9		GTGACTGGAGTTCAGACGTGtgctcttccgatctNNNNNNNNNCATGAGTTGGCGCGTGAC	libJ-R2-N9		ACACTCTTTCCCTACACGACgctcttccgatctNNNNNNNNNGGATACGATGCGGCCCCA
		fg3	libJ-F3-N6	GGCCAACGAAATGTTCTCGG	GTGACTGGAGTTCAGACGTGtgctcttccgatctNNNNNNGGCCAACGAAATGTTCTCGG	lib-R3-N6
			libJ-F3-N7		GTGACTGGAGTTCAGACGTGtgctcttccgatctNNNNNNNGGCCAACGAAATGTTCTCGG	lib-R3-N7
			libJ-F3-N8		GTGACTGGAGTTCAGACGTGtgctcttccgatctNNNNNNNNGGCCAACGAAATGTTCTCGG	lib-R3-N8
			libJ-F3-N9		GTGACTGGAGTTCAGACGTGtgctcttccgatctNNNNNNNNNGGCCAACGAAATGTTCTCGG	lib-R3-N9
K12	AncMB1_M	fg1	lib-F1-N6			libK12-R1-N6	GTATCTTTCGCACCACGCAG	ACACTCTTTCCCTACACGACgctcttccgatctNNNNNNGTATCTTTCGCACCACGCAG
			lib-F1-N7			libK12-R1-N7		ACACTCTTTCCCTACACGACgctcttccgatctNNNNNNNGTATCTTTCGCACCACGCAG
			lib-F1-N8			libK12-R1-N8		ACACTCTTTCCCTACACGACgctcttccgatctNNNNNNNNGTATCTTTCGCACCACGCAG
			lib-F1-N9			libK12-R1-N9		ACACTCTTTCCCTACACGACgctcttccgatctNNNNNNNNNGTATCTTTCGCACCACGCAG
		fg2	libK12-F2-N6	CGAACAGGCAAAGAATTTGGTGA	GTGACTGGAGTTCAGACGTGtgctcttccgatctNNNNNNCGAACAGGCAAAGAATTTGGTGA	libK12-R2-N6	GAGCGACAATACGTCCCCA	ACACTCTTTCCCTACACGACgctcttccgatctNNNNNNGAGCGACAATACGTCCCCA
			libK12-F2-N7		GTGACTGGAGTTCAGACGTGtgctcttccgatctNNNNNNNCGAACAGGCAAAGAATTTGGTGA	libK12-R2-N7		ACACTCTTTCCCTACACGACgctcttccgatctNNNNNNNGAGCGACAATACGTCCCCA
			libK12-F2-N8		GTGACTGGAGTTCAGACGTGtgctcttccgatctNNNNNNNNCGAACAGGCAAAGAATTTGGTGA	libK12-R2-N8		ACACTCTTTCCCTACACGACgctcttccgatctNNNNNNNNGAGCGACAATACGTCCCCA
			libK12-F2-N9		GTGACTGGAGTTCAGACGTGtgctcttccgatctNNNNNNNNNCGAACAGGCAAAGAATTTGGTGA	libK12-R2-N9		ACACTCTTTCCCTACACGACgctcttccgatctNNNNNNNNNGAGCGACAATACGTCCCCA
		fg3	libK12-F3-N6	AACTGTTTCGTGACGGCGT	GTGACTGGAGTTCAGACGTGtgctcttccgatctNNNNNNAACTGTTTCGTGACGGCGT	lib-R3-N6
			libK12-F3-N7		GTGACTGGAGTTCAGACGTGtgctcttccgatctNNNNNNNAACTGTTTCGTGACGGCGT	lib-R3-N7
			libK12-F3-N8		GTGACTGGAGTTCAGACGTGtgctcttccgatctNNNNNNNNAACTGTTTCGTGACGGCGT	lib-R3-N8
			libK12-F3-N9		GTGACTGGAGTTCAGACGTGtgctcttccgatctNNNNNNNNNAACTGTTTCGTGACGGCGT	lib-R3-N9
K34	AncMB1_B	fg1	lib-F1-N6			libK34-R1-N6	GTGATAATGCTGGGCCAGCT	ACACTCTTTCCCTACACGACgctcttccgatctNNNNNNGTGATAATGCTGGGCCAGCT
			lib-F1-N7			libK34-R1-N7		ACACTCTTTCCCTACACGACgctcttccgatctNNNNNNNGTGATAATGCTGGGCCAGCT
			lib-F1-N8			libK34-R1-N8		ACACTCTTTCCCTACACGACgctcttccgatctNNNNNNNNGTGATAATGCTGGGCCAGCT
			lib-F1-N9			libK34-R1-N9		ACACTCTTTCCCTACACGACgctcttccgatctNNNNNNNNNGTGATAATGCTGGGCCAGCT
		fg2	libK34-F2-N6	GCACGTACCTCTCCGCTTC	GTGACTGGAGTTCAGACGTGtgctcttccgatctNNNNNNGCACGTACCTCTCCGCTTC	libK34-R2-N6	AGGGCCCCACCGAAAGCA	ACACTCTTTCCCTACACGACgctcttccgatctNNNNNNAGGGCCCCACCGAAAGCA
			libK34-F2-N7		GTGACTGGAGTTCAGACGTGtgctcttccgatctNNNNNNNGCACGTACCTCTCCGCTTC	libK34-R2-N7		ACACTCTTTCCCTACACGACgctcttccgatctNNNNNNNAGGGCCCCACCGAAAGCA
			libK34-F2-N8		GTGACTGGAGTTCAGACGTGtgctcttccgatctNNNNNNNNGCACGTACCTCTCCGCTTC	libK34-R2-N8		ACACTCTTTCCCTACACGACgctcttccgatctNNNNNNNNAGGGCCCCACCGAAAGCA
			libK34-F2-N9		GTGACTGGAGTTCAGACGTGtgctcttccgatctNNNNNNNNNGCACGTACCTCTCCGCTTC	libK34-R2-N9		ACACTCTTTCCCTACACGACgctcttccgatctNNNNNNNNNAGGGCCCCACCGAAAGCA
		fg3	libK34-F3-N6	CCGCGACGGTATCAATTGG	GTGACTGGAGTTCAGACGTGtgctcttccgatctNNNNNNCCGCGACGGTATCAATTGG	lib-R3-N6
			libK34-F3-N7		GTGACTGGAGTTCAGACGTGtgctcttccgatctNNNNNNNCCGCGACGGTATCAATTGG	lib-R3-N7
			libK34-F3-N8		GTGACTGGAGTTCAGACGTGtgctcttccgatctNNNNNNNNCCGCGACGGTATCAATTGG	lib-R3-N8
			libK34-F3-N9		GTGACTGGAGTTCAGACGTGtgctcttccgatctNNNNNNNNNCCGCGACGGTATCAATTGG	lib-R3-N9
L	MCL-1	fg1	lib-F1-N6			libL-R1-N6	GCCTGCTCCCGAAGGTAC	ACACTCTTTCCCTACACGACgctcttccgatctNNNNNNGCCTGCTCCCGAAGGTAC
			lib-F1-N7			libL-R1-N7		ACACTCTTTCCCTACACGACgctcttccgatctNNNNNNNGCCTGCTCCCGAAGGTAC
			lib-F1-N8			libL-R1-N8		ACACTCTTTCCCTACACGACgctcttccgatctNNNNNNNNGCCTGCTCCCGAAGGTAC
			lib-F1-N9			libL-R1-N9		ACACTCTTTCCCTACACGACgctcttccgatctNNNNNNNNNGCCTGCTCCCGAAGGTAC
		fg2	libL-F2-N6	TACCGGCAGTCGCTGGAG	GTGACTGGAGTTCAGACGTGtgctcttccgatctNNNNNNTACCGGCAGTCGCTGGAG	libL-R2-N6	GAGTCACAATCCTGCCCCA	ACACTCTTTCCCTACACGACgctcttccgatctNNNNNNGAGTCACAATCCTGCCCCA
			libL-F2-N7		GTGACTGGAGTTCAGACGTGtgctcttccgatctNNNNNNNTACCGGCAGTCGCTGGAG	libL-R2-N7		ACACTCTTTCCCTACACGACgctcttccgatctNNNNNNNGAGTCACAATCCTGCCCCA
			libL-F2-N8		GTGACTGGAGTTCAGACGTGtgctcttccgatctNNNNNNNNTACCGGCAGTCGCTGGAG	libL-R2-N8		ACACTCTTTCCCTACACGACgctcttccgatctNNNNNNNNGAGTCACAATCCTGCCCCA
			libL-F2-N9		GTGACTGGAGTTCAGACGTGtgctcttccgatctNNNNNNNNNTACCGGCAGTCGCTGGAG	libL-R2-N9		ACACTCTTTCCCTACACGACgctcttccgatctNNNNNNNNNGAGTCACAATCCTGCCCCA
		fg3	libL-F3-N6	ATGTTTTCAGCGACGGCGT	GTGACTGGAGTTCAGACGTGtgctcttccgatctNNNNNNATGTTTTCAGCGACGGCGT	lib-R3-N6
			libL-F3-N7		GTGACTGGAGTTCAGACGTGtgctcttccgatctNNNNNNNATGTTTTCAGCGACGGCGT	lib-R3-N7
			libL-F3-N8		GTGACTGGAGTTCAGACGTGtgctcttccgatctNNNNNNNNATGTTTTCAGCGACGGCGT	lib-R3-N8
			libL-F3-N9		GTGACTGGAGTTCAGACGTGtgctcttccgatctNNNNNNNNNATGTTTTCAGCGACGGCGT	lib-R3-N9
M	AncB1	fg1	lib-F1-N6			libM-R1-N6	GGGAAAGTGCCGGTCCTG	ACACTCTTTCCCTACACGACgctcttccgatctNNNNNNGGGAAAGTGCCGGTCCTG
			lib-F1-N7			libM-R1-N7		ACACTCTTTCCCTACACGACgctcttccgatctNNNNNNNGGGAAAGTGCCGGTCCTG
			lib-F1-N8			libM-R1-N8		ACACTCTTTCCCTACACGACgctcttccgatctNNNNNNNNGGGAAAGTGCCGGTCCTG
			lib-F1-N9			libM-R1-N9		ACACTCTTTCCCTACACGACgctcttccgatctNNNNNNNNNGGGAAAGTGCCGGTCCTG
		fg2	libM-F2-N6	CTGCAAACACCCGCAGCA	GTGACTGGAGTTCAGACGTGtgctcttccgatctNNNNNNCTGCAAACACCCGCAGCA	libM-R2-N6	ACTGCAAGAGCTCCACCGA	ACACTCTTTCCCTACACGACgctcttccgatctNNNNNNACTGCAAGAGCTCCACCGA
			libM-F2-N7		GTGACTGGAGTTCAGACGTGtgctcttccgatctNNNNNNNCTGCAAACACCCGCAGCA	libM-R2-N7		ACACTCTTTCCCTACACGACgctcttccgatctNNNNNNNACTGCAAGAGCTCCACCGA
			libM-F2-N8		GTGACTGGAGTTCAGACGTGtgctcttccgatctNNNNNNNNCTGCAAACACCCGCAGCA	libM-R2-N8		ACACTCTTTCCCTACACGACgctcttccgatctNNNNNNNNACTGCAAGAGCTCCACCGA
			libM-F2-N9		GTGACTGGAGTTCAGACGTGtgctcttccgatctNNNNNNNNNCTGCAAACACCCGCAGCA	libM-R2-N9		ACACTCTTTCCCTACACGACgctcttccgatctNNNNNNNNNACTGCAAGAGCTCCACCGA
		fg3	libM-F3-N6	AATTGGGGGCGTATCGTCG	GTGACTGGAGTTCAGACGTGtgctcttccgatctNNNNNNAATTGGGGGCGTATCGTCG	lib-R3-N6
			libM-F3-N7		GTGACTGGAGTTCAGACGTGtgctcttccgatctNNNNNNNAATTGGGGGCGTATCGTCG	lib-R3-N7
			libM-F3-N8		GTGACTGGAGTTCAGACGTGtgctcttccgatctNNNNNNNNAATTGGGGGCGTATCGTCG	lib-R3-N8
			libM-F3-N9		GTGACTGGAGTTCAGACGTGtgctcttccgatctNNNNNNNNNAATTGGGGGCGTATCGTCG	lib-R3-N9
	* This group of forward primers are used for all library's fragment 1 amplification.
	** This group of reverse primers are used for all library's fragment 3 amplification.
Primer set 2	For Miseq sequencing library preparation and add sequencing indexes
				Round 2 PCR primer sequences
				TruSeq_D501	AATGATACGGCGACCACCGAGATCTACACtatagcctACACTCTTTCCCTACACGAC
				TruSeq_D502	AATGATACGGCGACCACCGAGATCTACACatagaggcACACTCTTTCCCTACACGAC
				TruSeq_D503	AATGATACGGCGACCACCGAGATCTACACcctatcctACACTCTTTCCCTACACGAC
				TruSeq_D504	AATGATACGGCGACCACCGAGATCTACACggctctgaACACTCTTTCCCTACACGAC
				TruSeq_D505	AATGATACGGCGACCACCGAGATCTACACaggcgaagACACTCTTTCCCTACACGAC
				TruSeq_D506	AATGATACGGCGACCACCGAGATCTACACtaatcttaACACTCTTTCCCTACACGAC
				TruSeq_D507	AATGATACGGCGACCACCGAGATCTACACcaggacgtACACTCTTTCCCTACACGAC
				TruSeq_D508	AATGATACGGCGACCACCGAGATCTACACgtactgacACACTCTTTCCCTACACGAC
				TruSeq_D701	CAAGCAGAAGACGGCATACGAGATcgagtaatGTGACTGGAGTTCAGACGTG
				TruSeq_D702	CAAGCAGAAGACGGCATACGAGATtctccggaGTGACTGGAGTTCAGACGTG
				TruSeq_D703	CAAGCAGAAGACGGCATACGAGATaatgagcgGTGACTGGAGTTCAGACGTG
				TruSeq_D704	CAAGCAGAAGACGGCATACGAGATggaatctcGTGACTGGAGTTCAGACGTG
				TruSeq_D705	CAAGCAGAAGACGGCATACGAGATttctgaatGTGACTGGAGTTCAGACGTG
				TruSeq_D706	CAAGCAGAAGACGGCATACGAGATacgaattcGTGACTGGAGTTCAGACGTG
				TruSeq_D707	CAAGCAGAAGACGGCATACGAGATagcttcagGTGACTGGAGTTCAGACGTG
				TruSeq_D708	CAAGCAGAAGACGGCATACGAGATgcgcattaGTGACTGGAGTTCAGACGTG
				TruSeq_D709	CAAGCAGAAGACGGCATACGAGATcatagccgGTGACTGGAGTTCAGACGTG
	Round 2 library PCR layout with correspounding sequencing indexes
		D701	D702	D703	D704	D705	D706	D707	D708	D709
	D501	B1 -00	B1 -24	B1 -48	C1 -48	J1 -48	L1 -00	L1 -24	L1 -48	Q1 -end
	D502	B2 -00	B2 -24	B2 -48	C2 -48	J2 -48	L2 -00	L2 -24	L2 -48	Q2 -end
	D503	B3 -00	B3 -24	B3 -48	C3 -48	J3 -48	L3 -00	L3 -24	L3 -48	W1 -end
	D504	B4 -00	B4 -24	B4 -48	C4 -48	J4 -48	L4 -00	L4 -24	L4 -48	W2 -end
	D505	B1 -12	B1 -36	P1 -48	D1 -48	K1 -48	L1 -12	L1 -36	M1 -48	X1 -end
	D506	B2 -12	B2 -36	P2 -48	D2 -48	K2 -48	L2 -12	L2 -36	M2 -48	X2 -end
	D507	B3 -12	B3 -36	P3 -48	D3 -48	K3 -48	L3 -12	L3 -36	M3 -48	X3 -end
	D508	B4 -12	B4 -36	P4 -48	D4 -48	K4 -48	L4 -12	L4 -36	M4 -48	X4 -end

## Sheet: MiSeq reads number
Miseq experiment code
	expm. No.	PACE code	expm. No.	PACE code	expm. No.	PACE code	expm. No.	PACE code	expm. No.	PACE code	expm. No.	PACE code	expm. No.	PACE code	expm. No.	PACE code	expm. No.	PACE code
	1	B1 -00	9	B1 -24	17	B1 -48	25	C1 -48	33	J1 -48	41	L1 -00	49	L1 -24	57	L1 -48	65	Q1 -end
	2	B2 -00	10	B2 -24	18	B2 -48	26	C2 -48	34	J2 -48	42	L2 -00	50	L2 -24	58	L2 -48	66	Q2 -end
	3	B3 -00	11	B3 -24	19	B3 -48	27	C3 -48	35	J3 -48	43	L3 -00	51	L3 -24	59	L3 -48	67	W1 -end
	4	B4 -00	12	B4 -24	20	B4 -48	28	C4 -48	36	J4 -48	44	L4 -00	52	L4 -24	60	L4 -48	68	W2 -end
	5	B1 -12	13	B1 -36	21	P1 -48	29	D1 -48	37	K1 -48	45	L1 -12	53	L1 -36	61	M1 -48	69	X1 -end
	6	B2 -12	14	B2 -36	22	P2 -48	30	D2 -48	38	K2 -48	46	L2 -12	54	L2 -36	62	M2 -48	70	X2 -end
	7	B3 -12	15	B3 -36	23	P3 -48	31	D3 -48	39	K3 -48	47	L3 -12	55	L3 -36	63	M3 -48	71	X3 -end
	8	B4 -12	16	B4 -36	24	P4 -48			40	K4 -48	48	L4 -12	56	L4 -36	64	M4 -48	72	X4 -end
MiSeq reads number
	Total reads	PF reads	% Read identified(PF)	CV	Min	Max
	22258661	17109151	76.0724	0.2285	0.3305	1.7369
	Index no.	Sample ID	Project	Index 1(i7)	Index 2(i5)	Reads Identified(PF)
	1	1	NA	ATTACTCG	TATAGCCT	0.7057
	2	2	NA	ATTACTCG	ATAGAGGC	1.0355
	3	3	NA	ATTACTCG	CCTATCCT	1.088
	4	4	NA	ATTACTCG	GGCTCTGA	0.9712
	5	5	NA	ATTACTCG	AGGCGAAG	0.3866
	6	6	NA	ATTACTCG	TAATCTTA	0.9528
	7	7	NA	ATTACTCG	CAGGACGT	0.8141
	8	8	NA	ATTACTCG	GTACTGAC	0.5652
	9	9	NA	TCCGGAGA	TATAGCCT	0.8246
	10	10	NA	TCCGGAGA	ATAGAGGC	1.3145
	11	11	NA	TCCGGAGA	CCTATCCT	0.8945
	12	12	NA	TCCGGAGA	GGCTCTGA	0.8606
	13	13	NA	TCCGGAGA	AGGCGAAG	0.9028
	14	14	NA	TCCGGAGA	TAATCTTA	0.8594
	15	15	NA	TCCGGAGA	CAGGACGT	0.9242
	16	16	NA	TCCGGAGA	GTACTGAC	0.8294
	17	17	NA	CGCTCATT	TATAGCCT	0.8764
	18	18	NA	CGCTCATT	ATAGAGGC	1.4522
	19	19	NA	CGCTCATT	CCTATCCT	1.242
	20	20	NA	CGCTCATT	GGCTCTGA	1.0351
	21	21	NA	CGCTCATT	AGGCGAAG	1.0974
	22	22	NA	CGCTCATT	TAATCTTA	1.3504
	23	23	NA	CGCTCATT	CAGGACGT	1.1818
	24	24	NA	CGCTCATT	GTACTGAC	1.0237
	25	25	NA	GAGATTCC	TATAGCCT	0.7902
	26	26	NA	GAGATTCC	ATAGAGGC	1.1187
	27	27	NA	GAGATTCC	CCTATCCT	1.0079
	28	28	NA	GAGATTCC	GGCTCTGA	1.0207
	29	29	NA	GAGATTCC	AGGCGAAG	1.2324
	30	30	NA	GAGATTCC	TAATCTTA	1.1717
	31	31	NA	GAGATTCC	CAGGACGT	1.28
	33	33	NA	ATTCAGAA	TATAGCCT	0.9955
	34	34	NA	ATTCAGAA	ATAGAGGC	1.3143
	35	35	NA	ATTCAGAA	CCTATCCT	1.1569
	36	36	NA	ATTCAGAA	GGCTCTGA	0.8586
	37	37	NA	ATTCAGAA	AGGCGAAG	0.8085
	38	38	NA	ATTCAGAA	TAATCTTA	0.8223
	39	39	NA	ATTCAGAA	CAGGACGT	0.9846
	40	40	NA	ATTCAGAA	GTACTGAC	0.8034
	41	41	NA	GAATTCGT	TATAGCCT	1.4697
	42	42	NA	GAATTCGT	ATAGAGGC	1.1668
	43	43	NA	GAATTCGT	CCTATCCT	0.9825
	44	44	NA	GAATTCGT	GGCTCTGA	0.8784
	45	45	NA	GAATTCGT	AGGCGAAG	1.3477
	46	46	NA	GAATTCGT	TAATCTTA	1.0926
	47	47	NA	GAATTCGT	CAGGACGT	0.8401
	48	48	NA	GAATTCGT	GTACTGAC	0.3305
	49	49	NA	CTGAAGCT	TATAGCCT	1.2181
	50	50	NA	CTGAAGCT	ATAGAGGC	1.4043
	51	51	NA	CTGAAGCT	CCTATCCT	1.0413
	52	52	NA	CTGAAGCT	GGCTCTGA	0.8812
	53	53	NA	CTGAAGCT	AGGCGAAG	0.926
	54	54	NA	CTGAAGCT	TAATCTTA	1.2046
	55	55	NA	CTGAAGCT	CAGGACGT	1.084
	56	56	NA	CTGAAGCT	GTACTGAC	0.9345
	57	57	NA	TAATGCGC	TATAGCCT	1.0216
	58	58	NA	TAATGCGC	ATAGAGGC	1.2632
	59	59	NA	TAATGCGC	CCTATCCT	1.1508
	60	60	NA	TAATGCGC	GGCTCTGA	1.1804
	61	61	NA	TAATGCGC	AGGCGAAG	1.2449
	62	62	NA	TAATGCGC	TAATCTTA	1.0858
	63	63	NA	TAATGCGC	CAGGACGT	1.1212
	64	64	NA	TAATGCGC	GTACTGAC	1.4486
	65	65	NA	CGGCTATG	TATAGCCT	1.5127
	66	66	NA	CGGCTATG	ATAGAGGC	1.2323
	67	67	NA	CGGCTATG	CCTATCCT	1.0468
	68	68	NA	CGGCTATG	GGCTCTGA	1.0453
	69	69	NA	CGGCTATG	AGGCGAAG	1.1362
	70	70	NA	CGGCTATG	TAATCTTA	1.1136
	71	71	NA	CGGCTATG	CAGGACGT	1.1581
	72	72	NA	CGGCTATG	GTACTGAC	1.7369

## Sheet: genotype
	B	B	B	B	B	M	M	M
	BCL2	AncB4	AncB5	AncMB1_B	AncB1	AncM6	AncMB1_M	MCL1
	libB	libC	libD	libK34	libM	libJ	libK12	libL
	A	A	A	A	A	E	E	E	1
	H	H	H	H	H	A	A	A	2
	A	A	A	A	A	P	P	P	3
	G	G	G	G	G	A	A	A	4
	R	R	R	R	R	A	A	A	5
	T	T	T	T	T	D	D	D	6
						A	A	A	7
						I	I	I	8
						M	M	M	9
						S	S	S	10
						P	P	P	11
						E	E	E	12
						E	E	E	13
						E	E	E	14
						L	L	L	15
						D	D	D	16
						G	G	G	17
						Y	Y	Y	18
						E	E	E	19
						P	P	P	20
						E	E	E	21
						P	P	P	22
						L	L	L	23
						G	G	G	24
						K	K	K	25
						R	R	R	26
						P	P	P	27
						A	A	A	28
						V	V	V	29
						L	L	L	30
						P	P	P	31
						L	L	L	32
						L	L	L	33
						E	E	E	34
						L	L	L	35
						V	V	V	36
						G	G	G	37
						E	E	E	38
						S	S	S	39
						G	G	G	40
						N	N	N	41
						N	N	N	42
						T	T	T	43
						S	S	S	44
						T	T	T	45
						D	D	D	46
						G	G	G	47
						S	S	S	48
						L	L	L	49
						P	P	P	50
						S	S	S	51
						T	T	T	52
						P	P	P	53
						P	P	P	54
						P	P	P	55
						A	A	A	56
						E	E	E	57
						E	E	E	58
						E	E	E	59
						E	E	E	60
						D	E	D	61
						S	E	E	62
						I	I	L	63
	G	A	P	V	V	R	V	Y	64
	Y	S	Y	E	E	R	E	R	65
	D	D	D	Q	Q	E	Q	Q	66
	N	S	S	A	S	A	A	S	67
	R	R	R	K	R	H	K	L	68
	E	N	E	N	N	E	N	E	69
	I	L	L	L	L	L	L	I	70
	V	V	V	V	V	A	V	I	71
	M	E	E	K	K	R	K	S	72
	K	D	D	D	D	D	D	R	73
	Y	Y	Y	Y	Y	Y	Y	Y	74
	I	I	I	I	I	L	I	L	75
	H	H	H	H	H	R	H	R	76
	Y	Y	Y	Y	Y	Y	Y	E	77
	K	K	K	R	R	H	R	Q	78
	L	L	L	L	L	L	L	A	79
	S	S	S	R	R	G	R	T	80
	Q	Q	Q	Q	Q	G	G	G	81
	R	R	R	R	R	A	A	A	82
	G	G	G	G	G	K	K	K	83
	Y	Y	Y	Y	Y	D	D	D	84
	E	E	E	E	E	T	T	T	85
	W	W	W	W	W	K	K	K	86
	D	D	D	D	D	P	P	P	87
	A	A	A	A	A	M	M	M	88
	G	G	G	G	G	G	G	G	89
	D	D	D	D	D	R	R	R	90
	V	V	V	V	V	S	S	S	91
	G	G	G	G	G	G	G	G	92
	A	A	A	A	A	A	A	A	93
	A	A	A	A	A	T	T	T	94
	P	P	P	P	P	S	S	S	95
	P	P	P	P	P	R	R	R	96
	G	G	G	G	G				97
	A	A	A	A	A				98
	A	A	A	A	A				99
	P	P	P	P	P				100
	A	A	A	A	A				101
	P	P	P	P	P				102
	G	G	G	G	G				103
	I	I	I	I	I				104
	F	F	F	F	F				105
	S	S	S	S	S				106
	S	S	S	S	S				107
	Q	Q	Q	Q	Q				108
	P	P	P	P	P				109
	G	G	G	G	G				110
	H	H	H	H	H				111
	T	T	T	T	T				112
	P	P	P	P	P				113
	H	H	H	H	H				114
	P	P	P	P	P				115
	A	A	A	A	A				116
	A	A	A	A	A				117
	S	S	S	S	S				118
	R	R	R	R	R				119
	D	D	D	D	D				120
	P	P	P	P	P				121
	V	V	V	V	V				122
	A	A	A	A	A				123
	R	R	R	R	R				124
	T	T	T	T	T				125
	S	S	S	S	S				126
	P	P	P	P	P				127
	L	L	L	L	L				128
	Q	Q	Q	Q	Q				129
	T	T	T	T	T				130
	P	P	P	P	P				131
	A	A	A	A	A				132
	A	A	A	A	A				133
	P	P	P	P	P				134
	G	G	G	G	G				135
	A	A	A	A	A				136
	A	A	A	A	A				137
	A	A	A	A	A				138
	G	G	G	G	G				139
	P	P	P	P	P				140
	A	A	A	A	A				141
	L	L	L	L	L				142
	S	S	S	S	S				143
	P	P	P	P	P				144
	V	V	V	V	V				145
	P	P	P	P	P				146
	P	P	P	P	P				147
	V	K	P	K	K	K	K	K	148
	V	V	V	V	V	A	V	A	149
	H	H	H	S	S	A	S	L	150
	L	R	R	R	R	E	R	E	151
	T	T	A	T	T	T	T	T	152
	L	M	M	L	L	L	L	L	153
	R	R	R	R	R	R	R	R	154
	Q	E	E	K	K	R	K	R	155
	A	L	A	V	V	V	V	V	156
	G	G	G	A	A	G	A	G	157
	D	D	D	D	D	D	D	D	158
	D	E	E	E	E	E	E	G	159
	F	F	F	L	L	L	L	V	160
	S	E	E	E	E	I	E	Q	161
	R	E	R	E	E	E	E	R	162
	R	R	R	K	K	K	K	N	163
	Y	Y	Y	Y	Y	H	Y	H	164
	R	R	R	Q	Q	Q	Q	E	165
	R	D	R	D	D	I	D	T	166
	D	Q	A	Q	Q	A	Q	A	167
	F	F	F	F	F	F	F	F	168
	A	D	A	D	D	N	D	Q	169
	E	D	D	N	N	G	N	G	170
	M	M	M	M	M	M	M	M	171
	S	S	S	C	C	V	C	L	172
	S	D	S	D	D	N	D	R	173
	Q	Q	Q	K	K	K	K	K	174
	L	L	L	L	L	L	L	L	175
	H	H	H	H	H	N	H	D	176
	L	I	I	I	I	I	I	I	177
	T	T	T	T	T	S	T	K	178
	P	P	P	P	P	S	P	N	179
	F	N	G	D	D	E	D	E	180
	T	T	T	T	T	E	T	D	181
	A	A	A	A	A	D	A	D	182
	R	Y	Y	Y	Y	L	Y	V	183
	G	Q	Q	P	P	E	P	K	184
	R	T	R	T	T	T	T	S	185
	F	F	F	F	F	I	F	L	186
	A	T	A	T	T	S	T	S	187
	T	G	E	G	G	N	G	R	188
	V	V	V	V	V	V	V	V	189
	V	A	A	A	A	A	A	M	190
	E	N	D	K	N	N	K	I	191
	E	E	E	E	E	E	E	H	192
	L	L	L	L	L	M	L	V	193
	F	F	F	F	F	F	F	F	194
	R	R	R	R	R	S	R	S	195
	D	D	D	D	D	D	D	D	196
	G	G	G	G	G	G	G	G	197
	V	V	V	I	I	V	V	V	198
						M	I	T	199
	N	N	N	N	N	N	N	N	200
	W	W	W	W	W	W	W	W	201
	G	G	G	G	G	G	G	G	202
	R	R	R	R	R	R	R	R	203
	I	I	I	I	I	I	I	I	204
	V	V	V	V	V	V	V	V	205
	A	A	A	A	A	S	A	T	206
	F	L	F	L	L	L	L	L	207
	F	F	F	F	F	F	F	I	208
	E	A	A	A	A	A	A	S	209
	F	F	F	F	F	F	F	F	210
	G	G	G	G	G	G	G	G	211
	G	G	G	G	G	G	G	A	212
	V	A	A	A	A	V	A	F	213
	M	L	L	L	L	L	L	V	214
	C	A	C	A	A	A	A	A	215
	V	V	V	V	V	K	V	K	216
	E	Q	E	H	H	H	H	H	217
	S	C	C	C	C	L	C	L	218
	V	V	V	V	V	K	V	K	219
	N	E	D	K	E	E	K	T	220
	R	K	K	K	K	Q	K	I	221
	E	E	E	G	G	G	G	N	222
	M	M	M	M	M	T	M	Q	223
	S	P	P	P	P	G	P	E	224
	P	Q	P	D	E	D	D	S	225
	L	L	L	F	F	S	F	C	226
	V	V	V	V	V	I	V	I	227
	D	D	D	E	D	E	E	E	228
	N	N	N	N	N	N	N	P	229
	I	I	I	I	I	I	I	L	230
	A	V	A	V	V	A	V	A	231
	L	D	D	D	D	D	D	E	232
	W	W	W	W	W	Y	W	S	233
	M	V	M	V	V	V	V	I	234
	T	T	T	A	A	A	A	T	235
	E	T	T	K	K	N	K	D	236
	Y	Y	Y	F	Y	Y	F	V	237
	L	I	L	I	I	L	I	L	238
	N	D	D	D	D	G	D	V	239
	R	N	N	N	N	T	N	R	240
	H	N	N	N	N	Q	N	T	241
	L	L	L	L	L	K	L	K	242
	H	S	Q	S	S	R	S	R	243
	T	Q	D	E	E	E	E	D	244
	W	W	W	W	W	W	W	W	245
	I	I	I	I	I	I	I	L	246
	Q	Q	Q	K	K	E	K	V	247
	D	E	E	E	E	K	E	K	248
	N	N	N	H	N	N	H	Q	249
	G	G	G	G	G	G	G	R	250
	G	G	G	G	G	G	G	G	251
	W	W	W	W	W	W	W	W	252
	D	D	D	D	D	D	D	D	253
	A	G	A	G	G	G	G	G	254
	F	F	F	F	F	F	F	F	255
	V	V	V	V	V	V	V	V	256
	E	E	E	E	E	K	E	E	257
	L	F	L	H	H	F	H	F	258
	Y	Y	Y	F	F	F	F	F	259
	G	E	G	N	N	H	N	H	260
	P	P	P	P	P	V	V	V	261
	S	S	S	S	S	E	E	E	262
	M	M	M	M	M	D	D	D	263
	R	R	R	R	R	L	L	L	264
	P	P	P	P	P	E	E	E	265
	L	L	L	L	L	G	G	G	266
	F	F	F	F	F	G	G	G	267
	D	D	D	D	D	I	I	I	268
	F	F	F	F	F	R	R	R	269
	S	S	S	S	S				270
	W	W	W	W	W				271
	L	L	L	L	L				272
	S	S	S	S	S				273
	L	L	L	L	L				274
	K	K	K	K	K				275
	-	-	-	-	-				276

## Sheet: Frequency
	Protein	hsBCL2																				hsBCL2				AncB4				AncB5				AncM6				AncMB1-M		AncMB1-B		hsMCL1
	Positive Selection	NOXA																				BID				NOXA				NOXA				BID				BID		BID		BID
	Negative Selection	ZBneg																				ZBneg				ZBneg				ZBneg				NOXA				NOXA		NOXA		NOXA
	Experiment	B																				P				C				D				J				K		K		L
	Time	0				12				24				36				48				48				48				48				48				48		48		0				12
	Replicate	1	2	3	4	1	2	3	4	1	2	3	4	1	2	3	4	1	2	3	4	1	2	3	4	1	2	3	4	1	2	3	4	1	2	3	4	1	2	1	2	1	2	3	4	1	2	3	4
	Illumina Sample	1	2	3	4	5	6	7	8	9	10	11	12	13	14	15	16	17	18	19	20	21	22	23	24	25	26	27	28	29	30	31	32	33	34	35	36	37	38	39	40	41	42	43	44	45	46	47	48
SITE	1	0.0196846	0.00807495	0.00915218	0.0110034	0.0169934	0.0376628	0.00831422	0.0113969	0.0118665	0.0296285	0.00514046	0.00598398	0.0148668	0.0129256	0.00533153	0.00678194	0.0139498	0.0073611	0.00571011	0.00821143	0.00527009	0.00488514	0.00479616	0.00415402	0.00878856	0.014964	0.272556	0.00920788	0.00818978	0.00603656	0.00622019	NA	0.00348186	0.0031714	0.00332769	0.00322016	0.00533578	0.00388297	0.00288719	0.00377628	0.00389315	0.0039161	0.00410041	0.00351114	0.00233485	0.00378317	0.0146262	0.00407569
	2	0.00509547	0.00412486	0.00500177	0.00493255	0.00481702	0.0055149	0.00372706	0.00509081	0.00430323	0.00359006	0.00335641	0.00343695	0.00485568	0.0036398	0.00406492	0.00352526	0.00539904	0.00337517	0.00313921	0.00337581	0.00244683	0.00197643	0.00242092	0.00202283	0.00521898	0.00457093	0.00458111	0.00505497	0.00626277	0.00282058	0.00425047	NA	0.00295297	0.00394623	0.004135	0.00329744	0.00438418	0.00340611	0.00309793	0.00425203	0.00431241	0.00399251	0.00335109	0.00387126	0.00249537	0.0025592	0.00388227	0.00327511
	3	0.00876958	0.00709617	0.00723661	0.00851602	0.00789456	0.00715592	0.00863277	0.00991888	0.00417282	0.00420248	0.00680354	0.00537024	0.00614453	0.00679239	0.00786474	0.00728555	0.00531682	0.00599495	0.0061431	0.00611295	0.00330725	0.00399016	0.00712573	0.00335934	0.0152384	0.00708995	0.00902033	0.00944617	0.00645255	0.006142	0.0136696	NA	0.00246816	0.00309932	0.00271728	0.00368386	0.00370446	0.00364454	0.0024657	0.00386548	0.00271023	0.00236876	0.00285155	0.00297097	0.00342931	0.00283738	0.0024377	0.00232897
	4	0.0144819	0.0155906	0.0152182	0.015957	0.0108383	0.0131282	0.011882	0.0156009	0.00391202	0.00365341	0.0030238	0.00346764	0.00431616	0.00429898	0.00371145	0.00406245	0.00369985	0.00366448	0.00395107	0.00413613	0.00204351	0.00234934	0.00303757	0.00209507	0.0109795	0.0144969	0.0156082	0.0125949	0.0177518	0.0135098	0.0118036	NA	0.00414298	0.00427058	0.00586776	0.00747076	0.00570962	0.00909432	0.00204421	0.00193274	0.00591459	0.00502407	0.00516193	0.00531173	0.00288937	0.00413553	0.00529674	0.00502183
	5	0.00780412	0.00723599	0.00666903	0.00746206	0.00635579	0.00992683	0.00582951	0.00683154	0.00843258	0.00694782	0.00598712	0.00797864	0.00863232	0.00616187	0.00748181	0.00668122	0.00920851	0.00621996	0.0057913	0.00787689	0.00508187	0.00978893	0.00538997	0.00491258	0.00672066	0.00490458	0.00620274	0.00519114	0.00862774	0.0272436	0.00838245	NA	0.00238001	0.00221638	0.00238255	0.00273069	0.00326264	0.00299738	0.00387768	0.00460884	0.0032942	0.00288454	0.00339272	0.00299347	0.00164899	0.00176177	0.00312989	0.00312955
	6	0.00555138	0.00461426	0.00425683	0.00501686	0.00260922	0.0054611	0.00344037	0.00509081	0.00356429	0.00454037	0.00492879	0.00346764	0.00350688	0.00472888	0.00418274	0.00470035	0.00465907	0.00485382	0.00405932	0.00513975	0.00400635	0.00343079	0.00445358	0.0037928	0.00352035	0.00330308	0.00283786	0.00401675	0.00353285	0.00399362	0.00506502	NA	0.00328353	0.00345971	0.00348521	0.00319439	0.0248097	0.0236384	0.00250785	0.0026761	0.00420759	0.00351494	0.00428774	0.00342111	0.00213055	0.00339373	0.00337065	0.00327511
	7	0.0113441	0.0110462	0.0100035	0.00986509	0.0086974	0.00895836	0.00719929	0.0121194	0.00378162	0.0042236	0.0030238	0.00490993	0.00464587	0.00444228	0.00391764	0.0055397	0.00441241	0.0038252	0.00416757	0.00328457	0.00244683	0.00281548	0.00303757	0.00281751	0.00782846	0.00820766	0.00914195	0.00740375	0.0143358	0.010821	0.00956725	NA	0.00628058	0.00394623	0.00380026	0.00551291	0.00635536	0.00374672	0.00366694	0.00451964	0.00398299	0.00378238	0.00403797	0.00382624	0.00229107	0.00200286	0.00373179	0.00269287
	8	0.00520275	0.0051386	0.00532104	0.00539629	0.00347896	0.00379318	0.00331295	0.00413834	0.00404242	0.00416024	0.00399141	0.00368245	0.00353685	0.00361114	0.00382927	0.00406245	0.00413835	0.0044038	0.00438407	0.00465314	0.00357613	0.00270361	0.00274066	0.00281751	0.00839467	0.00762378	0.00841222	0.0086292	0.00312409	0.00262287	0.00309529	NA	0.00326149	0.00360386	0.00257945	0.00342625	0.00496194	0.00470043	0.00887231	0.00713627	0.00330918	0.00296095	0.002914	0.00303849	0.0022327	0.00203995	0.00273865	0.00596798
	9	0.00767003	0.00678156	0.00727208	0.00836847	0.00635579	0.00648337	0.00474643	0.00656879	0.00439016	0.00511055	0.00426355	0.00414276	0.0057249	0.00484352	0.0052137	0.00416317	0.00454944	0.00425915	0.00462763	0.00437943	0.00368369	0.0031511	0.00315176	0.00252854	0.00516974	0.00357	0.00368921	0.00410185	0.00429197	0.00347959	0.00512426	NA	0.00418705	0.00407237	0.00513921	0.00716163	0.00499592	0.00425764	0.00248678	0.00276531	0.00420759	0.00410713	0.00378819	0.00364619	0.00245159	0.00268902	0.00331046	0.00574964
	10	0.00324501	0.00279652	0.00297978	0.00326728	0.00381347	0.00285161	0.00232543	0.00302164	0.00252108	0.00297764	0.00241904	0.00273115	0.00353685	0.00229279	0.00282777	0.00305523	0.00279544	0.00258763	0.0027874	0.00273714	0.00204351	0.00182727	0.00191847	0.00187834	0.00576057	0.00690645	0.00743924	0.00827178	0.00491971	0.00403316	0.00368769	NA	0.00354797	0.00380208	0.00354428	0.00435365	0.0118951	0.00395109	0.0034562	0.00475752	0.00537554	0.00448919	0.00537008	0.00452397	0.00331256	0.00372754	0.00517636	0.00363901
	11	0.0130069	0.0103821	0.0123448	0.0129427	0.00950023	0.0107877	0.0164373	0.0272605	0.00352082	0.00451925	0.0127302	0.0193942	0.00536522	0.00524476	0.0103685	0.0162162	0.00454944	0.00462881	0.00741502	0.00863721	0.00357613	0.00512754	0.00392829	0.00447912	0.00706531	0.00715668	0.00831087	0.00825476	0.0154453	0.00786862	0.00722727	NA	0.00440742	0.0048472	0.00494231	0.00559019	0.00635536	0.00892401	0.00210744	0.00294371	0.00546538	0.00481394	0.00520356	0.00542426	0.0032396	0.00393153	0.00505598	0.00400291
	12	0.00885003	0.00566295	0.00723661	0.00758853	0.00602128	0.0121059	0.00560652	0.00755411	0.00269495	0.00572297	0.00317499	0.00297665	0.00452597	0.0046429	0.00409438	0.0046332	0.0034806	0.00435558	0.00324746	0.00237219	0.00252749	0.00227476	0.00237524	0.00307037	0.00334802	0.00255238	0.00277705	0.00282534	0.00792701	0.00610246	0.0063831	NA	0.00352594	0.00351377	0.00342614	0.00376114	0.00574361	0.0244559	0.00467851	0.00547114	0.00543543	0.00464201	0.00457914	0.00481657	0.00332716	0.0029301	0.00454436	0.00327511
	13	0.00295001	0.00286643	0.00266052	0.0044688	0.00260922	0.00188314	0.00162462	0.00262752	0.00291228	0.00282981	0.00317499	0.00291527	0.00242784	0.00292331	0.00285723	0.00265234	0.00271322	0.00236262	0.00405932	0.00237219	0.00188218	0.00210695	0.00212402	0.00252854	0.00307723	0.00268584	0.00316218	0.00388059	0.00251095	0.00212202	0.00210302	NA	0.00288686	0.0036399	0.00362305	0.00316863	0.00526781	0.00534759	0.00284504	0.0025869	0.00327923	0.00349584	0.00372575	0.00362368	0.00297693	0.00356063	0.00279884	0.00291121
	14	0.00364729	0.002412	0.00301525	0.00278246	0.0022078	0.00191004	0.00207059	0.00259467	0.00269495	0.00285093	0.00244928	0.0026084	0.00290741	0.00283733	0.00353471	0.00292093	0.00254878	0.00245906	0.00243559	0.00203765	0.0022855	0.00186456	0.00214685	0.00169773	0.00322493	0.00288603	0.00231083	0.00268918	0.00252555	0.00245153	0.00313972	NA	0.00643484	0.0080186	0.00756114	0.0114638	0.0104337	0.00827685	0.00280289	0.00374654	0.00955319	0.00830977	0.00842977	0.00794508	0.0240197	0.00619402	0.00662092	0.0120815
	15	0.00638275	0.00506869	0.00659808	0.00685076	0.00863049	0.00933498	0.00570209	0.0081453	0.0140398	0.00842608	0.00577545	0.00966643	0.0131883	0.00796744	0.0066865	0.0119188	0.00748191	0.00617175	0.00600779	0.0098233	0.00427523	0.00445629	0.00465913	0.00368444	0.00775461	0.00952556	0.0100339	0.00920788	0.0123212	0.0102674	0.00927105	NA	0.00211556	0.00293715	0.00242193	0.00311711	0.00404432	0.00303144	0.00366694	0.00463858	0.00311452	0.00290364	0.00274748	0.0027684	0.00147387	0.00259629	0.00258818	0.00232897
	16	0.00512229	0.0067466	0.00546293	0.0078204	0.00347896	0.00446573	0.00280326	0.0062732	0.00386856	0.00614533	0.00507998	0.00576917	0.00551509	0.00475754	0.00524316	0.00627833	0.00496053	0.00596281	0.00554774	0.00608254	0.00446345	0.00277819	0.00422519	0.0041179	0.00561286	0.00633925	0.00600004	0.00631446	0.00534307	0.00470536	0.00527236	NA	0.00456168	0.0101269	0.00506045	0.00476583	0.0093801	0.00623318	0.00528967	0.00550088	0.00604935	0.00555895	0.00761802	0.00549178	0.0052534	0.00469188	0.00586854	0.00414847
	17	0.00324501	0.00325095	0.00283789	0.00366779	0.00254232	0.00193694	0.00258028	0.00262752	0.00278188	0.00325217	0.0030238	0.00322214	0.00260768	0.00252207	0.00276886	0.00295451	0.00249397	0.00250727	0.00265209	0.00298044	0.00298459	0.00240528	0.00262647	0.00270915	0.00376652	0.00243561	0.00295948	0.00493583	0.00321168	0.00251743	0.0035544	NA	0.00279871	0.00281101	0.00271728	0.00226699	0.00363649	0.00330393	0.00219173	0.00374654	0.00401294	0.00374417	0.00428774	0.0036912	0.00358983	0.00445079	0.00325027	0.00531295
	18	0.00305728	0.00405495	0.00297978	0.0038575	0.00301064	0.00244808	0.00324924	0.00315302	0.00282535	0.00464596	0.00332618	0.00346764	0.00434613	0.00338186	0.00438894	0.00372671	0.00295988	0.00368055	0.00276034	0.00401448	0.00268882	0.00468004	0.00301473	0.00494871	0.00256025	0.00295276	0.00310137	0.00326786	0.00363504	0.00270195	0.00333225	NA	0.0040989	0.00409038	0.00439097	0.00520377	0.0102977	0.00800436	0.00354049	0.0051738	0.00799593	0.00678154	0.00697277	0.00733738	0.00418813	0.00487733	0.00695197	0.0267103
	19	0.00855503	0.00702625	0.00673998	0.00826307	0.0066234	0.00788228	0.00649847	0.00725851	0.00447709	0.00411801	0.00359832	0.00349833	0.00353685	0.00318124	0.00326961	0.00433104	0.00282285	0.00385734	0.00362633	0.0031021	0.00268882	0.00277819	0.00264931	0.00317873	0.00667143	0.00585547	0.00703383	0.0060081	0.00805839	0.00656377	0.00632386	NA	0.00429724	0.00477512	0.0053755	0.00674945	0.00808864	0.00664192	0.00636446	0.00243823	0.00576485	0.0045465	0.00591125	0.00504164	0.0040568	0.00328246	0.00547731	0.00400291
	20	0.00362047	0.00405495	0.00386662	0.00478499	0.00307754	0.00236737	0.00321738	0.00318586	0.00330349	0.00390683	0.00507998	0.00386657	0.00392651	0.00361114	0.00804147	0.00389458	0.00548125	0.00270014	0.00952587	0.00313251	0.0031997	0.00305788	0.00262647	0.00307037	0.00302799	0.00286934	0.00291894	0.0026211	0.00275912	0.00251743	0.00336187	NA	0.0030852	0.00322546	0.00352459	0.00347777	0.00445215	0.00405327	0.0032033	0.00416283	0.00402791	0.00370597	0.00445425	0.0043214	0.00277263	0.00545222	0.00340075	0.00604076
	21	0.00461274	0.00447443	0.00390209	0.00459528	0.00327825	0.00252879	0.00277141	0.00279174	0.00391202	0.003759	0.0035076	0.00395863	0.00413632	0.00444228	0.00409438	0.0039953	0.0030421	0.00369662	0.00313921	0.00285879	0.00268882	0.00481056	0.00315176	0.00332322	0.0152877	0.00363673	0.00340543	0.00605916	0.00218978	0.00181888	0.0022215	NA	0.00425316	0.00486522	0.00466664	0.00510073	0.00764682	0.00671004	0.00335083	0.00380601	0.00519586	0.00500497	0.00549496	0.0043214	0.00325419	0.003505	0.00469484	0.00262009
	22	0.00517593	0.00429965	0.00336999	0.00404722	0.00361277	0.00231357	0.00235729	0.0029888	0.00256455	0.0023441	0.00260047	0.00266978	0.00233792	0.00278001	0.00270995	0.00318952	0.00202806	0.00247513	0.00262503	0.00249384	0.00241994	0.00311381	0.0024666	0.00234793	0.00167401	0.00188509	0.00231083	0.00182115	0.00188321	0.00168707	0.00211783	NA	0.00361409	0.00313536	0.00318986	0.00309135	0.00479201	0.0261249	0.00217066	0.00240849	0.00263536	0.0039161	0.0027683	0.00281341	0.00154684	0.00211413	0.00267846	0.00181951
	23	0.00345956	0.00374034	0.00319262	0.00366779	0.00334515	0.0027171	0.00203874	0.0024633	0.00252108	0.00335776	0.00235856	0.00199466	0.00263765	0.00212083	0.00303396	0.00271949	0.00227472	0.00241084	0.00213791	0.00255467	0.00309215	0.00305788	0.00210118	0.00238405	0.00384038	0.00402042	0.00437841	0.00481669	0.00525547	0.00355867	0.00367288	NA	0.00714002	0.0129559	0.00978616	0.0106136	0.0134584	0.011683	0.00316116	0.00338973	0.00621406	0.00743104	0.00680626	0.0070673	0.00596845	0.00591584	0.00671121	0.00560408
	24	0.0125778	0.0108715	0.0119546	0.0123735	0.00963404	0.0100882	0.00809123	0.0111998	0.00452056	0.00477266	0.00396117	0.00398932	0.00455595	0.00432764	0.00488969	0.00527111	0.00345319	0.00366448	0.00487118	0.00456191	0.00330725	0.00387828	0.00306041	0.00310649	0.0074592	0.00754037	0.0104595	0.00835688	0.043562	0.00425723	0.00393946	NA	0.00301908	0.00329753	0.00279605	0.00319439	0.0038404	0.00303144	0.00297149	0.00327079	0.00366854	0.00317109	0.00385064	0.00321855	0.00328338	0.00359772	0.00285903	0.00276565
	25	0.0108078	0.00643199	0.0075204	0.00777825	0.00896501	0.00599914	0.00570209	0.00607613	0.00312962	0.00333664	0.00368903	0.00417344	0.00392651	0.00372578	0.00371145	0.00429747	0.00405613	0.00398592	0.00497943	0.00444025	0.00314592	0.00570555	0.00392829	0.00422627	0.00494818	0.00502135	0.00537166	0.00512306	0.00458394	0.00444175	0.00395427	NA	0.00606021	0.00841502	0.00762021	0.00687825	0.0102297	0.00957117	0.00474173	0.00796884	0.00712746	0.00741194	0.00682708	0.00636957	0.00418813	0.00426534	0.00647045	0.00596798
	26	0.00560502	0.0045793	0.00507272	0.00524874	0.00381347	0.00519208	0.00328109	0.00476237	0.0049987	0.00570186	0.00420308	0.00463375	0.00380661	0.0049295	0.00427111	0.00449891	0.00397391	0.00374484	0.00384282	0.00459232	0.00349547	0.00289007	0.00296905	0.00292588	0.00657295	0.00759042	0.0077433	0.00822072	0.00867153	0.00753911	0.00619057	NA	0.00357001	0.00293715	0.00320955	0.00417332	0.00438418	0.00333799	0.00151735	0.00184354	0.0039231	0.00294185	0.00347598	0.00326356	0.00267048	0.00797433	0.00325027	0.00436681
	27	0.00764321	0.0051386	0.00489535	0.00510118	0.00381347	0.0750296	0.00340851	0.00522219	0.0048683	0.371486	0.00441474	0.00515543	0.00569493	0.669093	0.00491914	0.00503609	0.00419316	0.72465	0.00368045	0.00453149	0.00449033	0.00372912	0.00363138	0.00368444	0.00280643	0.00305285	0.00338516	0.0031317	0.00506569	0.00363775	0.0726578	NA	0.00284279	0.00288309	0.00297326	0.0041218	0.00584557	0.00439388	0.00339297	0.00683893	0.00405786	0.003897	0.00412122	0.00436642	0.00274344	0.00352354	0.00415312	0.00378457
	28	0.0120146	0.00912364	0.0110678	0.0121627	0.00983475	0.00930808	0.00879205	0.0105429	0.00704164	0.00806707	0.00598712	0.00702734	0.00782304	0.00650579	0.00757018	0.00681551	0.00548125	0.00639676	0.00422169	0.00593048	0.00475922	0.00408338	0.0049332	0.0041179	0.00536668	0.00650607	0.00654734	0.00597406	0.00624818	0.00578614	0.00499097	NA	0.00539909	0.00443275	0.00313078	0.00319439	0.00441816	0.00323581	0.00404628	0.00749309	0.00537554	0.0039352	0.00514112	0.00445645	0.00358983	0.00326391	0.00436379	0.00429403
	29	0.0197651	0.016849	0.0182334	0.0202782	0.0139827	0.0146347	0.0122324	0.0162249	0.0048683	0.00608198	0.00504974	0.00530887	0.00587477	0.00584661	0.00624466	0.00627833	0.00493313	0.00543242	0.00546655	0.00474438	0.00462477	0.00576149	0.00495604	0.00494871	0.0119643	0.0161317	0.0169866	0.014399	0.0099708	0.00798724	0.0081603	NA	0.00390057	0.00542381	0.00360336	0.0041218	0.00805465	0.00616506	0.00457314	0.00443044	0.00503115	0.00443188	0.00451669	0.0043214	0.00291856	0.00354209	0.00385217	0.00385735
	30	0.00533684	0.00454434	0.00464704	0.00617622	0.00421489	0.00438502	0.00375892	0.00518935	0.00443363	0.00473043	0.00380998	0.0054623	0.00488565	0.0044996	0.00565554	0.00496894	0.0043576	0.00427522	0.00508768	0.00477479	0.00379124	0.00402745	0.00470481	0.00372056	0.00526821	0.00522154	0.004723	0.011829	0.00938686	0.00785544	0.00881194	NA	0.0027326	0.00236053	0.00218564	0.00270493	0.0036025	0.00282707	0.00522644	0.0161161	0.00217118	0.00177657	0.0020398	0.00166554	0.00176573	0.00168759	0.00189599	0.00211063
	31	0.0101373	0.00807495	0.00741398	0.00872681	0.0088312	0.00664479	0.00649847	0.00827668	0.00699817	0.0050472	0.00517069	0.00503268	0.00728352	0.00510146	0.00550826	0.00614403	0.00704341	0.00581816	0.00644079	0.00650832	0.00725982	0.00661918	0.00559552	0.00484034	0.00713916	0.00663953	0.00626356	0.00765905	0.0146861	0.0154209	0.0167797	NA	0.00359205	0.00324348	0.00332769	0.00370962	0.00441816	0.00405327	0.00438347	0.0043115	0.00315944	0.00332391	0.00353842	0.00330858	0.00274344	0.00335664	0.00334056	0.00276565
	32	0.0158496	0.0162897	0.0156084	0.0158516	0.011708	0.0133703	0.0102892	0.0156009	0.00439016	0.00511055	0.00380998	0.00438825	0.00557504	0.0044996	0.0059501	0.00483465	0.00485091	0.00390556	0.0057913	0.00437943	0.00379124	0.00270361	0.00383693	0.00335934	0.0069176	0.00759042	0.0114731	0.00801648	0.00543066	0.00630017	0.00457629	NA	0.00218167	0.00250469	0.00216595	0.00257612	0.00414628	0.00320174	0.00341405	0.00374654	0.00235086	0.00242607	0.00214387	0.00204817	0.00210136	0.00152069	0.00285903	0.00269287
	33	0.00788457	0.00716608	0.00713019	0.00769393	0.00789456	0.00780157	0.00538354	0.00696292	0.00725898	0.00810931	0.00538236	0.0052168	0.00734346	0.00627651	0.00621521	0.00617761	0.0065775	0.00570565	0.00519593	0.00629543	0.00443656	0.00330027	0.00392829	0.00357607	0.00465277	0.00502135	0.0104393	0.00536134	0.00411679	0.00401998	0.00398389	NA	0.00390057	0.00279299	0.00279605	0.00288526	0.00489396	0.00340611	0.00335083	0.00341946	0.00241076	0.00252159	0.00264341	0.00218321	0.00205758	0.00261484	0.00385217	0.00225619
	34	0.00544411	0.00440452	0.0054984	0.0057968	0.00475012	0.00330894	0.00398191	0.00400696	0.00439016	0.00363229	0.00465665	0.00435757	0.00434613	0.00401238	0.00377036	0.00423032	0.00427538	0.00385734	0.00422169	0.00456191	0.00416767	0.00501566	0.0032888	0.00274527	0.00334802	0.00370346	0.00358786	0.00442523	0.00290511	0.00289966	0.00278428	NA	0.00453964	0.00491927	0.00500138	0.00530682	0.00887031	0.00715283	0.00307686	0.0044007	0.00461188	0.00481394	0.00418366	0.00420887	0.00745691	0.00305992	0.00448417	0.00494905
	35	0.00549775	0.00471912	0.0054984	0.00556492	0.00421489	0.00446573	0.00430046	0.00479522	0.00321655	0.00297764	0.00253999	0.00368245	0.00395648	0.00346784	0.00324015	0.00372671	0.00282285	0.00273228	0.00213791	0.00352787	0.00258127	0.00290871	0.00285486	0.0114145	0.00905935	0.0095756	0.010196	0.010978	0.00763504	0.00525893	0.00521312	NA	0.00348186	0.00477512	0.00385933	0.00468855	0.00971996	0.00493886	0.00295041	0.00252743	0.00461188	0.00425995	0.00378819	0.00378123	0.00342931	0.00291156	0.00394246	0.00312955
	36	0.0161178	0.00842451	0.00840724	0.0101813	0.00776075	0.00809749	0.00809123	0.00794824	0.00665044	0.00825713	0.00592664	0.00659772	0.008992	0.00891322	0.00727562	0.00705053	0.0074271	0.00928977	0.00611604	0.00784648	0.00656073	0.00956518	0.0100719	0.00668256	0.00753305	0.00842453	0.00784465	0.00890152	0.0129927	0.0110319	0.0115666	NA	0.00451761	0.00571212	0.00472571	0.0053841	0.00880234	0.00640349	0.00609049	0.00484672	0.0072173	0.00636127	0.00622346	0.00643709	0.0828141	0.00411698	0.00583845	0.00451237
	37	0.00871594	0.00576782	0.00723661	0.00807336	0.00555295	0.0125632	0.00535168	0.0360298	0.00530296	0.00726459	0.00507998	0.114279	0.00566496	0.00596125	0.00553772	0.165318	0.006139	0.00578601	0.00554774	0.148901	0.00518943	0.00559368	0.00637205	0.00451524	0.00534206	0.00650607	0.00646626	0.00781223	0.00859854	0.00923937	0.00992269	NA	0.00390057	0.00488323	0.00417438	0.00455974	0.00598151	0.00483668	0.00413058	0.00499539	0.0050012	0.00378238	0.00451669	0.00434391	0.00434865	0.0040428	0.00421331	0.00436681
	38	0.0080723	0.00625721	0.00702377	0.00676644	0.00582057	0.00624126	0.00516055	0.00640457	0.00239068	0.00365341	0.00269118	0.00337558	0.00287744	0.00369712	0.00312233	0.00298808	0.00339838	0.00424308	0.00305802	0.00337581	0.00336103	0.00257309	0.00383693	0.00339546	0.0278427	0.00603897	0.0113717	0.00728461	0.00344526	0.00349277	0.00469477	NA	0.00570761	0.0136226	0.00693104	0.0071101	0.011963	0.00991178	0.0033719	0.00422229	0.00901414	0.00760296	0.00867954	0.00823768	0.00462591	0.00526677	0.00809558	0.0101892
	39	0.00619502	0.00716608	0.00677545	0.00771501	0.0044156	0.00556871	0.00471458	0.00683154	0.00330349	0.00312546	0.00287261	0.00303802	0.00344693	0.00338186	0.00268049	0.00318952	0.00416575	0.00392163	0.00324746	0.00380159	0.00255438	0.00229341	0.00294621	0.00270915	0.00553901	0.00548846	0.0067095	0.00611022	0.0142336	0.0118491	0.010367	NA	0.00436335	0.00459493	0.00448943	0.0049204	0.110896	0.00909432	0.00347727	0.00401415	0.00507607	0.00496676	0.00499542	0.00483907	0.00306449	0.00307846	0.00466474	0.00400291
	40	0.00858185	0.00779529	0.00677545	0.00773609	0.0064896	0.00610675	0.00586137	0.00765264	0.00269495	0.00331552	0.00338665	0.00328352	0.00368672	0.00283733	0.00335798	0.00295451	0.00315172	0.00276443	0.00270621	0.00261549	0.00252749	0.00270361	0.00242092	0.0023118	0.00644987	0.00827439	0.00788519	0.00839092	0.00550365	0.00624745	0.0045911	NA	0.00279871	0.00322546	0.0026779	0.0025246	0.00380642	0.00333799	0.00318223	0.0025869	0.00294981	0.00252159	0.00314295	0.00238578	0.00232025	0.00233667	0.00237751	0.00167394
	41	0.0107809	0.00957808	0.00929408	0.00986509	0.00796146	0.0104649	0.00735856	0.00906493	0.00504216	0.00635651	0.00504974	0.00537024	0.00722357	0.00570331	0.00712834	0.00715125	0.00726266	0.00578601	0.00755034	0.00796813	0.00656073	0.00671241	0.00678314	0.00552666	0.00876394	0.00715668	0.0318854	0.0133438	0.00728467	0.00583886	0.00765676	NA	0.0044515	0.00342367	0.490371	0.00391571	0.00802066	0.00415545	0.00649091	0.00398442	0.00425252	0.00347673	0.00347598	0.00375872	0.00246618	0.00191013	0.00349103	0.00356623
	42	0.0170832	0.00671164	0.00645619	0.00676644	0.00742624	0.0296191	0.00592508	0.00676586	0.00452056	0.0813887	0.0054126	0.00598398	0.00614453	0.0670927	0.00577337	0.00654692	0.00687897	0.0939263	0.00611604	0.00617378	0.00653384	0.00570555	0.0344182	0.00534605	0.00588366	0.00927532	0.0056149	0.00636552	0.00646715	0.00666921	0.00574628	NA	0.00438538	0.00506343	0.0807703	0.0045855	0.00621941	0.006131	0.00322438	0.00472778	0.00455199	0.00364866	0.00428774	0.00389377	0.00302071	0.0022254	0.00415312	0.00262009
	43	0.00640957	0.00471912	0.00627882	0.00666105	0.00488392	0.00478855	0.00477829	0.00486091	0.00243415	0.00162608	0.00269118	0.0021481	0.00251776	0.00192021	0.00259212	0.00288736	0.002631	0.00236262	0.00235441	0.00258508	0.00311903	0.00223747	0.00255795	0.002962	0.0125058	0.0148806	0.0163988	0.0147735	0.025854	0.0100829	0.00827878	NA	0.00533298	0.00583826	0.493128	0.00533258	0.0116911	0.00701659	0.00225496	0.00261663	0.00489638	0.00506228	0.00499542	0.00497412	0.00337093	0.00352354	0.00439388	0.00473071
	44	0.012551	0.0110812	0.0119901	0.0118676	0.00856359	0.0123211	0.187341	0.0114954	0.0048683	0.00508943	0.129207	0.0047565	0.0057249	0.00441362	0.0430351	0.00493537	0.00468647	0.00477346	0.0180775	0.00520057	0.00392568	0.00425119	0.00427087	0.00386505	0.00883779	0.0117943	0.0117366	0.0111992	0.0109781	0.00889668	0.00878232	NA	0.00619243	0.00699149	0.00653723	0.00680097	0.00910821	0.00657379	0.00413058	0.00362761	0.00440225	0.00517689	0.00478728	0.00414135	0.00334175	0.00335664	0.00478512	0.00509461
	45	0.0144551	0.0118502	0.0117772	0.0116779	0.00963404	0.0113257	0.0093973	0.0107071	0.00321655	0.00350559	0.00384022	0.00257772	0.0031472	0.00369712	0.00338743	0.00298808	0.00224731	0.00313409	0.00392401	0.00322375	0.00360302	0.00251715	0.00507023	0.00314261	0.00460353	0.00448752	0.00837168	0.00493583	0.0050365	0.00423087	0.00454667	NA	0.00334964	0.00342367	0.00378057	0.00401875	0.00496194	0.0050751	0.00305578	0.0034492	0.00489638	0.00412623	0.00445425	0.00481657	0.00280182	0.00346791	0.00514626	0.00465793
	46	0.00783094	0.0083546	0.00741398	0.00885329	0.00642269	0.00648337	0.00694444	0.00742273	0.00439016	0.00582856	0.00465665	0.00512474	0.0049456	0.0049295	0.00533153	0.00557328	0.00402872	0.00438773	0.00389695	0.00462273	0.00422145	0.00385964	0.00335731	0.00610461	0.00878856	0.0099593	0.0361827	0.0111822	0.00871533	0.00652423	0.0110631	NA	0.00579576	0.00601845	0.00533612	0.007445	0.0116232	0.00916244	0.00400413	0.00312212	0.00717238	0.00668602	0.00688952	0.00695476	0.00544311	0.00485878	0.0073432	0.00720524
	47	0.00423729	0.00290139	0.00329904	0.00341484	0.00287683	0.0041429	0.00258028	0.00236477	0.00356429	0.00485714	0.00368903	0.00377451	0.00425621	0.00481486	0.00406492	0.0032231	0.00367244	0.00482168	0.00322039	0.00343664	0.00279638	0.00266632	0.0028777	0.00198671	0.00556362	0.00608902	0.00640545	0.00801648	0.00289051	0.00249107	0.00346554	NA	0.0054652	0.00782038	0.00555271	0.0066464	0.00618543	0.00565414	0.00573223	0.00663079	0.00422257	0.00397341	0.00360087	0.0040063	0.00426109	0.00398717	0.00478512	0.00305677
	48	0.00434456	0.00318104	0.00315715	0.00316189	0.0044825	0.00419671	0.00331295	0.00400696	0.00560723	0.00485714	0.00356808	0.00408138	0.00401643	0.00404104	0.00477186	0.00392815	0.00457685	0.00363233	0.00368045	0.00367994	0.00328036	0.00244257	0.00269499	0.0026369	0.004702	0.0047878	0.00634464	0.00815264	0.00449635	0.00738095	0.00411718	NA	0.00714002	0.00735188	0.0104753	0.0069813	0.0206634	0.0102524	0.00461529	0.00434123	0.00831037	0.00766027	0.00884606	0.00751744	0.00589549	0.00517404	0.00725292	0.00574964
	49	0.00791139	0.00852938	0.00961334	0.00910624	0.00749314	0.0126977	0.0870604	0.00807961	0.0110406	0.0175279	0.246802	0.00705803	0.0084225	0.00957239	0.689358	0.00735269	0.00739969	0.00816471	0.829725	0.00644749	0.00516254	0.00376641	0.00502455	0.00419015	0.0089855	0.00964233	0.010946	0.0118971	0.00906569	0.00723597	0.00777524	NA	0.0044515	0.00619864	0.00360336	0.00510073	0.0091422	0.00684628	0.00790289	0.00401415	0.00398299	0.00399251	0.00353842	0.00416385	0.00342931	0.00298574	0.00418322	0.00320233
	50	0.0074823	0.00727095	0.00744945	0.00980185	0.00682411	0.00675239	0.00926988	0.0112655	0.012475	0.00813042	0.0146352	0.010587	0.0225999	0.00725095	0.0292498	0.0107437	0.0293247	0.00670213	0.0345313	0.00690368	0.00553897	0.00451223	0.00664611	0.00617685	0.00536668	0.00485453	0.00593923	0.00570174	0.0117226	0.00948979	0.00887118	NA	0.00453964	0.00455889	0.00448943	0.00525529	0.00533578	0.00493886	0.0057533	0.00567928	0.00353378	0.00332391	0.00347598	0.0040063	0.00452376	0.00320828	0.00297941	0.00371179
	51	0.0152596	0.0141574	0.014154	0.0147344	0.0142504	0.0104649	0.012774	0.0142543	0.0117795	0.0160708	0.00994829	0.0125203	0.0137578	0.0108907	0.00954373	0.0133289	0.00709822	0.0103827	0.00584542	0.00812019	0.00876556	0.00723449	0.00918123	0.00765785	0.00738534	0.00764046	0.00914195	0.00827178	0.00833577	0.00664285	0.00721246	NA	0.00680947	0.00731584	0.00771866	0.0087073	0.0154296	0.012262	0.00461529	0.00576849	0.00595951	0.00624666	0.00630672	0.00598695	0.00531177	0.00474751	0.0055375	0.0055313
	52	0.00683866	0.00632712	0.00645619	0.00773609	0.00669031	0.00532659	0.00423675	0.00755411	0.00395549	0.00420248	0.00426355	0.0038052	0.00479573	0.0039264	0.00382927	0.00473393	0.00383688	0.00340732	0.00365339	0.00486603	0.00403323	0.00402745	0.00406532	0.00314261	0.00507127	0.0061057	0.00606085	0.00668891	0.184117	0.00564115	0.00694588	NA	0.00601613	0.00630676	0.00630095	0.005719	0.0114192	0.00967335	0.00368802	0.00398442	0.00534559	0.00550164	0.00559903	0.00490659	0.00426109	0.00554494	0.00529674	0.0058952
	53	0.0150719	0.0137379	0.0129833	0.015156	0.0114404	0.0110836	0.0133473	0.015995	0.011171	0.0139168	0.0132442	0.0113235	0.0132482	0.0104609	0.0140799	0.0135639	0.0100855	0.0118131	0.00974237	0.0098233	0.00881934	0.00788708	0.009638	0.0112339	0.0111272	0.0131956	0.0134596	0.0132246	0.0155474	0.0135889	0.0136696	NA	0.00526687	0.00670319	0.00484385	0.00535834	0.0093801	0.00708471	0.00558471	0.00472778	0.0038632	0.00414534	0.00430855	0.00416385	0.00313745	0.0049515	0.00397255	0.00393013
	54	0.0126314	0.0116755	0.0119191	0.0135961	0.011708	0.0106263	0.00987513	0.0147141	0.0123881	0.0148037	0.0117021	0.0155277	0.0142673	0.0142153	0.0115762	0.0150076	0.0100033	0.0120221	0.00887638	0.0129558	0.00973354	0.00840916	0.00920407	0.00913885	0.00644987	0.0080742	0.00689194	0.00764203	0.00931387	0.00619473	0.0886378	NA	0.00550928	0.00538778	0.00511952	0.00559019	0.0130506	0.00967335	0.00636446	0.00609557	0.0043723	0.00447008	0.00385064	0.00391627	0.00354605	0.00411698	0.00475503	0.00327511
	55	0.0108078	0.00968294	0.00879745	0.0104132	0.00909882	0.00796298	0.00809123	0.0236148	0.0107363	0.0121217	0.00946449	0.0322214	0.0130084	0.00988765	0.0112816	0.0489172	0.0120314	0.0103345	0.00792921	0.0484474	0.0102982	0.00889394	0.010483	0.00942783	0.00507127	0.00532163	0.00693248	0.0056677	0.00614599	0.00528529	0.0109298	NA	0.010666	0.0116044	0.0112433	0.0134989	0.0282423	0.0229572	0.00775537	0.00799857	0.00756169	0.00748835	0.0075972	0.00803511	0.00691698	0.00697291	0.00695197	0.00691412
	56	0.0167882	0.0148565	0.0169564	0.0188238	0.0132468	0.0147423	0.0128058	0.0401682	0.00312962	0.00350559	0.00353784	0.105564	0.00464587	0.00401238	0.00362308	0.113648	0.00383688	0.00348768	0.00332864	0.0995408	0.0038719	0.00313246	0.00342583	0.00307037	0.0119643	0.00792406	0.00843249	0.00655275	0.0165693	0.0140502	0.0114481	NA	0.00868262	0.00863125	0.0101012	0.00937709	0.0279364	0.0240131	0.00617479	0.00493592	0.00642369	0.00626576	0.00670219	0.00607698	0.0168109	0.00578603	0.00725292	0.00786026
	57	0.0185582	0.0212535	0.0187655	0.0211847	0.0197364	0.0187507	0.0170426	0.0206917	0.0174302	0.0200621	0.0159959	0.0170927	0.0201121	0.017024	0.0186456	0.0171899	0.0137854	0.015349	0.0126651	0.0141115	0.0137668	0.0110382	0.0133836	0.0135096	0.0126536	0.0136461	0.013946	0.0151819	0.0165547	0.0124422	0.0137733	NA	0.0169465	0.00724377	0.00781711	0.00816631	0.00999184	0.00844715	0.011907	0.0095745	0.00739698	0.00699167	0.00695196	0.00600945	0.00567659	0.0064351	0.00647045	0.00618632
	58	0.00868912	0.00866921	0.00851366	0.00784148	0.00722553	0.00734424	0.00716743	0.00830952	0.00434669	0.00323105	0.00329594	0.00386657	0.00380661	0.00358248	0.00359363	0.00376028	0.00342578	0.00340732	0.0027874	0.00480521	0.00287704	0.00275955	0.0028777	0.00307037	0.00750843	0.00897504	0.0103582	0.00835688	0.00881752	0.00738095	0.0075679	NA	0.00667724	0.00733386	0.0080534	0.00757381	0.0146139	0.0102183	0.00379339	0.00291398	0.0068729	0.00748835	0.00720173	0.00735989	0.0070775	0.00578603	0.00689178	0.00574964
	59	0.0120414	0.00905373	0.0092586	0.00997049	0.0101024	0.00804369	0.00716743	0.00916346	0.00917152	0.00965092	0.00831544	0.00899132	0.0111501	0.00911384	0.0094259	0.00903139	0.00887963	0.00904868	0.00782096	0.00869803	0.00814713	0.00732771	0.011191	0.00635746	0.00859162	0.00970906	0.0105203	0.00912278	0.0110511	0.00873852	0.00944877	NA	0.00722817	0.00927995	0.00811247	0.00844969	0.0434339	0.0138629	0.0093781	0.00719574	0.00967298	0.00899748	0.0086171	0.0089129	0.00729639	0.0109786	0.00713254	0.00727802
	60	0.0134091	0.0127242	0.0105357	0.0133642	0.0113066	0.0184009	0.0156409	0.0125464	0.0144745	0.0176758	0.0179614	0.0143922	0.0152564	0.0118079	0.0185867	0.0135303	0.0126891	0.010463	0.0111496	0.0105228	0.00863112	0.00885665	0.00908987	0.00718827	0.00435735	0.00518818	0.00421624	0.00505497	0.0059854	0.00561479	0.00573147	NA	0.0106439	0.012145	0.0103769	0.0103818	0.0270527	0.0110699	0.0060062	0.00686866	0.0110805	0.00993352	0.010761	0.0102858	0.036015	0.00847505	0.0092091	0.00866084
	61	0.0137846	0.0143671	0.0145796	0.0141442	0.0133137	0.0121059	0.0137296	0.0134332	0.0170825	0.0169577	0.0147864	0.0168779	0.0176843	0.0159062	0.0148753	0.0148061	0.0124973	0.0133239	0.0126651	0.0132904	0.0125299	0.0111314	0.0126299	0.011559	0.00640063	0.00744028	0.00747978	0.00697825	0.00633577	0.00537755	0.00590919	NA	0.0130239	0.0128658	0.0140196	0.0140399	0.0235862	0.0186314	0.0117174	0.0124587	0.0147041	0.0144227	0.0150487	0.0147648	0.0124622	0.0111455	0.0134525	0.0131004
	62	0.0230101	0.0193659	0.022171	0.0221965	0.0199371	0.019746	0.0225854	0.0235491	0.0107798	0.0110025	0.0146049	0.0119986	0.0120493	0.0120371	0.0127544	0.011818	0.0111269	0.0105916	0.0100401	0.0109182	0.0102175	0.0102178	0.010917	0.0107643	0.00736072	0.0074236	0.0120001	0.00755693	0.00567883	0.0058125	0.00530198	NA	0.0108643	0.010307	0.0102587	0.0112319	0.0171629	0.0160087	0.00663843	0.00651185	0.00967298	0.0104493	0.0101157	0.0109836	0.0108133	0.00806706	0.00914891	0.00960699
	63	0.0244583	0.0254134	0.0239092	0.0248103	0.0242189	0.0212795	0.0220438	0.0249614	0.0259498	0.0284248	0.0258837	0.0279559	0.0285346	0.0263098	0.0266282	0.0259527	0.0198695	0.0205082	0.0202425	0.020711	0.0201124	0.0180862	0.0197328	0.0179887	0.0147707	0.0174163	0.017088	0.017735	0.0154307	0.0132725	0.0153135	NA	0.00892503	0.00937004	0.0092939	0.0101499	0.0228045	0.0186655	0.0203789	0.0194463	0.00799593	0.00865363	0.00818	0.00805762	0.0074861	0.00736235	0.00752378	0.00909753
	64	0.00675821	0.0069913	0.00666903	0.0073145	0.00742624	0.0068331	0.00592508	0.00656879	0.00491176	0.00464596	0.00450546	0.00484856	0.00467584	0.00467156	0.00412383	0.00443176	0.00375466	0.00358411	0.0033557	0.00386241	0.00381813	0.00367318	0.00447642	0.00299812	0.0116688	0.0136628	0.0134393	0.0133268	0.0155328	0.0123631	0.0127514	NA	0.00559743	0.00621666	0.0076399	0.00613118	0.0214791	0.017303	0.00893553	0.00850406	0.0156025	0.0150149	0.014903	0.0138645	0.0311118	0.0122768	0.0137535	0.0165939
	65	0.0208646	0.0238403	0.0210713	0.0221121	0.0225463	0.0192618	0.0206422	0.0224653	0.0221247	0.0243702	0.0224971	0.0226164	0.0239487	0.0211796	0.0256561	0.020883	0.0195133	0.0216654	0.0212167	0.0201332	0.0202737	0.0178065	0.021263	0.018675	0.00795155	0.00860803	0.0097298	0.00915682	0.00440876	0.00430995	0.0995083	NA	0.00634669	0.00663111	0.00728547	0.00863002	0.0274266	0.0270105	0.0143306	0.0105557	0.00455199	0.00466111	0.00493298	0.00490659	0.00439243	0.00482169	0.00382208	0.00473071
	66	0.0229833	0.0201	0.0230223	0.0225759	0.0188667	0.0215754	0.020897	0.023779	0.0182996	0.0200832	0.0185359	0.0211127	0.0195426	0.019804	0.0197649	0.0221924	0.0175126	0.0184188	0.0175633	0.0203461	0.0178538	0.015625	0.0172433	0.0169773	0.0101672	0.0104097	0.0130541	0.0113865	0.00951825	0.0109528	0.00873789	NA	0.010666	0.0116044	0.0108494	0.0118502	0.0165851	0.0163493	0.0137616	0.0108531	0.0080109	0.00735463	0.0077429	0.00835021	0.00732558	0.00827105	0.00821596	0.00851528
	67	0.0191214	0.0170588	0.0185527	0.0193086	0.0181307	0.0184278	0.016947	0.0184583	0.0143441	0.0135577	0.0148771	0.0141161	0.0160657	0.0154477	0.0171728	0.015444	0.0133194	0.0151883	0.01483	0.0157234	0.0138474	0.0129027	0.0145027	0.0139792	0.00952709	0.0106099	0.00979061	0.010978	0.00871533	0.0123499	0.00663487	NA	0.00978448	0.00927995	0.0103966	0.0114638	0.0330682	0.0636602	0.0120335	0.0112694	0.00732211	0.00647589	0.00749313	0.00742741	0.00563282	0.00623111	0.00752378	0.00713246
	68	0.0183169	0.016849	0.0156084	0.0174536	0.0226132	0.0186431	0.0159595	0.017473	0.017126	0.018964	0.0172659	0.0161107	0.0183736	0.0180557	0.0186162	0.0168541	0.0141416	0.0140793	0.0133958	0.015693	0.0148692	0.0128095	0.0134064	0.0139792	0.00590827	0.00555518	0.0195407	0.00624638	0.0578394	0.00427041	0.00462072	NA	0.00921151	0.00962232	0.0104163	0.00945438	0.0241979	0.0242174	0.013888	0.0143617	0.00796598	0.00773669	0.00809674	0.00778753	0.00739854	0.0064351	0.00836644	0.0077147
	69	0.0255578	0.0259727	0.0256474	0.0270447	0.0257577	0.0251264	0.0251656	0.0249943	0.0284708	0.0261652	0.0253697	0.0302882	0.0284747	0.0258799	0.0260391	0.0254491	0.0251864	0.0261978	0.0225698	0.0267936	0.0253825	0.0234748	0.0252598	0.0230819	0.00598213	0.0074236	0.00741897	0.00743779	0.00912409	0.00832993	0.00796777	NA	0.00916744	0.00906372	0.00891978	0.00927405	0.0159394	0.0152253	0.0116752	0.00981238	0.0149886	0.0132956	0.0141745	0.0159802	0.0131043	0.0131855	0.0134826	0.0150655
	70	0.0135432	0.0105569	0.0123093	0.012774	0.0100355	0.0115678	0.00907875	0.0123822	0.00595497	0.00551179	0.00650116	0.00589192	0.00641429	0.00641981	0.00630357	0.00664764	0.00531682	0.00560922	0.00500649	0.00553511	0.00599607	0.00518347	0.00561836	0.00614073	0.0134413	0.0153977	0.0169663	0.0158968	0.0104672	0.00896258	0.0135659	NA	0.00694169	0.00704555	0.00724609	0.0071101	0.0175027	0.0166559	0.00406735	0.00437097	0.00850503	0.00777489	0.00801349	0.00841774	0.0104484	0.00671328	0.00743349	0.0069869
	71	0.0131141	0.0109414	0.00979071	0.0125211	0.011708	0.012886	0.0104804	0.0198049	0.0108667	0.0109602	0.0103414	0.0124283	0.0102209	0.0110054	0.0105747	0.0101393	0.0109077	0.012231	0.0110143	0.0113439	0.00970665	0.00934144	0.00986639	0.00917497	0.00910859	0.00917523	0.00833114	0.0103653	0.0101168	0.0090812	0.010367	NA	0.00511261	0.00434266	0.00472571	0.0058478	0.0419386	0.0129092	0.0110851	0.0123695	0.0091489	0.00825246	0.00895013	0.00904794	0.00678565	0.00684309	0.00815577	0.00684134
	72	0.0159569	0.0156255	0.0146861	0.0168423	0.0151201	0.0138545	0.0141119	0.0144842	0.0135617	0.0128397	0.0142421	0.0154663	0.0137877	0.0157343	0.0142567	0.0147054	0.0134291	0.0131632	0.0128275	0.0147502	0.012261	0.0135926	0.0145484	0.0134374	0.0121366	0.0117276	0.0118379	0.0114716	0.0223066	0.0110582	0.0105447	NA	0.00597206	0.00619864	0.00685228	0.00654336	0.00941408	0.00599475	0.00988388	0.00936636	0.00747185	0.00701077	0.00807593	0.00720234	0.0105214	0.00675037	0.00653064	0.00713246
	73	0.0193092	0.018492	0.0179142	0.0197723	0.0180638	0.0191542	0.0156728	0.0211187	0.0204295	0.0188795	0.0181428	0.0219413	0.019123	0.0185716	0.0189402	0.0198758	0.0179785	0.0173902	0.0175092	0.0195554	0.0172622	0.0166692	0.0160786	0.0153157	0.0203097	0.0154478	0.0150812	0.0157606	0.0218978	0.0206535	0.0252806	NA	0.0117458	0.0118567	0.0116174	0.0122624	0.0124048	0.0290201	0.0159533	0.0173055	0.00265287	0.00227934	0.00215381	0.00262822	0.00228117	0.00254893	0.002432	0.00222009
	74	0.00960094	0.00824973	0.00794608	0.00860034	0.00789456	0.00729043	0.0066896	0.0102473	0.00586803	0.00515279	0.00529165	0.00573848	0.00632437	0.00452826	0.00527261	0.00557328	0.00561829	0.00503062	0.00508768	0.00662997	0.00553897	0.00564961	0.00461345	0.00437076	0.010241	0.00834112	0.00851357	0.00976955	0.0168321	0.0140502	0.0131661	NA	0.0113932	0.0104332	0.00966802	0.0106652	0.0102297	0.0103886	0.00434132	0.00454937	0.00805008	0.00692122	0.00702709	0.00632335	0.0126116	0.0038416	0.00667128	0.0180635
	75	0.00999907	0.00934181	0.00948808	0.00958438	0.00927043	0.00727814	0.00739477	0.00858718	0.004569	0.00413127	0.00396401	0.00496865	0.0055069	0.00507493	0.00617413	0.00508421	0.00515893	0.00465554	0.00487233	0.00486554	0.00367984	0.00385362	0.00363483	0.00326031	0.00883708	0.0093966	0.0100768	0.0104405	0.00940692	0.00828801	0.00670598	NA	0.00259867	0.0025008	0.00198104	0.00289206	0.0177057	0.00547771	0.00216786	0.00347748	0.00320174	0.00319441	0.00321984	0.00299253	0.0030144	0.00296768	0.00330217	0.00191735
	76	0.0135481	0.0103722	0.0113236	0.0133129	0.0107515	0.00941081	0.00955631	0.0176338	0.00913801	0.00655412	0.00738271	0.0125872	0.0144319	0.00677543	0.00823912	0.00978256	0.0134428	0.00741378	0.00808332	0.00899334	0.00632732	0.0141505	0.00905036	0.0055151	0.00458687	0.00579637	0.00748253	0.00898529	0.00622872	0.00595701	0.0119137	NA	0.00489605	0.00390195	0.0044068	0.00377226	0.00508281	0.00351058	0.00312251	0.00339784	0.00250912	0.002479	0.00232786	0.00234198	0.00213452	0.00229404	0.0026105	0.00216964
	77	0.014011	0.0117734	0.0136855	0.0132251	0.0103675	0.0135915	0.00894956	0.0114496	0.00322278	0.00371193	0.00329285	0.00335975	0.00474732	0.00364013	0.00314964	0.00410822	0.00896803	0.00280608	0.00308534	0.00316172	0.00271409	0.00300583	0.00339618	0.00258996	0.00456583	0.00613839	0.0101196	0.00686023	0.00523553	0.00524907	0.0337474	NA	0.00384152	0.00434536	0.00355778	0.00349562	0.00370271	0.00414611	0.00413683	0.0153965	0.00815462	0.00693786	0.00800609	0.00718208	0.00580069	0.00609923	0.00700596	0.00736667
	78	0.0110484	0.00989133	0.0101764	0.010045	0.00724081	0.010054	0.00790671	0.0104601	0.00330437	0.00392936	0.00348162	0.00359636	0.0038216	0.00316187	0.00375454	0.00369967	0.00312494	0.00310901	0.00305742	0.0030739	0.00243102	0.00299041	0.0032126	0.00262043	0.00565994	0.00714646	0.0080614	0.00545123	0.0377554	0.00590521	0.00517146	NA	0.00387918	0.00372459	0.003861	0.00324414	0.00262556	0.00214872	0.00252586	0.00260147	0.00764496	0.00544048	0.00587403	0.00653153	0.00612657	0.00573509	0.00571186	0.00524749
	79	0.0120359	0.00983638	0.0107028	0.0131155	0.00927043	0.00954622	0.00944255	0.0390134	0.00681271	0.00627456	0.00610332	0.0182184	0.0079755	0.00738654	0.0068416	0.01035	0.00893105	0.00701519	0.0071619	0.00894065	0.00740963	0.01469	0.00706772	0.00540845	0.00683822	0.00871256	0.00973372	0.00979373	0.0084563	0.00678581	0.0150069	NA	0.00323893	0.0037778	0.0031737	0.00369681	0.00191868	0.00160397	0.00475338	0.00562767	0.0106245	0.0085517	0.00963777	0.00923782	0.00651763	0.00609923	0.00952721	0.00842626
	80	0.007345	0.00637441	0.00615443	0.00778594	0.00554032	0.00633029	0.00521426	0.00674959	0.00569086	0.00403808	0.00408985	0.00752396	0.00626647	0.00499522	0.00465145	0.00701348	0.00593554	0.00543678	0.00442558	0.00595458	0.00359658	0.00388445	0.00354304	0.00353454	0.00502872	0.00603039	0.00694653	0.00625967	0.00729285	0.00618147	0.0560644	NA	0.0031636	0.00659785	0.00375993	0.00342018	0.00858355	0.00505402	0.00334129	0.00315893	0.00409038	0.0036769	0.00393778	0.00335684	0.0275696	0.00307692	0.00374841	0.00322922
	81	0.00666605	0.00498688	0.00511519	0.00574624	0.0654964	0.023527	0.00437998	0.0046293	0.0660058	0.0140712	0.0041318	0.00435348	0.0756486	0.00831651	0.00467231	0.00453947	0.0695623	0.00644122	0.00392299	0.00440885	0.00462894	0.00471684	0.00376333	0.00301655	0.00347171	0.00381624	0.00407358	0.00466588	0.00534904	0.00516274	0.00524395	NA	0.00323893	0.00457593	0.00327478	0.00331959	0.00306315	0.00226977	0.00284407	0.00337129	0.00307105	0.00279511	0.00263244	0.00294049	0.00286776	0.00262176	0.00245432	0.00227055
	82	0.00663519	0.00637441	0.00574953	0.00629455	0.00504663	0.00595792	0.00443686	0.00692628	0.00416106	0.00551354	0.00408985	0.00473205	0.00496095	0.00480923	0.0045263	0.00562894	0.00467817	0.00381053	0.00392299	0.00384676	0.00469554	0.00306748	0.00339618	0.00303178	0.0049656	0.00448229	0.00463102	0.00459659	0.00856981	0.00683761	0.00822841	NA	0.00659084	0.00592388	0.00553882	0.00573383	0.00935775	0.00496323	0.00326173	0.00353057	0.00578926	0.00477498	0.00452518	0.00523042	0.00392687	0.00566227	0.00562262	0.00852717
	83	0.00651174	0.00506931	0.00472379	0.00581204	0.00455293	0.00465463	0.00375427	0.00533607	0.00242728	0.00237626	0.00218125	0.00300485	0.00332313	0.00297587	0.00252388	0.00322302	0.00334683	0.00349165	0.00356001	0.00319685	0.00431257	0.00368406	0.00503001	0.00356501	0.00629116	0.0077405	0.00904764	0.00831543	0.00419977	0.00464474	0.00432566	NA	0.00207141	0.0033344	0.00299177	0.00259028	0.00427494	0.00375269	0.00270485	0.00321202	0.00307105	0.00307795	0.00291526	0.00268027	0.00211823	0.00313154	0.00267744	0.0030274
	84	0.00913496	0.00692393	0.00728814	0.00813686	0.00658256	0.006855	0.0056314	0.00788042	0.0053441	0.00633668	0.00425764	0.00608068	0.00621899	0.00874163	0.006341	0.00719506	0.00588007	0.00771671	0.00639406	0.00727196	0.00612751	0.00514844	0.00565418	0.00461623	0.00702758	0.00757849	0.0087046	0.00826924	0.527596	0.00581887	0.00538895	NA	0.00256101	0.00349402	0.00309285	0.00364651	0.00558772	0.00460007	0.00391806	0.00400839	0.00679552	0.00592297	0.00672251	0.0052044	0.00317734	0.00495221	0.00568955	0.00560069
	85	0.00228374	0.0022805	0.00210546	0.00247834	0.00191991	0.00220037	0.00176337	0.00363983	0.00308	0.00256263	0.00224417	0.00279191	0.00301455	0.00273674	0.00250302	0.00245131	0.00286607	0.00245532	0.00180095	0.00216051	0.00209801	0.00183432	0.00154205	0.00191962	0.00378732	0.00433828	0.00493118	0.00642136	0.00279512	0.0026936	0.00256156	NA	0.00372853	0.0031393	0.00315349	0.00865104	0.00451057	0.00375269	0.00198886	0.00270765	0.00565858	0.0042093	0.00478625	0.00385126	0.00254188	0.00318616	0.00452933	0.00262374
	86	0.00728328	0.00787185	0.00767954	0.00936506	0.00965442	0.0102571	0.00620023	0.00770372	0.0132583	0.0120521	0.00467711	0.00518159	0.0183721	0.00789138	0.00581953	0.00608289	0.0150515	0.00637745	0.00537492	0.0057438	0.00394625	0.00380738	0.00392855	0.00399159	0.006207	0.00559836	0.00574589	0.0145751	0.00753405	0.00588794	0.00737053	NA	0.00282465	0.00264269	0.00327478	0.00289206	0.00639558	0.00354084	0.00308274	0.00326511	0.00351537	0.00336079	0.00378549	0.00317469	0.00255817	0.00380519	0.00339142	0.00287603
	87	0.0166034	0.0152354	0.0166817	0.017809	0.0112452	0.0167905	0.0134433	0.0218037	0.00318199	0.00364981	0.00358648	0.00669585	0.00341807	0.00390583	0.00339994	0.00444868	0.0034023	0.00318872	0.00386715	0.00365355	0.00314701	0.00331412	0.0880069	0.00315366	0.0042923	0.00532834	0.00737533	0.00496616	0.0114217	0.00972114	0.00833716	NA	0.00225972	0.00225249	0.00256726	0.00253999	0.00326511	0.00275399	0.00173031	0.00191128	0.00431254	0.00336079	0.00345915	0.00359104	0.00627322	0.00282203	0.00401615	0.00348151
	88	0.00574021	0.00629199	0.00569554	0.00717184	0.00449808	0.0050947	0.00430413	0.00445261	0.00503814	0.00641434	0.00545313	0.00572578	0.00481853	0.00467637	0.00648701	0.00537927	0.00504798	0.00476714	0.00622653	0.00470745	0.00449573	0.00422357	0.00495658	0.00437247	0.00406085	0.00446429	0.00681789	0.0088236	0.00466799	0.00395407	0.00699596	NA	0.00640253	0.00712994	0.00566011	0.0268836	0.0049145	0.00375269	0.00413683	0.00584004	0.0050313	0.00524083	0.00561297	0.00486612	0.00369876	0.00389622	0.00551106	0.00474292
	89	0.00669691	0.00688272	0.0062624	0.00739116	0.00597916	0.00626259	0.00547971	0.00724433	0.00377351	0.00307515	0.00297825	0.00397492	0.00467611	0.00371984	0.00371282	0.00408552	0.00349476	0.00428883	0.00478856	0.00374137	0.00371314	0.00337577	0.00402034	0.00359548	0.00999432	0.00561636	0.00574589	0.00801515	0.0124858	0.0107399	0.010065	NA	0.00297529	0.00328119	0.00349714	0.00301781	0.00403932	0.00160397	0.00465394	0.00472512	0.00491368	0.00402629	0.00469923	0.00465794	0.00391058	0.0040965	0.00497557	0.00438973
	90	0.00620313	0.00531659	0.00519617	0.0059217	0.00455293	0.00507777	0.00437998	0.00427592	0.00259046	0.00267135	0.00354454	0.00328877	0.00344181	0.00342757	0.00285762	0.0034727	0.00351325	0.00318872	0.00308534	0.00356572	0.00556138	0.00277461	0.00407541	0.0026509	0.0117197	0.0132668	0.014622	0.0139053	0.0151107	0.0123975	0.0160823	NA	0.00365321	0.00384875	0.00456852	0.0178553	0.00555406	0.00505402	0.00363962	0.0036102	0.0034631	0.0026121	0.00321984	0.00270629	0.00244411	0.00309513	0.00296749	0.00257329
	91	0.0050304	0.00460222	0.00422442	0.00473736	0.00466264	0.00385911	0.00284414	0.00395788	0.00428344	0.00518738	0.00463516	0.00506329	0.00458117	0.00390583	0.00486004	0.00472105	0.0046042	0.00435261	0.00344832	0.00519928	0.00338012	0.00332953	0.0033411	0.00284896	0.00218823	0.00232215	0.00216543	0.00318758	0.0108541	0.00713114	0.00664556	NA	0.002674	0.00283779	0.00299177	0.00284177	0.00508281	0.00417638	0.00461416	0.00390221	0.00994498	0.00930039	0.0100946	0.00809285	0.00746269	0.00706418	0.00968339	0.00691256
	92	0.00466006	0.00461596	0.00438638	0.00541726	0.00383982	0.00577174	0.00346985	0.00332179	0.00407947	0.00585522	0.00371233	0.00421152	0.00432006	0.00390583	0.00450544	0.00424441	0.00369816	0.00344382	0.0037415	0.00323198	0.00407946	0.00373031	0.00409377	0.00318413	0.00252488	0.00212414	0.00310879	0.0028873	0.00333428	0.0029526	0.00347986	NA	0.00297529	0.0029442	0.00323435	0.00296751	0.00504915	0.00348031	0.00250597	0.00284038	0.00393356	0.00306131	0.00367671	0.00374717	0.00294923	0.00373236	0.00363685	0.00433927
	93	0.00805481	0.00758336	0.00790898	0.00945279	0.00680197	0.00831062	0.00604854	0.00621952	0.00479337	0.00546694	0.0029363	0.0035727	0.0055069	0.00358699	0.00398398	0.0034727	0.0186942	0.0036192	0.00351813	0.00360085	0.00414606	0.00302124	0.00405706	0.0029099	0.00317714	0.00396025	0.0040307	0.00455039	0.00246879	0.0027454	0.00218699	NA	0.00598825	0.00533858	0.00566011	0.00611106	0.00821328	0.00450928	0.00473349	0.00384911	0.0105723	0.00964978	0.00970303	0.0105129	0.00534446	0.00801092	0.00867935	0.0130683
	94	0.00395025	0.00392906	0.00403547	0.00552692	0.00340099	0.0037237	0.00358362	0.00413457	0.00203973	0.00225201	0.00184568	0.0018455	0.00170904	0.0019662	0.00189813	0.00213355	0.00157172	0.0021205	0.00175906	0.00149304	0.00168174	0.00161852	0.00176234	0.00159968	0.00721695	0.00721846	0.00889756	0.00709122	0.0144438	0.0116895	0.0103671	NA	0.00406749	0.00322798	0.00268855	0.00362137	0.00558772	0.00426717	0.00268496	0.00310584	0.00476993	0.0035438	0.00395953	0.00348695	0.00729975	0.0032772	0.00394922	0.00378425
	95	0.00678949	0.00567378	0.00541212	0.0059875	0.00449808	0.0047054	0.00401972	0.00512404	0.00422225	0.00458167	0.00425764	0.00475571	0.00401149	0.00446381	0.00460974	0.00469835	0.00377212	0.00403374	0.00372754	0.00407511	0.00409611	0.00397694	0.00424063	0.00446388	0.122394	0.014923	0.216629	0.0309057	0.00725028	0.00637141	0.00589643	NA	0.00289997	0.00409705	0.00382057	0.00414948	0.00451057	0.00351058	0.00268496	0.00257493	0.00530573	0.00422594	0.00424236	0.00465794	0.00364987	0.00376878	0.00479707	0.0053484
	96	0.0121902	0.0146996	0.0138475	0.0147823	0.0108612	0.0114419	0.0101251	0.0128278	0.00958675	0.0115241	0.0109063	0.0103159	0.00961333	0.00847593	0.00924033	0.010577	0.00704499	0.00840229	0.0074132	0.00776378	0.00820887	0.00690569	0.00638849	0.00822694	0.00549162	0.00446429	0.00947644	0.0277412	0.00561862	0.0045066	0.00428941	NA	0.00429346	0.00344081	0.003578	0.00362137	0.00757372	0.00372242	0.00196897	0.00268111	0.00274434	0.00259546	0.00254541	0.00255016	0.00249299	0.00262176	0.002789	0.00166507
	97	0.017128	0.0144386	0.0162364	0.0166904	0.0113001	0.0150302	0.0124194	0.01463	0.00420185	0.00363427	0.0040479	0.00388028	0.00507964	0.00441067	0.00483918	0.0042898	0.00486308	0.00452799	0.0050957	0.00446154	0.0049453	0.00445479	0.00800397	0.00414394	0.00498664	0.00561636	0.00656061	0.00692953	0.00988933	0.00859881	0.0243953	NA	0.00391684	0.00473555	0.00363864	0.00404889	0.0035344	0.00248161	0.00270485	0.00323857	0.00471766	0.00479161	0.00548243	0.00523042	0.0035847	0.00358671	0.00432852	0.00287603
	98	0.0088572	0.00843511	0.00894821	0.00866323	0.00735052	0.00748125	0.0069397	0.00841049	0.00577245	0.00419339	0.00343967	0.00388028	0.005768	0.00419811	0.0048809	0.0042898	0.00386457	0.00341194	0.00337852	0.00391702	0.00333017	0.0028671	0.00363483	0.00318413	0.00479727	0.00838854	0.00786844	0.0073222	0.00438422	0.00353967	0.00410817	NA	0.00297529	0.00301515	0.00293113	0.00387285	0.00238993	0.00208819	0.00218775	0.00281384	0.00759269	0.00632227	0.00672251	0.00752036	0.00475787	0.00578971	0.00720676	0.00539886
	99	0.0148443	0.00866865	0.00955556	0.00958438	0.0611629	0.178484	0.529996	0.0755884	0.0869539	0.182723	0.523669	0.0668402	0.132189	0.122808	0.209482	0.0484588	0.154527	0.157045	0.0808751	0.040189	0.00486205	0.00420816	0.0379638	0.00968951	0.0156963	0.00410426	0.00621757	0.00711431	0.00614359	0.00547354	0.0108625	NA	0.0042558	0.00336987	0.00331521	0.00362137	0.00366905	0.00354084	0.00212808	0.00249529	0.00394663	0.00364362	0.0042206	0.00400739	0.00280258	0.00324078	0.00448471	0.00464201
	100	0.0108323	0.00695141	0.00843534	0.00894835	0.0391114	0.00661803	0.00517634	0.00763305	0.0341451	0.00349449	0.00270559	0.003691	0.0337297	0.00334786	0.00339994	0.00338191	0.0325438	0.00315684	0.00360189	0.00340763	0.00427927	0.00354533	0.00462615	0.00354977	0.0247228	0.0201433	0.0328674	0.0387592	0.0126135	0.0101873	0.00953336	NA	0.00218439	0.00315704	0.00307263	0.00767025	0.0192204	0.00571982	0.0029634	0.00254838	0.004783	0.00439231	0.00504732	0.00416352	0.00327511	0.00442421	0.00452933	0.00444018
	101	0.00737586	0.00707505	0.00734212	0.00879482	0.00680197	0.00636414	0.00614334	0.00653756	0.00465059	0.00616584	0.00415277	0.00522891	0.00728714	0.00672229	0.0062367	0.0068546	0.00417892	0.0044961	0.00428597	0.00451424	0.00489535	0.00468601	0.0060764	0.00479905	0.00580723	0.00558036	0.00596029	0.00616728	0.00750568	0.00768367	0.00744303	NA	0.00214673	0.00212834	0.00248641	0.00221306	0.0029285	0.0019974	0.00266508	0.00246874	0.00542335	0.00422594	0.00543892	0.0041375	0.00285146	0.00342285	0.00510944	0.00327968
	102	0.0187637	0.00908079	0.0070587	0.0106591	0.0111355	0.126843	0.164922	0.0433953	0.00930119	0.097411	0.256234	0.0323199	0.0112749	0.0319906	0.640211	0.0177039	0.0148296	0.0171872	0.776166	0.00909873	0.00406281	0.00332953	0.00523195	0.00367165	0.00376628	0.00441028	0.00473822	0.00466588	0.00915153	0.00773547	0.00635557	NA	0.00241036	0.00203966	0.00171825	0.00173524	0.00249091	0.00187634	0.00202864	0.00297311	0.00624665	0.005141	0.00506907	0.00556871	0.00327511	0.00344106	0.00519869	0.00413744
	103	0.00540073	0.00623703	0.00531764	0.00620682	0.00630828	0.00495929	0.0056314	0.00561877	0.00577245	0.00593287	0.00568384	0.00631728	0.00690736	0.00502179	0.00807225	0.00578783	0.00403099	0.00473526	0.00441162	0.00468989	0.0058278	0.00400777	0.00545224	0.00502758	0.0540956	0.0121148	0.408666	0.0118495	0.00530647	0.00806354	0.00825258	NA	0.00210907	0.0021106	0.00216297	0.00213761	0.00535209	0.00444875	0.00405728	0.00435348	0.0028881	0.00284502	0.00341564	0.00288844	0.00257446	0.00233045	0.00339142	0.00292648
	104	0.0110792	0.011169	0.0106893	0.0112512	0.00970927	0.0105618	0.0100683	0.0125451	0.00736344	0.00879059	0.00748757	0.00726369	0.00826034	0.00619088	0.00917776	0.00778519	0.00530685	0.00623396	0.00651971	0.00560327	0.00572789	0.00522551	0.00569089	0.00557604	0.00530225	0.101292	0.00668925	0.00789966	0.00679625	0.00524907	0.00660931	NA	0.00305062	0.00336987	0.00365886	0.00336988	0.00262556	0.00223951	0.00966587	0.00684877	0.00386822	0.0031445	0.00354618	0.00343491	0.0027374	0.00293127	0.00312368	0.00206872
	105	0.0234546	0.0218434	0.0220804	0.0245202	0.015853	0.0268445	0.0170269	0.0218743	0.0107086	0.0156398	0.00950104	0.0109547	0.0115835	0.013046	0.00961579	0.00916973	0.0115382	0.0139826	0.0111826	0.0133144	0.00807566	0.00792305	0.00860977	0.00892776	0.00850043	0.0105667	0.0119849	0.0128196	0.0060017	0.0045584	0.00420483	NA	0.00297529	0.00338761	0.00545796	0.00377226	0.0035344	0.00387374	0.00342084	0.0036633	0.00633813	0.00542384	0.00548243	0.00595904	0.0168481	0.00513427	0.00624735	0.00469247
	106	0.0118508	0.0114712	0.0125923	0.0151552	0.0565003	0.0461739	0.0293326	0.0644215	0.0673112	0.0282045	0.0267204	0.10905	0.0819625	0.0182272	0.0203579	0.146466	0.114181	0.0177931	0.0152592	0.135972	0.00561134	0.00428523	0.00495658	0.0158445	0.043975	0.0665503	0.0661421	0.0731065	0.0567253	0.0123111	0.0101496	NA	0.00259867	0.0027491	0.00240555	0.00289206	0.00299583	0.00311715	0.00282418	0.00376948	0.00446936	0.00324432	0.00335038	0.00340888	0.00400834	0.00298589	0.00348067	0.00307785
	107	0.00481437	0.00479455	0.00303672	0.0045619	0.00537575	0.00292818	0.00273038	0.00413457	0.0038347	0.00408468	0.00377525	0.0042825	0.00396402	0.00281645	0.00385883	0.00408552	0.00292154	0.00312495	0.00328079	0.00331981	0.00366319	0.00373031	0.00326767	0.00262043	0.0107307	0.0113767	0.00767549	0.233317	0.00214245	0.00214107	0.0024649	NA	0.00802199	0.00642049	0.00626655	0.00651343	0.00299583	0.00260267	0.00218775	0.00326511	0.00632506	0.00595624	0.00650495	0.00541258	0.00443199	0.00400546	0.00664897	0.00524749
	108	0.0243805	0.0139166	0.015791	0.0293673	0.772408	0.813087	0.772222	0.890734	0.969547	0.89734	0.71371	0.920028	0.964466	0.966442	0.350569	0.89128	0.946765	0.982143	0.219073	0.909452	0.0675858	0.00786139	0.00769188	0.00463146	0.010352	0.0100266	0.0109772	0.0113644	0.00559024	0.00545627	0.00402359	NA	0.00448177	0.00473555	0.00422487	0.00553264	0.00619362	0.00396453	0.00286396	0.0020971	0.00446936	0.00402629	0.00411182	0.00463192	0.00316105	0.00331361	0.00370379	0.00726576
	109	0.0133321	0.0113888	0.0133751	0.0137296	0.0129457	0.0126775	0.0100872	0.0162556	0.00499735	0.00343237	0.00375427	0.00875429	0.00716846	0.00425125	0.00492261	0.0106905	0.00588007	0.004241	0.00533304	0.00959056	0.00309706	0.00300583	0.0033411	0.00345836	0.00332443	0.0046263	0.00366622	0.00607489	0.00737798	0.00550807	0.00581185	NA	0.00222205	0.00218155	0.0023449	0.00216276	0.250337	0.0759919	0.00487271	0.0066364	0.00516198	0.00470843	0.00452518	0.00470998	0.00381281	0.00367774	0.00571186	0.00514658
	110	0.00768447	0.00630572	0.00711268	0.00743503	0.00614372	0.00819214	0.00690178	0.0111315	0.00597642	0.00639881	0.00629208	0.00984266	0.00759572	0.0060846	0.00652872	0.00903355	0.00671215	0.00542083	0.00487233	0.00851908	0.00442913	0.00430064	0.00587447	0.00388494	0.00229343	0.00248416	0.00212255	0.00240224	0.00638479	0.00538721	0.00798676	NA	0.00587526	0.00712994	0.00533668	0.00646313	0.00434226	0.00526587	0.00276452	0.00289347	0.00444322	0.00477498	0.00426411	0.00457987	0.0033077	0.00387802	0.00439546	0.00312831
	111	0.0083017	0.00726738	0.00674828	0.00875096	0.0162918	0.00885225	0.00822905	0.0107428	0.0114837	0.00778107	0.00809581	0.0367207	0.0077144	0.00544691	0.00646615	0.0851832	0.00591705	0.00535706	0.00547264	0.0825385	0.00514511	0.00396153	0.00521359	0.00559127	0.0196309	0.0141849	0.011063	0.162266	0.0060017	0.00490374	0.00576351	NA	0.0172868	0.00425668	0.00861145	0.00397344	0.00784301	0.00472112	0.00230708	0.00565422	0.00768417	0.00778637	0.00724464	0.00840511	0.010526	0.00604461	0.00792075	0.00575206
	112	0.0115113	0.010221	0.0107028	0.0117337	0.00921558	0.01349	0.0088358	0.0335713	0.00907682	0.00447295	0.00432056	0.169407	0.013791	0.00518121	0.00475575	0.310069	0.020044	0.00408157	0.00414637	0.543535	0.00496195	0.00448562	0.00655371	0.00396112	0.00467103	0.00561636	0.00643197	0.00625967	0.00922247	0.00783907	0.00940045	NA	0.00244803	0.00292647	0.00236512	0.00251484	0.00484718	0.00550797	0.958174	0.963818	0.0044955	0.00399301	0.0040248	0.00457987	0.00325882	0.00313154	0.00452933	0.00368333
	113	0.0153381	0.0120619	0.0139419	0.0164492	0.0110806	0.013033	0.010694	0.0143826	0.00924	0.0077966	0.00593553	0.00716905	0.0113461	0.00704113	0.00606983	0.00819374	0.0102254	0.00677604	0.00607296	0.00776378	0.00631067	0.00721398	0.00468122	0.00484475	0.00422917	0.00525634	0.00602461	0.00533574	0.00800227	0.00640594	0.00618641	NA	0.149857	0.00626086	0.00468981	0.0182326	0.0543961	0.0674273	0.00298329	0.0033182	0.00407731	0.00417603	0.0040248	0.00392932	0.00338917	0.00395084	0.0035476	0.00368333
	114	0.0104311	0.00653927	0.00712618	0.00772014	0.00597916	0.00714274	0.00553659	0.00636087	0.0084037	0.00715983	0.00645987	0.00764226	0.0104678	0.00579233	0.00759251	0.00737664	0.0131654	0.00620207	0.00689665	0.00776378	0.00519506	0.00522551	0.00655371	0.00670343	0.0209565	0.0100266	0.0359976	0.0169311	0.0397701	0.00676854	0.00543728	NA	0.00331425	0.00383101	0.00337585	0.00331959	0.00316413	0.00426717	0.00371917	0.00743277	0.00580233	0.00562349	0.00626564	0.00549065	0.00475787	0.00480655	0.00562262	0.00585297
	115	0.0111718	0.00787185	0.00749059	0.00914574	0.0131651	0.0438212	0.0171407	0.0366457	0.0219679	0.0763974	0.0141572	0.175654	0.0331363	0.0371453	0.0133703	0.318784	0.0600026	0.0266259	0.0130394	0.556024	0.00624407	0.00463976	0.0155306	0.00804412	0.00976287	0.164675	0.0302088	0.0163306	0.0110812	0.743693	0.0127957	NA	0.00440645	0.0203256	0.00452809	0.00460215	0.0112764	0.00599219	0.00282418	0.00597276	0.00780178	0.00740371	0.00791907	0.00731219	0.0194388	0.0225944	0.00729601	0.0057016
	116	0.00975218	0.00880603	0.0093936	0.0105055	0.00861218	0.00998629	0.00811528	0.00939996	0.0183372	0.015003	0.0160448	0.0140542	0.0147404	0.0155171	0.0161862	0.00921513	0.0153843	0.0163422	0.018875	0.00969595	0.00662704	0.00607331	0.0120243	0.0072976	0.00456583	0.00531034	0.00514558	0.00461968	0.00544835	0.00395407	0.00447065	NA	0.00482073	0.00604803	0.00539732	0.0997888	0.0136664	0.00360137	0.00330151	0.00488439	0.00755348	0.00660511	0.00637442	0.00629733	0.0611028	0.00662722	0.00941565	0.00509612
	117	0.00864118	0.00725364	0.00735562	0.00820265	0.00729567	0.00805674	0.00703451	0.00784508	0.0068739	0.00633668	0.0051595	0.00513427	0.0071922	0.00518121	0.00579867	0.0059694	0.00567667	0.00494252	0.00455123	0.0048831	0.00404616	0.00388445	0.00471793	0.00399159	0.00241968	0.00217814	0.00240127	0.00217125	0.00822928	0.00640594	0.0066214	NA	0.620443	0.985776	0.845236	0.839629	0.00592433	0.00578035	0.00455449	0.00806987	0.0087819	0.0112137	0.0095725	0.00962815	0.209884	0.0178607	0.0126286	0.0355215
	118	0.00438231	0.00450605	0.00419743	0.00449611	0.00334613	0.00352059	0.00343193	0.00356916	0.00336556	0.00410021	0.00283144	0.0038093	0.00296708	0.0031353	0.00331651	0.00374506	0.00262569	0.00328439	0.00305742	0.00284555	0.00293055	0.00282085	0.00271694	0.00249855	0.00119932	0.00144009	0.00147935	0.0014321	0.00166005	0.0013986	0.00165535	NA	0.00444411	0.00443404	0.00414401	0.00480334	0.142117	0.0141331	0.00270485	0.0220329	0.00577619	0.00637218	0.00543892	0.00559473	0.00511634	0.00546199	0.00575649	0.00423836
	119	0.0122211	0.00921817	0.00932612	0.00997916	0.0156884	0.0353921	0.0113576	0.0105308	0.0371436	0.0541569	0.0107175	0.0117118	0.0448859	0.024551	0.0145384	0.0107358	0.0416782	0.0163422	0.0144076	0.0116457	0.00912466	0.00767642	0.00736145	0.00778512	0.00559682	0.00516633	0.00505982	0.00524334	0.00398695	0.00319434	0.00753969	NA	0.00470774	0.00466461	0.00400251	0.00402374	0.00686684	0.00484218	0.00393795	0.00355711	0.00744894	0.00798602	0.00850647	0.00835307	0.00630581	0.00626309	0.00729601	0.00761895
	120	0.00459834	0.00530285	0.00561457	0.00453997	0.00389468	0.00412992	0.00817217	0.00491201	0.00356953	0.00368087	0.00631305	0.00406956	0.00384533	0.00374641	0.00525635	0.0042671	0.0026072	0.00363515	0.00337852	0.00335494	0.00311371	0.00309831	0.00345125	0.00300131	0.00410293	0.00369024	0.00313023	0.00411152	0.00347616	0.0024864	0.00346778	NA	0.00587526	0.00665106	0.144191	0.00709184	0.0126902	0.0147081	0.00666269	0.00995461	0.00768417	0.00818568	0.00685304	0.00741627	0.149498	0.00670005	0.00787612	0.00549977
	121	0.0096596	0.00898463	0.00925863	0.010023	0.00938014	0.0105787	0.0104285	0.0103541	0.0146861	0.0101573	0.011137	0.0102212	0.0181585	0.00911361	0.0129532	0.0105316	0.0312309	0.00955023	0.0108057	0.00918656	0.00800906	0.00750686	0.00837112	0.00732807	0.00378732	0.00442828	0.00426654	0.00415772	0.00437003	0.00288354	0.00410817	NA	0.00628955	0.00665106	0.00669106	0.00673976	0.0289148	0.00941198	0.00632458	0.00703459	0.0104285	0.0097496	0.0101817	0.0104088	0.0640031	0.0116158	0.014949	0.00973813
	122	0.0109249	0.00796802	0.00858381	0.0101985	0.00987383	0.00900459	0.0174061	0.0104248	0.00915841	0.00495442	0.0179744	0.00586774	0.00761945	0.00478265	0.0159151	0.00619638	0.0072299	0.00487875	0.0104148	0.00595458	0.00551143	0.00533342	0.00684743	0.00580456	0.0067751	0.00801051	0.00857596	0.00796896	0.0207577	0.0154709	0.0140523	NA	0.00542332	0.00455819	0.00545796	0.00440097	0.00915578	0.00617377	0.0033214	0.00299965	0.00496596	0.00618917	0.00476449	0.00551667	0.00513263	0.00486117	0.00564493	0.00494475
	123	0.013579	0.011746	0.0100684	0.0132909	0.0178278	0.0170613	0.0109784	0.0157608	0.0294334	0.0170221	0.0108433	0.0184313	0.0272259	0.0115049	0.012244	0.0144809	0.0248886	0.0108576	0.00963297	0.013086	0.00910801	0.00749144	0.00923393	0.00886681	0.00353483	0.00333021	0.00347326	0.00485067	0.0187855	0.016576	0.0130011	NA	0.00610124	0.00984357	0.00683256	0.107434	0.0249091	0.01722	0.00475338	0.00639749	0.012062	0.0100657	0.0112694	0.00978428	0.0539823	0.0255621	0.0786497	0.0365306
	124	0.00669691	0.00789933	0.00740961	0.00712797	0.00795392	0.00617796	0.00695867	0.00770372	0.00785298	0.00844891	0.00696323	0.00735833	0.0081654	0.00624402	0.00832256	0.00803486	0.00599101	0.0059948	0.00643594	0.00605997	0.00657709	0.0062737	0.00701265	0.00572839	0.00279841	0.00295219	0.00325887	0.0029335	0.00363224	0.00302167	0.00329862	NA	0.0061389	0.00622539	0.00616548	0.00794689	0.00454423	0.00432769	0.00344073	0.00602586	0.00691313	0.00753681	0.00728815	0.00710401	0.00628951	0.00659081	0.00731832	0.00711439
	125	0.0165417	0.0143562	0.0153996	0.0183573	0.0206253	0.0416716	0.0318354	0.0332886	0.0179089	0.0233432	0.0274125	0.0213652	0.0252795	0.0163142	0.0241959	0.018226	0.0364453	0.0146841	0.0188332	0.017407	0.00764274	0.00599624	0.00789382	0.00546939	0.00441854	0.00460829	0.0044595	0.00468898	0.00485244	0.00448934	0.00488147	NA	0.00779602	0.00808769	0.00683256	0.0100091	0.00471254	0.00317768	0.00322196	0.589233	0.0128984	0.0138757	0.0128141	0.0124385	0.00995568	0.0116887	0.0132533	0.0119078
	126	0.017591	0.0159498	0.0183823	0.0198706	0.0145365	0.0158088	0.0144672	0.0191533	0.0269653	0.00396043	0.00358648	0.00641192	0.0305965	0.00390583	0.00492261	0.00633256	0.0181395	0.00353948	0.00396487	0.00403998	0.00406281	0.00368406	0.00374497	0.00341266	0.811455	0.893307	0.413297	0.995427	0.641104	0.208029	0.00555811	NA	0.00700512	0.00780391	0.00667084	0.00761996	0.023428	0.017341	0.00616547	0.00645059	0.0140223	0.01331	0.0145981	0.0145463	0.0130678	0.0114156	0.0142127	0.0143801
	127	0.011357	0.0115811	0.01185	0.0124356	0.00981898	0.010054	0.0102579	0.0116263	0.00577245	0.00678708	0.00593553	0.00596238	0.00643262	0.00637687	0.00700847	0.00637796	0.0054178	0.00570782	0.00516551	0.00576136	0.00486205	0.00536424	0.00603969	0.00513422	0.00723799	0.0078305	0.00846876	0.00813064	0.00940692	0.00707934	0.0073222	NA	0.0201491	0.0218687	0.0193657	0.0209989	0.00531843	0.00553824	0.00274463	0.00307929	0.00325401	0.00312786	0.00317633	0.00351297	0.00280258	0.00318616	0.00319061	0.00247237
	128	0.0154615	0.0112102	0.011634	0.0144753	0.012452	0.0198202	0.010201	0.0237826	0.0175009	0.0136518	0.00891378	0.0128712	0.0215291	0.0121161	0.00997038	0.00994144	0.0308796	0.0126433	0.00858591	0.00853665	0.00872504	0.0146746	0.00901364	0.00871446	0.0050708	0.0046983	0.00460958	0.00512785	0.00681044	0.00457567	0.00433774	NA	0.00862459	0.00890355	0.007439	0.0105623	0.0049145	0.00469086	0.0117343	0.0165379	0.0101149	0.0106647	0.00944197	0.0103047	0.0101023	0.00857533	0.00983958	0.00882991
	129	0.00901151	0.0105645	0.00847583	0.00877289	0.00828305	0.00788748	0.00824801	0.00855184	0.0101375	0.0116173	0.0110111	0.0110967	0.0115597	0.00985758	0.0116599	0.0109628	0.00848727	0.0101083	0.00926999	0.00897578	0.00929117	0.00816968	0.00939915	0.00975045	0.00511288	0.00549035	0.00581021	0.00639826	0.00798808	0.00678581	0.0053527	NA	0.00553631	0.00571104	0.00739857	0.00689065	0.00595799	0.00450928	0.00538982	0.00477821	0.00750121	0.0080193	0.00844121	0.00840511	0.00726716	0.00695494	0.00816618	0.00852717
	130	0.00972132	0.010276	0.00924514	0.0105494	0.00992869	0.0098001	0.0107129	0.00901124	0.0200914	0.0106077	0.0113887	0.0100083	0.0258967	0.0122223	0.0121397	0.0108039	0.0307872	0.010475	0.0113781	0.011189	0.00889155	0.00830841	0.00910543	0.00752613	0.00359795	0.00351022	0.0036019	0.00364955	0.17859	0.0574635	0.984667	NA	0.00644019	0.00783938	0.00683256	0.00912886	0.0109398	0.0085646	0.00741846	0.0140161	0.0133035	0.0140754	0.0145546	0.0134794	0.0137522	0.0122531	0.0129856	0.0161966
	131	0.0250285	0.0145348	0.0146438	0.0178748	0.021887	0.0196171	0.0173493	0.0240653	0.0241912	0.0164008	0.0161287	0.0195434	0.0267037	0.0129663	0.0150181	0.0168187	0.0252029	0.0125157	0.0133884	0.0171611	0.0111727	0.0101582	0.0111799	0.0106341	0.0125192	0.0131408	0.0171734	0.0170466	0.206796	0.991539	0.98712	NA	0.0325399	0.0136391	0.149952	0.0245448	0.00952605	0.0078988	0.00441527	0.00594622	0.0137609	0.0147409	0.0142935	0.0142601	0.0131004	0.0125262	0.014302	0.0135224
	132	0.00876462	0.0106881	0.0103249	0.0154842	0.00855732	0.00893688	0.00932878	0.00957665	0.0102395	0.0109028	0.0108643	0.0114516	0.0112512	0.00951217	0.0108464	0.00991874	0.00876463	0.00926325	0.00992615	0.00925682	0.00924122	0.00900207	0.00871992	0.00927816	0.00433438	0.00428427	0.00426654	0.00561292	0.00302213	0.0024864	0.00277905	NA	0.00813498	0.00925827	0.00667084	0.00759481	0.0076747	0.00602246	0.00721957	0.0156619	0.00759269	0.0070876	0.00796258	0.00824898	0.00736492	0.00600819	0.00812156	0.00771986
	133	0.0108632	0.0118284	0.0122819	0.0117995	0.0119035	0.0105956	0.0112628	0.0104601	0.0126056	0.0137295	0.0133602	0.0140778	0.0123905	0.0118238	0.0141838	0.0136184	0.0155138	0.0122766	0.0145472	0.010785	0.0120552	0.0111601	0.0107943	0.0120814	0.0086898	0.0110887	0.0110416	0.0102557	0.0135358	0.0103082	0.0104637	NA	0.00964146	0.0114221	0.0145141	0.00993361	0.00356806	0.00287504	0.00435561	0.00520294	0.0203996	0.0204808	0.0207549	0.0226392	0.0277651	0.0178971	0.0209509	0.0203845
	134	0.0189489	0.0201261	0.0210411	0.0214936	0.0182666	0.0263198	0.017463	0.0214503	0.0113205	0.0140556	0.0113048	0.0120904	0.0116784	0.0129397	0.0128906	0.0118253	0.0107986	0.010746	0.0116294	0.011066	0.0107731	0.0102198	0.0119142	0.0100552	0.00498664	0.0062464	0.481412	0.00676784	0.00801646	0.00668221	0.10407	NA	0.00636487	0.00744919	0.481251	0.00958153	0.0377003	0.0511152	0.00964598	0.0072735	0.0101671	0.00984943	0.0108778	0.0104869	0.010363	0.00853892	0.0101743	0.00933448
	135	0.0191649	0.017406	0.017613	0.0188398	0.0178278	0.016215	0.0151308	0.0173864	0.0135846	0.0154534	0.0145137	0.0157814	0.015595	0.0151185	0.0162905	0.0153888	0.0136462	0.0147	0.0162085	0.0143331	0.0155186	0.0155224	0.0153103	0.0142143	0.00685926	0.00851454	0.00904764	0.00886979	0.0114075	0.00968661	0.0104517	NA	0.00783368	0.00783938	0.00776244	0.00872649	0.00727077	0.00635536	0.0114757	0.0169627	0.0117745	0.0129607	0.0116393	0.0133493	0.0284495	0.0122167	0.0116692	0.0120591
	136	0.0103385	0.00927312	0.0106218	0.0100011	0.00976413	0.00978318	0.00858931	0.00982402	0.00834251	0.00877506	0.00924936	0.0103159	0.00980322	0.00868849	0.00930291	0.00966907	0.00893105	0.00916758	0.00892097	0.00902847	0.00829212	0.00798471	0.0080774	0.00802889	0.00462895	0.00543635	0.00484542	0.00531264	0.00296538	0.0029008	0.00280322	NA	0.00730642	0.0081409	0.00691342	0.00751936	0.0173354	0.0168871	0.00322196	0.0051764	0.00974896	0.00994926	0.0112477	0.0100185	0.00857068	0.00979518	0.0101966	0.00888037
	137	0.0170046	0.0171999	0.0173296	0.0201557	0.018486	0.0164858	0.0171028	0.0180578	0.0166442	0.0166493	0.0169257	0.0179108	0.0178262	0.0147465	0.0183138	0.018521	0.0156802	0.0162466	0.0161666	0.0164761	0.0164344	0.0157382	0.0153287	0.0159359	0.010352	0.0121328	0.0113203	0.013605	0.00781782	0.00752827	0.00789009	NA	0.127034	0.0179845	0.0215286	0.12026	0.00932409	0.007233	0.011973	0.0136179	0.00807621	0.00820231	0.00796258	0.008275	0.0077071	0.00699135	0.0083893	0.00928402
	138	0.0183008	0.0165817	0.0179099	0.0189275	0.0141525	0.0164689	0.0152636	0.0153014	0.0106882	0.0108096	0.0117242	0.0120904	0.0119633	0.0118238	0.0118894	0.0123701	0.0103918	0.0107619	0.0113083	0.0123307	0.0100405	0.0176034	0.0103354	0.00894299	0.00618596	0.0063184	0.00722525	0.00676784	0.0113649	0.00863334	0.00820425	NA	0.00723109	0.00752013	0.140209	0.0076954	0.0351757	0.0796235	0.00618536	0.00822914	0.0178252	0.0157724	0.015142	0.0172526	0.752754	0.220155	0.0777349	0.0942025
	139	0.0179922	0.0177082	0.0187197	0.0215813	0.0167307	0.0176876	0.0153394	0.0162909	0.0182148	0.0210136	0.0166321	0.0182184	0.0192029	0.0184929	0.0175629	0.0167733	0.0173074	0.017825	0.0168926	0.0182853	0.0143697	0.0150754	0.0160446	0.0144886	0.00978391	0.0101526	0.0106128	0.0107408	0.0091941	0.00951394	0.00807134	NA	0.00862459	0.00879713	0.00859124	0.00958153	0.00791033	0.00693036	0.00928799	0.00939715	0.0188968	0.0190334	0.0198629	0.0192823	0.157596	0.0165316	0.0209509	0.0190222
	140	0.023146	0.0229149	0.0255625	0.0262529	0.018486	0.0234932	0.0207622	0.024454	0.00805695	0.00807616	0.00744563	0.00854135	0.00840276	0.0077851	0.008552	0.00869309	0.0072299	0.00876899	0.00801351	0.00799213	0.0068768	0.00763018	0.00717787	0.00641397	0.0100574	0.0110527	0.0115775	0.00995542	0.0124007	0.0106708	0.00906213	NA	0.00644019	0.00766202	0.00863167	0.00799718	0.00821328	0.00647641	0.0108592	0.0113881	0.0188968	0.0177523	0.0187099	0.0191522	0.0146158	0.0162221	0.0188536	0.015692
	141	0.0079005	0.00776195	0.00817891	0.0110977	0.0077345	0.00785362	0.00752749	0.00752703	0.0101579	0.010499	0.0102141	0.0099373	0.0106103	0.00953874	0.00994952	0.0102365	0.0112239	0.01132	0.0114479	0.00934465	0.00822552	0.00867836	0.00849962	0.00865352	0.00624908	0.00666043	0.00709661	0.00840783	0.00593076	0.00656134	0.00635557	NA	0.00719343	0.00698805	0.00626655	0.00684036	0.0198936	0.016766	0.00620525	0.00684877	0.0102194	0.0104484	0.0110519	0.0110073	0.0102653	0.0106327	0.0111114	0.0105959
	142	0.00999907	0.0106881	0.0114586	0.0121943	0.010203	0.00941081	0.00989761	0.00939996	0.00968874	0.00868188	0.00906059	0.0104815	0.00873508	0.00810394	0.00834341	0.0094648	0.00954124	0.010172	0.00889305	0.0122078	0.0100405	0.00906372	0.00939915	0.00926293	0.00706967	0.00865855	0.00846876	0.00796896	0.00655505	0.00740741	0.00721346	NA	0.00768304	0.00734277	0.00822737	0.00782114	0.00326511	0.00251188	0.0120923	0.0148655	0.0163485	0.0158889	0.0164908	0.0176169	0.0151372	0.017624	0.0158861	0.0199808
	143	0.0304293	0.0281353	0.0316899	0.0330519	0.0274273	0.0278093	0.0267539	0.0317337	0.0154408	0.0150186	0.0155834	0.0159707	0.0162121	0.0157562	0.0145175	0.0160243	0.0146817	0.0160233	0.0148124	0.014421	0.0136204	0.0148442	0.0146678	0.0147476	0.0154439	0.0186132	0.0204965	0.020188	0.0193814	0.0180437	0.0159373	NA	0.00606357	0.00617218	0.00628677	0.00681521	0.188198	0.0286596	0.00940732	0.00955642	0.0154206	0.0150903	0.017361	0.0164719	0.0131004	0.0136186	0.0156407	0.0164489
	144	0.0228991	0.0222692	0.0234435	0.0264941	0.0171695	0.021242	0.0191126	0.0240653	0.00738384	0.00742386	0.00702615	0.00828108	0.00802298	0.00839622	0.0079471	0.00785328	0.00730386	0.00747756	0.00698041	0.00706118	0.00674359	0.00726023	0.00793053	0.00743472	0.0132135	0.0169571	0.018181	0.0173931	0.0231413	0.0189934	0.0187163	NA	0.00568695	0.00594161	0.00624634	0.00656373	0.0340312	0.0200042	0.00793556	0.0106979	0.00829838	0.00910074	0.00891983	0.00892555	0.00712051	0.00881202	0.0087686	0.0128664
	145	0.0149677	0.0139303	0.0150352	0.0160983	0.0147559	0.0142855	0.0143345	0.0156902	0.00936238	0.009241	0.00939617	0.00962972	0.00956586	0.0100701	0.00990781	0.00914703	0.00939332	0.0089922	0.0100378	0.00978377	0.00867509	0.0100194	0.00967452	0.00935434	0.0110253	0.0120248	0.0144291	0.012427	0.0099319	0.00792541	0.00751553	NA	0.00843628	0.00792806	0.00796458	0.00822352	0.178874	0.0576824	0.00527049	0.00528258	0.0116961	0.0121454	0.0125313	0.0125686	0.012025	0.0117251	0.0631875	0.0115041
	146	0.0172824	0.0100425	0.0104598	0.0109661	0.0106967	0.00952929	0.00822905	0.0114496	0.0091992	0.00917887	0.00876696	0.0103632	0.00821287	0.0085025	0.00888574	0.00980526	0.00880161	0.00918353	0.00920018	0.0105918	0.0088749	0.00952616	0.00879335	0.00927816	0.00547057	0.00541835	0.00540286	0.00577461	0.00388763	0.0038332	0.00427733	NA	0.0058376	0.00578199	0.00630698	0.00666432	0.00834792	0.00662773	0.00578759	0.00586658	0.00926543	0.00843524	0.00955075	0.00994041	0.00842404	0.00870278	0.00896941	0.00999041
	147	0.00506126	0.00571499	0.00596548	0.00620682	0.0047175	0.00573789	0.00517634	0.00597215	0.00489536	0.0048457	0.00518048	0.00643558	0.00481853	0.00528749	0.0048809	0.00487993	0.00599101	0.00503818	0.00635218	0.00613023	0.00537822	0.00579585	0.00574597	0.00554557	0.00616492	0.00709245	0.00681789	0.0278798	0.00490919	0.004144	0.00374568	NA	0.00621422	0.00484197	0.00553882	0.00485364	0.00794399	0.00880671	0.00552904	0.0191394	0.014166	0.0136095	0.0124007	0.0144422	0.0112266	0.0122349	0.0153953	0.013371
	148	0.0163565	0.0136418	0.0136045	0.0147165	0.0146462	0.0143701	0.0119644	0.0135345	0.00928079	0.00837126	0.00910254	0.00932213	0.00892497	0.0106016	0.00953235	0.0101911	0.00887558	0.0091357	0.0101495	0.00967838	0.0101903	0.00898665	0.00947258	0.00888205	0.0064174	0.0077405	0.00941212	0.00836163	0.00947787	0.00813261	0.00761219	NA	0.00907653	0.00849562	0.0100669	0.0105623	0.00797765	0.00696063	0.0112967	0.0087866	0.00967055	0.00933367	0.0101599	0.0104348	0.00780486	0.00855712	0.00946027	0.0129169
	149	0.00370684	0.00344828	0.00312425	0.00350422	0.00273796	0.00238627	0.00268266	0.00194375	0.00330402	0.00375906	0.00355004	0.00402321	0.00347147	0.003462	0.00315778	0.00324879	0.00286562	0.00295978	0.00257455	0.00292404	0.00281905	0.00316006	0.00313731	0.00273792	0.17038	0.00204955	0.00174524	0.00300959	0.00327415	0.00425499	0.00604084	NA	0.00392394	0.00556079	0.00487231	0.0114088	0.163177	0.13638	0.00166361	0.00139727	0.00363743	0.002925	0.00367425	0.00297219	0.39539	0.182273	0.0066907	0.0128221
	150	0.00310246	0.00342215	0.00257805	0.00253849	0.00306007	0.00241648	0.00204926	0.00291563	0.00278521	0.00352183	0.00284545	0.00333899	0.00301343	0.00281906	0.00388851	0.00265268	0.00231979	0.00285822	0.00303665	0.00246022	0.00251429	0.00260062	0.0028922	0.0026318	0.00413716	0.00412137	0.00403067	0.00496932	0.00204005	0.00261042	0.00218378	NA	0.00359694	0.00421216	0.00517682	0.00426227	0.105237	0.0747156	0.00249541	0.00258644	0.0034912	0.0038844	0.00375299	0.00305793	0.00322323	0.0034974	0.00282568	0.0034521
	151	0.00519763	0.00423197	0.00432588	0.00507698	0.00375799	0.00359451	0.00346511	0.00376602	0.00371361	0.00417876	0.00433593	0.003859	0.00412237	0.00365983	0.00456704	0.00399392	0.00293385	0.00291626	0.00381232	0.00308536	0.00361905	0.00302398	0.016046	0.00273792	0.00990532	0.00853235	0.027529	0.00944871	0.00473492	0.0043333	0.00674986	NA	0.735914	0.209112	0.00550164	0.00999872	0.00304489	0.00286432	0.0291824	0.00624313	0.00352776	0.003276	0.00349054	0.00334372	0.272952	0.0087052	0.172432	0.0214523
	152	0.00705105	0.0065047	0.00696948	0.00731196	0.00595909	0.00510481	0.00551436	0.00625645	0.00469663	0.00516414	0.00420043	0.00465269	0.00542417	0.00467371	0.00422778	0.00464964	0.00382083	0.00457025	0.00364729	0.00405332	0.004	0.00306934	0.00359483	0.00367179	0.00286419	0.00365354	0.00436309	0.00347619	0.00188893	0.00263653	0.00246739	NA	0.00314418	0.00339929	0.00377604	0.00461479	0.00243591	0.00202664	0.00998163	0.0066296	0.00248588	0.0028782	0.00238826	0.00208625	0.00195616	0.00257837	0.0021761	0.00382197
	153	0.00886418	0.00600836	0.00727535	0.0086088	0.00563698	0.00646409	0.00540259	0.00698536	0.00204795	0.00211675	0.00181567	0.00128633	0.00238663	0.00222557	0.00213999	0.00250365	0.00170573	0.00181359	0.00249204	0.00181492	0.00217143	0.00164807	0.0019118	0.00157059	0.00775718	0.00949029	0.0100143	0.00935539	0.010578	0.00448992	0.00856495	NA	0.00236442	0.00278963	0.00261886	0.00246763	0.00643777	0.00405329	0.00197553	0.00145673	0.00588569	0.0040248	0.00467155	0.00440113	0.00435691	0.00308894	0.00383254	0.00332881
	154	0.0191789	0.0185737	0.0202312	0.0209977	0.0156762	0.0167341	0.0151272	0.0228391	0.00415051	0.00341235	0.00300805	0.00580218	0.00513488	0.00415441	0.00383632	0.00485828	0.00446901	0.00329348	0.00445596	0.00556575	0.00247619	0.00254014	0.00266344	0.00229221	0.0403373	0.0133889	0.0110739	0.0275296	0.0137766	0.010259	0.0171299	NA	0.00238958	0.00485876	0.00304519	0.00320472	0.0472683	0.109358	0.00374311	0.00451883	0.00376538	0.0030654	0.00349054	0.00260067	0.00202285	0.00311447	0.00298808	0.0023425
	155	0.0126113	0.00606061	0.0077997	0.00880194	0.00901917	0.0166133	0.00741458	0.0127559	0.0117416	0.00985383	0.0055825	0.00946959	0.01121	0.00637998	0.00584582	0.00724271	0.0133047	0.00533921	0.00595778	0.00693702	0.00647619	0.00827059	0.0125165	0.00498769	0.00485321	0.00594814	0.00558891	0.00830553	0.0348823	0.00344576	0.00652297	NA	0.00249019	0.00271573	0.00267977	0.00298039	0.00316089	0.0022158	0.00956573	0.00686744	0.00464275	0.004095	0.00430412	0.00402961	0.00284533	0.00487593	0.00954886	0.00382197
	156	0.00688988	0.00525078	0.00528719	0.00626345	0.0190047	0.0213254	0.0116249	0.0164612	0.0546393	0.0165325	0.0139021	0.0121517	0.084159	0.0131803	0.0118221	0.0138297	0.0881179	0.0135076	0.00996815	0.0174031	0.00424762	0.00417309	0.00526152	0.00407505	0.00377914	0.0045892	0.00552658	0.004876	0.0019393	0.00146184	0.00212706	NA	0.00178589	0.0022354	0.00211133	0.00153826	0.0028709	0.00194558	0.00367379	0.0023486	0.00339981	0.0026208	0.00278193	0.00265783	0.002134	0.00237414	0.00269577	0.00406855
	157	0.00588259	0.0045977	0.00493762	0.00615308	0.0048317	0.00456111	0.00339059	0.00449493	0.004997	0.00625901	0.0060161	0.00593902	0.00530363	0.00425332	0.00472363	0.00575244	0.00463958	0.00423655	0.00496757	0.0058884	0.00386667	0.00305422	0.00377457	0.00367179	0.00700135	0.00677241	0.00887162	0.00723234	0.0280569	0.00315861	0.00754396	NA	0.00296811	0.00319607	0.00221284	0.00272401	0.00185593	0.00199962	0.00939244	0.00879983	0.00252244	0.0024102	0.00230953	0.00225772	0.00171164	0.00191463	0.00227354	0.0023425
	158	0.00382771	0.00350052	0.00369229	0.00424921	0.0040801	0.00395699	0.00320429	0.00467715	0.00439626	0.00437948	0.00420043	0.00758115	0.00515899	0.0036351	0.00365364	0.0072129	0.00532187	0.00375776	0.0041589	0.00963923	0.00270476	0.00317518	0.00284318	0.00241956	0.00274485	0.00421048	0.00268019	0.00314957	0.00231709	0.00221886	0.00269427	NA	0.00266626	0.00330691	0.0032076	0.00451865	0.00803271	0.00878212	0.00530274	0.00695663	0.00294284	0.0023166	0.00225704	0.00251493	0.00148935	0.00160829	0.00230602	0.0023425
	159	0.0112817	0.00969175	0.0108147	0.0114508	0.00912654	0.0100888	0.00804799	0.011784	0.0050243	0.00560209	0.00439012	0.00492638	0.005834	0.00531665	0.00516728	0.00575244	0.00494661	0.00484592	0.00574324	0.00629172	0.00384762	0.00424869	0.00452622	0.00836234	0.00393826	0.00383176	0.00432154	0.00599585	0.00768165	0.00553409	0.00521838	NA	0.00505584	0.00469249	0.00493321	0.00435842	0.0128755	0.0215365	0.00609989	0.0064215	0.00160851	0.0013338	0.00144346	0.00151468	0.00144489	0.00130195	0.00168891	0.00172605
	160	0.00967001	0.00924765	0.00862992	0.0114784	0.0237827	0.0219296	0.0142703	0.0204094	0.0177216	0.0172625	0.0144441	0.012097	0.0210217	0.0126116	0.0128138	0.011326	0.0236755	0.0118101	0.0110904	0.010466	0.00782857	0.00624452	0.00633997	0.00577299	0.00338134	0.00336393	0.00396834	0.00382614	0.00770684	0.0143573	0.00570051	NA	0.00196197	0.00197676	0.00747087	0.00182669	0.00426285	0.00291837	0.00745156	0.00511342	0.00294284	0.0027378	0.0027032	0.00274356	0.00217846	0.00227203	0.00224106	0.00221921
	161	0.00676901	0.00498955	0.00548382	0.00637382	0.00472432	0.00688697	0.00834606	0.00826095	0.00420512	0.00614952	0.0124387	0.00536428	0.00491791	0.00571231	0.00942116	0.00506691	0.00654999	0.00600662	0.00772366	0.00673536	0.00586667	0.00464181	0.00673214	0.00392648	0.00250617	0.00298521	0.00243087	0.00431608	0.0029971	0.00281925	0.00331821	NA	0.00309387	0.00280811	0.00249706	0.00269196	0.00374087	0.0025941	0.00332721	0.00309183	0.00700068	0.00577981	0.00616749	0.00600154	0.00544614	0.00492699	0.00789243	0.00616447
	162	0.00402917	0.00412748	0.00417295	0.00460791	0.00375799	0.00712862	0.00312977	0.00291563	0.00360439	0.0286126	0.00409203	0.00451585	0.00503845	0.0490615	0.00422778	0.00435158	0.00402552	0.0550316	0.00396085	0.00389199	0.0036	0.00391605	0.00387261	0.00348077	0.00513167	0.00521297	0.00689784	0.00683573	0.00355119	0.00318471	0.00380034	NA	0.00299326	0.00277116	0.0032685	0.00317267	0.0121796	0.00832275	0.00298063	0.00219996	0.00206547	0.0018252	0.00225704	0.00180046	0.00217846	0.00201675	0.00194875	0.00184934
	163	0.0173254	0.0157001	0.0174783	0.017797	0.0132603	0.0141666	0.012221	0.0159145	0.00316749	0.0029379	0.00289965	0.0029832	0.00354379	0.00284379	0.00323608	0.00327859	0.00276328	0.00255354	0.00414239	0.0029442	0.00217143	0.0023587	0.00261442	0.00222854	0.00708091	0.00746302	0.00781201	0.00753564	0.00450825	0.00336744	0.00371526	NA	0.00176074	0.00169964	0.0016241	0.00147417	0.0026679	0.00199962	0.00298063	0.00222969	0.00371054	0.0034632	0.00325434	0.00402961	0.00284533	0.00237414	0.00324791	0.00308223
	164	0.0108385	0.00922153	0.0101811	0.0123062	0.0099855	0.0104513	0.00763814	0.0110551	0.00423243	0.00744512	0.00428173	0.00418742	0.00554471	0.00956997	0.00461924	0.00456022	0.0037526	0.00935813	0.00496757	0.00320636	0.00327619	0.00317518	0.00395431	0.00297139	0.00747872	0.00933434	0.0105961	0.00989198	0.00740461	0.00355017	0.00300624	NA	0.00344602	0.00308522	0.0031467	0.00326881	0.00333488	0.00318859	0.00703566	0.0161727	0.00626954	0.0047736	0.00496024	0.00574433	0.00435691	0.00423772	0.00558641	0.00530144
	165	0.00467384	0.00488506	0.0041074	0.00935379	0.00391904	0.00537667	0.0036514	0.00467715	0.00425973	0.00755461	0.00463402	0.00498112	0.00506256	0.00576176	0.00527167	0.00548419	0.00525364	0.00600662	0.00549568	0.00516244	0.00386667	0.00411261	0.00416673	0.00345955	0.0075185	0.00761896	0.00756269	0.00909876	0.00604458	0.0143051	0.00612592	NA	0.0025405	0.00282658	0.00253766	0.00259582	0.0083517	0.00305348	0.00578796	0.00576746	0.00310735	0.0029952	0.00356927	0.00265783	0.00208954	0.00245073	0.00363766	0.0023425
	166	0.00668842	0.00512017	0.00583339	0.0067877	0.00595909	0.00513502	0.00555162	0.00668165	0.0102124	0.00324812	0.00382103	0.00366741	0.0151877	0.003462	0.00420168	0.00372567	0.014294	0.00380129	0.0032677	0.00358951	0.00318095	0.00308446	0.00290854	0.00273792	0.00676267	0.0101363	0.269743	0.00970534	0.00654829	0.202308	0.0083097	NA	0.00520676	0.00493266	0.00499411	0.00596077	0.0305649	0.0331559	0.00696635	0.00541071	0.00376538	0.0033696	0.00330683	0.00348661	0.00300093	0.00247626	0.00363766	0.00480829
	167	0.0115234	0.00982236	0.0102904	0.0102919	0.00794546	0.00975654	0.00879317	0.00935431	0.00633499	0.00618602	0.00625999	0.00722535	0.0071358	0.00680037	0.00555875	0.00637835	0.00781223	0.00689165	0.00597429	0.00675553	0.00565714	0.00503493	0.00586611	0.00469055	0.00708091	0.00766352	0.00939104	0.00809556	0.00221635	0.00214055	0.00266591	NA	0.00211289	0.00210608	0.00203013	0.00150622	0.00434984	0.00381009	0.00644647	0.00490531	0.00180957	0.002457	0.00199459	0.00180046	0.00177833	0.00181252	0.00198123	0.00147947
	168	0.00475442	0.00446708	0.00377969	0.00342144	0.00327482	0.00459131	0.00350237	0.00492012	0.0022664	0.00222624	0.00189697	0.00158739	0.00257949	0.00249759	0.00237486	0.00232482	0.00177396	0.0021618	0.00273959	0.00173426	0.00173333	0.00164807	0.0020752	0.00216487	0.00135253	0.00204955	0.00180757	0.00163311	0.00319859	0.00292367	0.00348837	NA	0.00274172	0.00273421	0.00233465	0.00288425	0.00420485	0.00316156	0.00519877	0.00445938	0.0049352	0.0044694	0.0046453	0.00388671	0.00220068	0.00370162	0.00331287	0.00369868
	169	0.00346509	0.00321317	0.00292762	0.00546327	0.00198636	0.0025071	0.00238459	0.00279414	0.00185681	0.00237222	0.00222216	0.00287372	0.00250717	0.00274487	0.00320998	0.00271229	0.00242213	0.00210377	0.00298714	0.00231906	0.00308571	0.00246454	0.00299024	0.00275915	0.00258573	0.00298521	0.00245164	0.00249633	0.00272006	0.00284536	0.00357345	NA	0.0102878	0.00445233	0.00403995	0.00429432	0.00321888	0.00313454	0.00377777	0.00606475	0.00625126	0.0048672	0.00475028	0.00425824	0.00275641	0.00377821	0.00516418	0.00431513
	170	0.00668842	0.00603448	0.00611741	0.0075327	0.00719386	0.00622244	0.00480644	0.00722833	0.00507891	0.00474444	0.00441722	0.00468006	0.00549649	0.00506936	0.00613289	0.00494769	0.00607239	0.00480239	0.00607331	0.00433564	0.00371429	0.00352294	0.00362751	0.00337465	0.0040576	0.00503475	0.0180341	0.00496932	0.00564161	0.00501201	0.0054169	NA	0.0018362	0.00254947	0.00223314	0.00333291	0.00350887	0.00272921	0.00738225	0.00564854	0.00356431	0.0025272	0.00304438	0.00320082	0.00546837	0.00191463	0.00328039	0.00221921
	171	0.00447238	0.00378788	0.00299316	0.003587	0.00359693	0.00428925	0.00260814	0.0090506	0.00382284	0.00372256	0.00284545	0.00686956	0.00467684	0.00338782	0.00326217	0.00512652	0.00583359	0.00323545	0.0032512	0.00459779	0.00318095	0.00255526	0.00228762	0.00199508	0.00214814	0.00191588	0.00191145	0.00233301	0.00234227	0.00208834	0.00286444	NA	0.00789818	0.00437843	0.00416176	0.003397	0.00620578	0.00554662	0.00637715	0.00535125	0.00552012	0.0049608	0.0054064	0.00517276	0.00260081	0.00365057	0.00574881	0.00357539
	172	0.00257867	0.00321317	0.00325534	0.00314552	0.00252322	0.00292998	0.00257089	0.00321934	0.00349517	0.00397803	0.00308935	0.00358531	0.00392951	0.00318999	0.00367973	0.00381509	0.00283151	0.00284371	0.00376281	0.00326685	0.00287619	0.00210167	0.0025654	0.00248323	0.00155144	0.00182677	0.00494484	0.0017031	0.00241783	0.00164457	0.00198525	NA	0.0159724	0.00602265	0.0080596	0.00967825	0.00426285	0.00374397	0.00460957	0.00359723	0.00235793	0.0019188	0.00220455	0.00248635	0.00173387	0.00214439	0.00194875	0.00221921
	173	0.0135783	0.0105016	0.0115357	0.0128856	0.00987813	0.010119	0.00912851	0.0112373	0.008656	0.00600354	0.00631419	0.00615797	0.00805188	0.00684982	0.00608069	0.00599088	0.00733463	0.00607916	0.00638688	0.00713868	0.00544762	0.00424869	0.00606219	0.00519993	0.00294375	0.00262876	0.00251397	0.00235634	0.00705201	0.00519474	0.00516166	NA	0.00485461	0.00465555	0.0047505	0.00519164	0.00606078	0.00565755	0.00499082	0.00419181	0.00387505	0.0033228	0.00385796	0.00314367	0.00253412	0.00199122	0.00285816	0.00271237
	174	0.00789718	0.00726228	0.00723165	0.00670493	0.00585172	0.0065547	0.00480644	0.00783575	0.00292174	0.00248171	0.00200537	0.00276425	0.002917	0.00257177	0.00245316	0.00318917	0.00228568	0.00271313	0.00290463	0.00260138	0.00234286	0.00260062	0.00228762	0.00188895	0.00433606	0.0068838	0.00629532	0.0125283	0.00430676	0.00456824	0.00385706	NA	0.00518161	0.00617044	0.00607008	0.00695424	0.00304489	0.00327251	0.00696635	0.00671879	0.0047707	0.0035802	0.00433037	0.00428682	0.00268973	0.00303788	0.00454708	0.00850697
	175	0.0116443	0.010371	0.0100937	0.0112852	0.0515918	0.0195131	0.00804799	0.0386928	0.0534651	0.0148172	0.0056909	0.121682	0.0687303	0.00897648	0.00558484	0.167178	0.0758025	0.00883582	0.00610632	0.142209	0.00302857	0.00340198	0.00382359	0.00337465	0.0111783	0.0128319	0.0145229	0.0123883	0.0112077	0.00772685	0.00726035	NA	0.00299326	0.002882	0.00343091	0.00349314	0.00339288	0.00324477	0.0071743	0.0059161	0.00499004	0.004095	0.0046453	0.00491555	0.012226	0.00388032	0.00509922	0.00419184
	176	0.00773601	0.00710554	0.00749383	0.00813973	0.00531487	0.0318673	0.00596147	0.00577052	0.00475124	0.0322439	0.00544701	0.00476217	0.00537596	0.0154801	0.00566313	0.00530536	0.00416198	0.00654344	0.00481904	0.00516244	0.00453333	0.00414285	0.00531054	0.00428729	0.00254595	0.00294065	0.00328271	0.00419943	0.00559124	0.00519474	0.00564379	NA	0.00311903	0.00262336	0.00282188	0.00294834	0.00440784	0.00330024	0.00547603	0.00532152	0.0042589	0.0031824	0.00427788	0.00382956	0.00248966	0.00252732	0.00376758	0.00308223
	177	0.00394859	0.0039185	0.00338642	0.00405607	0.00397273	0.0055579	0.00376318	0.00285489	0.00447818	0.00571157	0.00371264	0.00369478	0.00621972	0.00412968	0.0029751	0.0038747	0.00675468	0.00454123	0.00343274	0.00362984	0.0027619	0.00284254	0.00245102	0.00286527	0.0164293	0.00394315	0.00438387	0.00370949	0.00904168	0.00289757	0.00348837	NA	0.00397424	0.00472944	0.00503472	0.00413409	0.0121796	0.00651728	0.00849132	0.00772958	0.00917582	0.00786241	0.00719103	0.00725901	0.00577958	0.00569284	0.00721037	0.00493157
	178	0.00842097	0.00655695	0.00740644	0.00736714	0.00735491	0.0065245	0.00562614	0.00753204	0.0059254	0.00416051	0.00319775	0.00325688	0.0048697	0.00358565	0.00438436	0.00351703	0.00361614	0.00338054	0.00368029	0.00352901	0.00373333	0.0110224	0.00346411	0.00311996	0.00226748	0.00351987	0.00299183	0.00233301	0.00322378	0.00261042	0.00405559	NA	0.00311903	0.00338081	0.00702424	0.00342905	0.00504582	0.00460369	0.00454026	0.00327021	0.00237621	0.0018018	0.00202084	0.00234346	0.00242298	0.00288471	0.00191627	0.0023425
	179	0.00737338	0.00663532	0.00596448	0.00764307	0.0156225	0.0125053	0.00875591	0.0182834	0.00881984	0.00989033	0.0127368	0.0124802	0.00913671	0.00699819	0.0122136	0.00813687	0.0102685	0.00722535	0.00967108	0.00780415	0.00533333	0.00414285	0.00410137	0.00379913	0.00449519	0.00351987	0.00725104	0.00601918	0.00826092	0.00488149	0.00657969	NA	0.00160982	0.00193981	0.00200983	0.00182669	0.00371187	0.00310611	0.00467889	0.00538098	0.00199236	0.0018954	0.00207333	0.00194336	0.00164496	0.00140406	0.00165644	0.00160276
	180	0.00483501	0.00441484	0.00487208	0.00435958	0.00375799	0.00428925	0.00439659	0.00419122	0.00188411	0.002135	0.00176147	0.00183371	0.00212145	0.00163209	0.00208779	0.0022056	0.00180807	0.00206024	0.00174938	0.00185525	0.0015619	0.00152711	0.00210788	0.00186773	0.0018299	0.00256193	0.00170368	0.0019364	0.0022919	0.00159236	0.00218378	NA	0.00274172	0.00277116	0.00186772	0.00240354	0.00652477	0.0034389	0.00419367	0.00561881	0.00376538	0.003627	0.00291316	0.00374382	0.00551283	0.00303788	0.0037351	0.00320552
	181	0.00543938	0.00647858	0.00552752	0.00667734	0.00595909	0.00507461	0.00514177	0.00753204	0.0063623	0.00611303	0.00520311	0.00673272	0.00638847	0.00586068	0.00733337	0.00652738	0.00648177	0.00554234	0.00536366	0.00558592	0.00472381	0.00367414	0.00387261	0.00377791	0.00294375	0.00372037	0.0176809	0.00585587	0.00571716	0.00532526	0.00493477	NA	0.00299326	0.00321454	0.00369483	0.00432637	0.0110486	0.00873593	0.00481752	0.00442965	0.00462447	0.0033696	0.00391045	0.00371524	0.00317877	0.00257837	0.0038975	0.0034521
	182	0.0100326	0.0101097	0.0103559	0.00996082	0.00676437	0.0110856	0.00760088	0.0109944	0.00335864	0.00576632	0.00398363	0.00426953	0.00405005	0.00417913	0.0040451	0.0038747	0.00320677	0.00374325	0.00404337	0.00395249	0.0024381	0.00249478	0.00308829	0.00231344	0.00210836	0.00265104	0.0029295	0.00268297	0.00340008	0.00318471	0.0031764	NA	0.00218835	0.00236472	0.00280158	0.00342905	0.00490082	0.00407677	0.00467889	0.00603502	0.00352776	0.0024804	0.00257198	0.00297219	0.0028231	0.00222097	0.00185131	0.00283566
	183	0.0106773	0.00956113	0.00941644	0.00960212	0.0106297	0.00939407	0.00734006	0.0126951	0.0122604	0.00751811	0.00742527	0.00859379	0.0124153	0.00680037	0.00764654	0.00849453	0.0107461	0.00708026	0.00704702	0.0088931	0.00582857	0.00514077	0.00575173	0.00819255	0.0261357	0.00349759	0.00251397	0.00473602	0.00294673	0.00352407	0.00292116	NA	0.00286749	0.00177354	0.00879045	0.00227535	0.00495882	0.0041045	0.00485218	0.00487558	0.00413095	0.0038844	0.00443535	0.00397245	0.00291202	0.00280813	0.00367014	0.00160276
	184	0.00213546	0.00457158	0.00207555	0.00204183	0.00193268	0.00193318	0.00234733	0.00200449	0.00202064	0.00412401	0.00178857	0.00164213	0.00149466	0.00217612	0.0020095	0.00187774	0.00150104	0.00245198	0.00178238	0.00137127	0.00182857	0.00176903	0.00225494	0.00214365	0.0018299	0.00227232	0.00224388	0.00205305	0.00241783	0.00174898	0.00306296	NA	0.00415032	0.00474792	0.00440538	0.00506345	0.00736573	0.00685007	0.00783281	0.00627285	0.00350948	0.0039546	0.0041729	0.0033723	0.00268973	0.00265496	0.00331287	0.00443842
	185	0.00733309	0.00640021	0.00637959	0.00778103	0.00510012	0.00634326	0.00491822	0.0063172	0.00477855	0.00543786	0.00490502	0.00626745	0.00593043	0.00506936	0.00545436	0.00673601	0.00603828	0.00625326	0.0051161	0.00623122	0.00506667	0.00405213	0.00470596	0.00469055	0.00294375	0.00445553	0.00305416	0.0031729	0.00408009	0.00279315	0.00292116	NA	0.00269142	0.002882	0.00239555	0.00846045	0.00591579	0.00318931	0.00609989	0.00475667	0.00601364	0.0044928	0.00519644	0.00460118	0.00402347	0.00530992	0.00604112	0.00493157
	186	0.00612434	0.00637409	0.00506871	0.00554605	0.0062812	0.00422884	0.00424755	0.00941505	0.00600732	0.00458021	0.00504051	0.0102086	0.00597864	0.00479735	0.00488021	0.00977616	0.00535599	0.00491846	0.00457149	0.00816713	0.00405714	0.00409749	0.00560467	0.00401138	0.00318243	0.00349759	0.00434232	0.00368616	0.00687571	0.00527305	0.00779921	NA	0.00168528	0.00206913	0.00168501	0.00198692	0.0121216	0.00590715	0.00592659	0.00484585	0.00341808	0.0029952	0.00314936	0.00351519	0.00177833	0.00316553	0.00256585	0.00172605
	187	0.00652726	0.00574713	0.00583339	0.00653937	0.00515381	0.00534646	0.00499273	0.00601348	0.00447818	0.00483568	0.00457982	0.00470743	0.00568935	0.00477262	0.00545436	0.00539477	0.00440078	0.00458476	0.00453848	0.00488011	0.00380952	0.00393117	0.00383993	0.00375669	0.00286419	0.00372037	0.00384368	0.00405945	0.00521345	0.00415057	0.00326149	NA	0.00193681	0.00264184	0.00215193	0.00246763	0.00350887	0.00318931	0.00734759	0.00529179	0.0029794	0.0033228	0.00354303	0.0032294	0.00224514	0.00247626	0.00305304	0.00382197
	188	0.00962972	0.00815047	0.00686024	0.0096849	0.0192731	0.00776294	0.0048437	0.00753204	0.0195784	0.00808379	0.00761497	0.00771799	0.0137653	0.00680037	0.00618508	0.0077494	0.0138164	0.00700772	0.00645289	0.00810664	0.00647619	0.00551876	0.00606219	0.00532728	0.00445541	0.00514614	0.00598367	0.00629914	0.0110565	0.00459434	0.00711855	NA	0.0022135	0.00249404	0.00259856	0.00275606	0.00893168	0.00651728	0.00769417	0.00903767	0.00424062	0.0045864	0.00454032	0.0037724	0.00288979	0.00339528	0.00418981	0.00283566
	189	0.0106773	0.00890805	0.00858622	0.00927101	0.00842863	0.00866912	0.00797347	0.00850392	0.00464202	0.00527363	0.00430883	0.00435163	0.0045563	0.00479735	0.00409729	0.00464964	0.0037526	0.00461378	0.00437344	0.00449697	0.0257714	0.00317518	0.00341509	0.00307751	0.00592728	0.00681697	0.00893395	0.00727901	0.00569198	0.00454213	0.00445264	NA	0.00337056	0.00351013	0.00347152	0.00294834	0.0056258	0.00296744	0.00582262	0.00437019	0.00330841	0.0027846	0.00296565	0.00302935	0.0033566	0.00285919	0.00289064	0.0034521
	190	0.00717192	0.0066092	0.00587708	0.00756029	0.00799914	0.00673594	0.00558888	0.00820021	0.0091202	0.00948888	0.00712718	0.00832011	0.0110412	0.00675091	0.0069941	0.00926947	0.00934739	0.00632581	0.00625485	0.0074815	0.00674286	0.00681908	0.00660142	0.00528483	0.00708091	0.0101141	0.0117803	0.0122717	0.00687571	0.00522084	0.0335224	NA	0.00387363	0.00432301	0.00379634	0.00442251	0.00359587	0.00285651	0.00859529	0.00552963	0.00413095	0.0032994	0.0037005	0.00374382	0.00200062	0.00314	0.00399493	0.00320552
	191	0.00495588	0.00423197	0.00377969	0.0046631	0.00359693	0.00425905	0.00357688	0.00498087	0.00554312	0.00554734	0.00479662	0.00492638	0.0048697	0.00425332	0.00488021	0.0055438	0.00484427	0.00419302	0.0037133	0.00449697	0.00361905	0.00272158	0.00367653	0.00278037	0.00369958	0.0043887	0.0623091	0.00569256	0.00423121	0.00378511	0.00445264	NA	0.00349633	0.00365793	0.00399935	0.00349314	0.0125855	0.007377	0.0151111	0.0106133	0.00413095	0.0036504	0.00349054	0.00348661	0.00208954	0.00285919	0.00344279	0.00283566
	192	0.00898505	0.00723615	0.0083022	0.00874676	0.00644226	0.00761191	0.0068557	0.0105084	0.00311288	0.00386854	0.00344164	0.00468006	0.00402594	0.00405549	0.00344486	0.00470925	0.00341146	0.0036562	0.0041754	0.00433564	0.00329524	0.00426381	0.00276148	0.0027167	0.00354046	0.00465603	0.006046	0.00835219	0.00340008	0.00289757	0.00323313	NA	0.00364725	0.00345471	0.00274067	0.0039418	0.0055098	0.00474236	0.00499082	0.00395398	0.0029794	0.0027144	0.00307062	0.00291504	0.00255635	0.00255284	0.00263081	0.00271237
	193	0.00906564	0.00796761	0.00758122	0.0102643	0.00858968	0.00897118	0.0066694	0.00856466	0.00608924	0.00890495	0.0057993	0.00662324	0.00773848	0.00714657	0.00688971	0.00590146	0.00644765	0.00663049	0.00587527	0.00592873	0.00672381	0.00485349	0.00545761	0.00443586	0.00727982	0.00904473	0.0109908	0.00877213	0.00873945	0.00639553	0.00952921	NA	0.00493007	0.00508046	0.0047911	0.0050955	0.0189073	0.00826446	0.00499082	0.0064215	0.00818878	0.00666901	0.00824082	0.00651596	0.0056462	0.00676504	0.00630095	0.00616447
	194	0.018091	0.0183908	0.0190514	0.0192594	0.0159983	0.018184	0.017102	0.0179797	0.0107313	0.00990858	0.00948484	0.00944222	0.0106796	0.0085561	0.00929067	0.00980597	0.00730052	0.00805235	0.00820227	0.00826796	0.00754286	0.0062294	0.00651971	0.00653706	0.00922906	0.0121191	0.0126322	0.0108718	0.0111825	0.0108332	0.00986954	NA	0.00616259	0.00753755	0.00611068	0.00647353	0.00646677	0.00651728	0.00397141	0.00508917	0.00581257	0.0043056	0.00569509	0.00608728	0.00577958	0.00479935	0.00490435	0.00406855
	195	0.00725251	0.0066092	0.00672915	0.00673252	0.0048317	0.00800459	0.00562614	0.00734981	0.00745454	0.0084305	0.00710008	0.00826537	0.00800366	0.0076906	0.00871653	0.00807726	0.00627708	0.00600662	0.00688198	0.00734034	0.00641905	0.00450573	0.00524518	0.00445708	0.0095473	0.00815363	0.00822755	0.00867881	0.00622088	0.00464655	0.00547362	NA	0.00716873	0.00792551	0.00712575	0.00810793	0.0169644	0.0116479	0.00555997	0.0182958	0.00310735	0.0032058	0.0027032	0.00325798	0.00353443	0.0029613	0.00279321	0.00283566
	196	0.0125307	0.00914316	0.00937275	0.0111473	0.00869705	0.00818583	0.010209	0.0107514	0.00936595	0.0084305	0.00915964	0.00974328	0.0103903	0.00937214	0.0105694	0.010104	0.00948385	0.00828449	0.0083508	0.0081268	0.00908571	0.00784723	0.00799033	0.00715256	0.00799586	0.00904473	0.00916249	0.00895878	0.00629644	0.00576903	0.0100397	NA	0.00452762	0.00430453	0.00462869	0.00525574	0.00345088	0.00316157	0.00714853	0.0101783	0.00347292	0.0023634	0.00265071	0.00277214	0.00244521	0.00222097	0.00272825	0.00221921
	197	0.00616463	0.00637409	0.00585524	0.00725677	0.00617383	0.00664532	0.00573792	0.00728907	0.00748184	0.00830277	0.00723558	0.00758115	0.00822063	0.00692401	0.00772483	0.00798784	0.00658411	0.00693517	0.00564422	0.00683619	0.00657143	0.00583628	0.00689554	0.00651583	0.00409738	0.00274015	0.00295028	0.00396612	0.00272006	0.00266263	0.00246739	NA	0.00332025	0.00339929	0.00393845	0.00378157	0.00933766	0.00845859	0.00714853	0.00517328	0.0037471	0.0034398	0.00338556	0.00351519	0.00264527	0.00344634	0.00347527	0.00332881
	198	0.00423063	0.00485893	0.00406371	0.00474587	0.00547592	0.00395699	0.00402399	0.00534532	0.00480585	0.00578457	0.00536571	0.00484427	0.00547238	0.00450061	0.00524558	0.00503711	0.00423021	0.00400441	0.00358127	0.00445663	0.0043619	0.00476277	0.00426478	0.00399015	0.00350068	0.0037872	0.00415533	0.0055759	0.00375268	0.00404615	0.00391378	NA	0.00608713	0.00683552	0.00604978	0.00628125	0.0137745	0.00945699	0.00714853	0.00950538	0.00385677	0.0040014	0.00349054	0.00411534	0.00311208	0.00265496	0.00347527	0.00283566
	199	0.0143438	0.0132706	0.0131524	0.0132719	0.0135824	0.0108742	0.01006	0.0150641	0.0123696	0.0122443	0.0107314	0.0114675	0.0136448	0.0101387	0.0118221	0.0115645	0.0115989	0.0112443	0.0101662	0.0119381	0.0108571	0.0102664	0.00949362	0.0100178	0.00541014	0.00583675	0.00600445	0.00585587	0.0867397	0.00644774	0.00655133	NA	0.0025405	0.0031037	0.00304519	0.00374952	0.0055678	0.00332797	0.0158856	0.961516	0.00265039	0.0023634	0.00301814	0.00237204	0.0022896	0.00268049	0.00269577	0.00197263
	200	0.00354567	0.00289969	0.00301501	0.00551846	0.00327482	0.00235607	0.00286896	0.00461641	0.0041232	0.00357658	0.00317065	0.00410532	0.00385719	0.00296743	0.00334047	0.00342762	0.003275	0.0028292	0.00270658	0.00318619	0.00306667	0.00278206	0.00294122	0.0028016	0.00314265	0.00260649	0.00259708	0.00282295	0.687853	0.00386342	0.00640953	NA	0.00530737	0.00528367	0.00535954	0.00474298	0.0082357	0.00538022	0.00555997	0.00820155	0.00829845	0.00622441	0.00792589	0.00683033	0.0035122	0.00510569	0.00574881	0.00678091
	201	0.0063258	0.0049373	0.00561491	0.00720159	0.00633489	0.00546729	0.00603599	0.0243577	0.00690842	0.00708016	0.0060432	0.0255077	0.00824474	0.00618215	0.00587191	0.0150517	0.0067888	0.00606465	0.00547918	0.0106677	0.0064381	0.00450573	0.00563735	0.00515748	0.0165631	0.00490109	0.0731337	0.100483	0.00312449	0.00381121	0.00326149	NA	0.00744542	0.00735281	0.00779569	0.00823612	0.139348	0.00784847	0.0119142	0.00702389	0.00753075	0.00697321	0.00782091	0.00828785	0.00704664	0.0180486	0.00691806	0.0229318
	202	0.0200653	0.011651	0.0128466	0.0131891	0.0138509	0.0119012	0.0109542	0.0074713	0.0095571	0.00810204	0.00794016	0.0122886	0.0102939	0.00781424	0.00981262	0.0128461	0.00951796	0.00819743	0.0083343	0.0134102	0.00678095	0.0127612	0.00565369	0.00611257	0.00880932	0.782592	0.0104091	0.0109885	0.00476895	0.00362848	0.00473625	NA	0.00895462	0.0104196	0.00978521	0.0106076	0.00854139	0.0103167	0.0190627	0.0129963	0.00703723	0.00577981	0.00658741	0.0056586	0.00395679	0.00490146	0.00571633	0.00591789
	203	0.0115553	0.0113898	0.0117979	0.0121406	0.00896548	0.0111762	0.01006	0.0126344	0.00529736	0.00593055	0.00552831	0.00667798	0.00593043	0.00608324	0.00618508	0.0061101	0.00559479	0.00570193	0.00613932	0.00625139	0.0056381	0.00433886	0.00606219	0.00598523	0.00580522	0.0068838	0.00785357	0.00795558	0.0103601	0.00908426	0.00853659	NA	0.0101368	0.01223	0.0115108	0.011537	0.00740024	0.0305619	0.00238284	0.00437416	0.00383849	0.0037908	0.00380547	0.00420108	0.00348997	0.00344634	0.00321543	0.00221921
	204	0.0061369	0.00602876	0.00650444	0.00798285	0.0154155	0.222751	0.586123	0.0804941	0.0518381	0.120906	0.750467	0.0906339	0.0595013	0.0384754	0.931961	0.0461133	0.0999446	0.0241464	0.961141	0.0267719	0.00581518	0.00847404	0.00493434	0.00883584	0.00464268	0.00679566	0.00626616	0.00705951	0.0415846	0.993673	0.0083393	NA	0.00928162	0.00955126	0.0095213	0.00974234	0.0110312	0.00956792	0.00476569	0.00786507	0.00689101	0.00641161	0.00684985	0.00703038	0.0044236	0.00464618	0.0068531	0.00567131
	205	0.0119066	0.010979	0.0104486	0.011309	0.0134048	0.00975372	0.0109423	0.0188557	0.0113727	0.0102299	0.0124279	0.0589404	0.0134136	0.0103119	0.0109171	0.0716733	0.00775194	0.0100892	0.0115184	0.0139496	0.0124762	0.00896232	0.00815758	0.00871958	0.00679821	0.00857923	0.00704418	0.00836952	0.0066437	0.0192308	0.0119501	NA	0.00930677	0.00871991	0.00941979	0.00881297	0.0132098	0.00831993	0.00794281	0.0124075	0.00429545	0.0046332	0.00543264	0.00465834	0.00306762	0.00336975	0.00470947	0.00382197
	206	0.0131655	0.0124447	0.0142544	0.0175549	0.0142985	0.0137162	0.03862	0.0149545	0.0113727	0.00887288	0.0285923	0.010001	0.00894239	0.00851005	0.0122404	0.00784533	0.00775194	0.00887419	0.00858829	0.00774975	0.00824699	0.00735572	0.00764027	0.00833204	0.0100315	0.0100919	0.0105558	0.010189	0.0112486	0.0128205	0.00911305	NA	0.0091307	0.0101424	0.0106176	0.0100949	0.0215091	0.011842	0.00555997	0.00891655	0.00747592	0.00772201	0.00721728	0.008345	0.0200729	0.00643317	0.00773003	0.00517815
	207	0.0100708	0.00887721	0.00867259	0.0321162	0.0113941	0.0348738	0.0073378	0.0123537	0.00423168	0.00571533	0.00861019	0.0070304	0.00412726	0.00851052	0.00650616	0.00798543	0.00830565	0.00924345	0.00650689	0.0149359	0.00666103	0.00696195	0.00640669	0.0052705	0.00704692	0.00573454	0.00685493	0.0105529	0.00520266	0	0.00527296	NA	0.24175	0.790316	0.847923	0.85034	0.0304655	0.0139497	0.00238284	0.00559388	0.00906615	0.00793261	0.00826707	0.00768769	0.45074	0.0190953	0.0156549	0.00801381
	208	0.00503541	0.00384403	0.00422097	0.0294552	0.00469169	0.00584431	0.00450566	0.00312094	0.00476065	0.00379905	0.00430509	0.00396079	0.00515907	0.00406201	0.0039331	0.00448305	0.00276855	0.00390828	0.00406175	0.00535438	0.00465215	0.00363848	0.00362117	0.0042629	0.00220582	0.00243831	0.00206069	0.00536134	0.00358956	0	0.00361083	NA	0.0144381	0.0140221	0.0139673	0.103769	0.0110658	0.0126463	0.00317712	0.00807537	0.00784149	0.00819001	0.00761095	0.00791632	0.0349664	0.00714796	0.00870441	0.00678091
	209	0.0177288	0.0102046	0.00982586	0.0355533	0.0118409	0.00779241	0.00965499	0.016775	0.0103147	0.00820594	0.00926001	0.0174275	0.0099742	0.00788708	0.00779269	0.0133091	0.0107973	0.00930458	0.00666855	0.0119769	0.0142736	0.0184444	0.0102666	0.00852581	0.00636294	0.00600546	0.00574048	0.00924286	0.231255	0.0192308	0.0733056	NA	0.0140356	0.0126365	0.0155305	0.0127868	0.0102704	0.00990072	0.00635425	0.00811743	0.00711035	0.00776881	0.00766344	0.00780201	0.00697995	0.00679056	0.00798987	0.00678091
	210	0.0122738	0.013219	0.0132626	0.00701456	0.0136282	0.0136367	0.0114573	0.0186903	0.0142819	0.0133181	0.0126716	0.0158432	0.0147893	0.012863	0.013674	0.0110675	0.0105205	0.0129081	0.0119832	0.0146541	0.0133221	0.011451	0.0135694	0.012905	0.00772037	0.00799223	0.00906281	0.0042654	0.233466	0.0192308	0.0732367	NA	0.0119479	0.0129321	0.0132973	0.0149019	0.0125182	0.010178	0.025417	0.0140898	0.0084264	0.00783901	0.00826707	0.00783059	0.00609078	0.00615235	0.00753516	0.00641105
	211	0.0190926	0.0131361	0.0158229	0.0505899	0.0187668	0.0263383	0.0122297	0.431703	0.0103147	0.0156329	0.0113719	0.319735	0.0115219	0.0112044	0.00808675	0.186747	0.0121816	0.0116531	0.00834579	0.115401	0.0185029	0.690382	0.0119777	0.0152302	0.0145923	0.00873727	0.0318145	0.0143128	0.00739562	0.0128205	0.00710525	NA	0.0102626	0.0102718	0.0103536	0.0095821	0.00885262	0.0082922	0.00635425	0.00925303	0.00742108	0.00678601	0.0064037	0.00614444	0.00569066	0.00579496	0.00708045	0.00591789
	212	0.0160504	0.0120852	0.0128474	0.0547348	0.0136282	0.0109094	0.00991246	0.395025	0.00925681	0.00697615	0.00544229	0.280919	0.0103181	0.00632997	0.00610182	0.186747	0.00913621	0.00717116	0.00763852	0.116387	0.00507507	0.00729272	0.00724234	0.00616184	0.00729617	0.0674599	0.0106609	0.0109005	0.00720839	0.0128205	0.00607176	NA	0.0181608	0.0186961	0.0208697	0.0191963	0.0238952	0.0194132	0.00714853	0.00874832	0.0197225	0.0173394	0.0182925	0.0174045	0.0133597	0.0144236	0.0839586	0.0168906
	213	0.182271	0.0560564	0.0475147	0.219767	0.325067	0.434271	0.314367	0.290087	0.61571	0.690005	0.563236	0.332469	0.780739	0.893914	0.870244	0.594354	0.606312	0.929508	0.92513	0.596927	0.461831	0.0483713	0.0594509	0.0315455	0.536354	0.139774	0.880018	0.383318	0.165325	0.294872	0.643058	NA	0.0115454	0.010438	0.0143936	0.0123061	0.00982087	0.00826446	0.122319	0.0203567	0.00722002	0.00739441	0.00721728	0.00828785	0.00775797	0.007633	0.00896424	0.00764394
	214	0.0108576	0.0082135	0.0101488	0.0111049	0.00737265	0.0090392	0.00823893	0.0246688	0.00634753	0.00599315	0.00601088	0.0167941	0.00825451	0.00616072	0.00665319	0.0107784	0.00775194	0.00683053	0.0070525	0.00760215	0.00740114	0.00670993	0.00728213	0.00647186	0.00576907	0.00785677	0.00656055	0.00748815	0.00627223	0.00641026	0.007622	NA	0.00714358	0.00740823	0.00704454	0.00730676	0.00950965	0.00915192	0.00397141	0.00542564	0.00824362	0.00622441	0.0078734	0.00788774	0.00502379	0.00594813	0.00711293	0.00505486
	215	0.0144243	0.0112832	0.0126398	0.0132149	0.0100536	0.0109094	0.0111998	0.0276382	0.0108437	0.00992516	0.00926001	0.0140634	0.0135856	0.00968113	0.0106966	0.0107784	0.0102436	0.0108284	0.0110738	0.0123535	0.0133221	0.0117503	0.0102268	0.00914587	0.00831424	0.00936943	0.00914692	0.0107109	0.00870623	0	0.00820334	NA	0.00827548	0.00600418	0.00722725	0.00660172	0.00964797	0.00843086	0.00873709	0.0103886	0.00639748	0.00615421	0.0056426	0.00763053	0.00433468	0.00329317	0.00555393	0.00863026
	216	0.00839234	0.00793695	0.00800369	0.0123265	0.00759607	0.00919504	0.00901133	0.00799452	0.00687649	0.00770548	0.00739176	0.00709995	0.0103181	0.00809018	0.00768241	0.00838323	0.00581395	0.00715323	0.00806289	0.0106113	0.00687249	0.00760774	0.00871468	0.00747946	0.00602359	0.00566681	0.00645541	0.0064455	0.00748923	0.00641026	0.00752511	NA	0.0106651	0.0103641	0.0114093	0.0103833	0.0104779	0.00901326	0.00238284	0.00849596	0.00923066	0.00917281	0.00929061	0.00945958	0.00753568	0.00699479	0.00954886	0.00776723
	217	0.00765801	0.00807522	0.00869565	0.0101055	0.00915996	0.00779241	0.0132595	0.00845135	0.00555409	0.00643709	0.015677	0.00614418	0.00980224	0.00721007	0.0184525	0.00804106	0.00747508	0.00693809	0.0176414	0.00649351	0.00771833	0.00823778	0.00668524	0.00713068	0.0067023	0.00684081	0.00889459	0.00862559	0.00767647	0	0.027872	NA	0.00467854	0.00485876	0.00537984	0.00576849	0.0102358	0.00784847	0.00873709	0.00937921	0.00676306	0.00573301	0.00632496	0.00668743	0.00429022	0.00459512	0.00610608	0.004685
	218	0.00508786	0.00492257	0.00495906	0.00533037	0.00558534	0.00553261	0.00566426	0.00662403	0.00819889	0.00526383	0.00503615	0.00518842	0.00670679	0.00541602	0.00573424	0.00410607	0.00802879	0.00598792	0.00602191	0.0050681	0.00644957	0.00431578	0.004616	0.00457293	0.00500551	0.00451539	0.00513069	0.00597156	0.00622543	0.00641026	0.00536124	NA	0.00890432	0.00881228	0.00897316	0.00926163	0.00878346	0.00751567	0.00794281	0.00593035	0.00754903	0.00655201	0.00698108	0.00797348	0.0063353	0.00612683	0.00698301	0.00567131
	219	0	0	0	0	0	0	0	0	0	0	0	0	0	0	0	0	0	0	0	0	0	0	0	0	0	0	0	0	0	0	0	NA	0.00440185	0.0043969	0.00489261	0.00493526	0.00311225	0.00357757	0	0	0.00413095	0.0040716	0.00367425	0.00468692	0.00326768	0.00329317	0.0043522	0.0150413
[truncated: 24 more columns]
