# Supplementary material for: Contingency and chance erase necessity in the experimental evolution of ancestral proteins
Source: eLife. 2021 Jun 1;10:e67336. doi: 10.7554/eLife.67336 (PMC8282340; doi:10.7554/eLife.67336)
Supplement: Supplementary file 5. [file elife-67336-supp5.xlsx]

## Sheet: Lux Assay N-term Plasmids
Label	Description	RNAP Fusion	Vector Map
16-75	IPTG-driven 29-1 T7 RNAP-N-term-no-protein	No protein	https://benchling.com/s/seq-I6koWFOBxZ9bvPcgPJp7
18-56	IPTG-driven 29-1 T7 RNAP-N-term-BCL-2	hsBCL-2	https://benchling.com/s/seq-j64iYIbaWmp18bslrmFY
31-54	IPTG-driven 29-1 T7 RNAP-N-term-MCL-1	hsMCL-1	https://benchling.com/s/seq-ecBPQTmIluhV6Ygeu6Wd
27-16	IPTG-driven 29-1 T7 RNAP-N-term-AncBCL-O	AncBCL-O	-
26-76	IPTG-driven 29-1 T7 RNAP-N-term-AncBCL-G	AncBCL-G	-
27-15	IPTG-driven 29-1 T7 RNAP-N-term-AncB5	AncB5	-
27-14	IPTG-driven 29-1 T7 RNAP-N-term-AncB4	AncB4	-
26-75	IPTG-driven 29-1 T7 RNAP-N-term-AncB3	AncB3	-
40-05	IPTG-driven 29-1 T7 RNAP-N-term-AncB2	AncB2	-
30-20	IPTG-driven 29-1 T7 RNAP-N-term-AncB1	AncB1	-
30-19	IPTG-driven 29-1 T7 RNAP-N-term-AncMB1_B	AncMB1_B	-
30-18	IPTG-driven 29-1 T7 RNAP-N-term-AncMB1_M	AncMB1_M	-
27-12	IPTG-driven 29-1 T7 RNAP-N-term-AncM1	AncM1	-
28-43	IPTG-driven 29-1 T7 RNAP-N-term-AncM2	AncM2	-
28-44	IPTG-driven 29-1 T7 RNAP-N-term-AncM3	AncM3	-
28-45	IPTG-driven 29-1 T7 RNAP-N-term-AncM4	AncM4	-
26-74	IPTG-driven 29-1 T7 RNAP-N-term-AncM6	AncM6	-
32-70	IPTG-driven 29-1 T7 RNAP-N-term-M6_M_alt	M6_M_alt	-
32-71	IPTG-driven 29-1 T7 RNAP-N-term-MB1_M_alt_0.2	MB1_M_alt_0.2	-
32-72	IPTG-driven 29-1 T7 RNAP-N-term-MB1_B_alt_0.2	MB1_B_alt_0.2	-
32-73	IPTG-driven 29-1 T7 RNAP-N-term-B1_B alt	B1_B alt	-
40-06	IPTG-driven 29-1 T7 RNAP-N-term-B2_B_alt	B2_B_alt	-
32-74	IPTG-driven 29-1 T7 RNAP-N-term-B3_B_alt	B3_B_alt	-
32-75	IPTG-driven 29-1 T7 RNAP-N-term-B4_B_alt	B4_B_alt	-
32-76	IPTG-driven 29-1 T7 RNAP-N-term-B5_B_alt	B5_B_alt	-
34-01	IPTG-driven 29-1 T7 RNAP-N-term-MB1_B_alt_0.4	MB1_B_alt_0.4	-
34-02	IPTG-driven 29-1 T7 RNAP-N-term-MB1_B_alt_0.35	MB1_B_alt_0.35	-
34-03	IPTG-driven 29-1 T7 RNAP-N-term-MB1_B_alt_0.3	MB1_B_alt_0.3	-
34-04	IPTG-driven 29-1 T7 RNAP-N-term-MB1_B_alt_0.25	MB1_B_alt_0.25	-
Jin 514	IPTG-driven 29-1 T7 RNAP-N-term-BCL-2-Hydra_magnipapillata	BCL-2-Hydra_magnapapillata (with human BCL-2 mask)	-
Jin 515	IPTG-driven 29-1 T7 RNAP-N-term-BCL-2-Saccoglossus_kowalevskii	BCL-2-Saccoglossus_kowalevskii (with human BCL-2 mask)	-
Jin 516	IPTG-driven 29-1 T7 RNAP-N-term-BCL-2-Octopus_bimaculoides	BCL-2-Octopus_bimaculoides (with human BCL-2 mask)	-
Jin 517	IPTG-driven 29-1 T7 RNAP-N-term-BCL-2-Branchiostoma belcheri	BCL-2- Branchiostoma belcheri (with human BCL-2 mask)	-
33-33	IPTG-driven 29-1 T7 RNAP-N-term-BCL-2-Trichoplax_adhaerens	BCL-2-Trichoplax_adhaerens (with human BCL-2 mask)	-
33-34	IPTG-driven 29-1 T7 RNAP-N-term-BCL-2-Stegodyphus_mimosarum	BCL-2-Stegodyphus_mimosarum (with human BCL-2 mask)	-
N-terminal expression plasmids were made for PACE evolved variants by cloning the evolved N-term-BCL-2-family-protein fusion into the expression vector backbone.

## Sheet: Lux Assay C-term Plasmids
Label	Description	RNAP Fusion	Vector Map
Jin 495	pKat sd5 T7 RNAP-C-term-no-peptide	No peptide	https://benchling.com/s/seq-rK6QckKjpsuauJrMIQML
Jin 497	pKat sd5 T7 RNAP-C-term-BID	BID	https://benchling.com/s/seq-ndJFaQpW5SpFxLk9WmTh
Jin 499	pKat sd5 T7 RNAP-C-term-NOXA	NOXA	https://benchling.com/s/seq-dRTZsl7riLi8xmm90ImF

## Sheet: Lux Assay Reporter Plasmid
Label	Description	RNAP Fusion	Vector Map
2-22	T7-driven SD8 luciferaseAB	N/A	https://benchling.com/s/seq-nrH25Fv4nbu0URjidsfT

## Sheet: Phage Plasmids
Label	Description	RNAP Fusion	Vector Map
pH4	SP, 29-1 T7 RNAP-N-term-BCL-2	hsBCL-2	https://benchling.com/s/seq-ZnbycCNj3qfr4iOhH9C4
31-53	SP, 29-1 T7 RNAP-N-term-MCL-1	hsMCL-1	https://benchling.com/s/seq-IxWE1C7bpzmIeKtXezTx
26-52	SP, 29-1 T7 RNAP-N-term-AncB5	AncB5	-
26-51	SP, 29-1 T7 RNAP-N-term-AncB4	AncB4	-
30-81	SP, 29-1 T7 RNAP-N-term-AncB1	AncB1	-
30-80	SP, 29-1 T7 RNAP-N-term-AncMB1_B	AncMB1_B	-
30-79	SP, 29-1 T7 RNAP-N-term-AncMB1_M	AncMB1_M	-
26-17	SP, 29-1 T7 RNAP-N-term-AncM6	AncM6	-
32-50	SP, 29-1 T7 RNAP-N-term-B1-3	B1-3 (evolved BCL-2 variant)	-
32-51	SP, 29-1 T7 RNAP-N-term-B2-1	B2-1 (evolved BCL-2 variant)	-
32-52	SP, 29-1 T7 RNAP-N-term-B3-1	B3-1 (evolved BCL-2 variant)	-
32-53	SP, 29-1 T7 RNAP-N-term-B4-2	B4-2 (evolved BCL-2 variant)	-

## Sheet: Positive Selection Plasmids
Label	Description	RNAP Fusion	Vector Map
28-46	posAP, pKat sd5 BID-CGG-C-term, CGG-driven sd8 gIII	BID	https://benchling.com/s/seq-N8FCRsrgAsCvuLmjjC9T
28-48	posAP, pKat sd5 NOXA-CGG-C-term, CGG-driven sd8 gIII	NOXA	https://benchling.com/s/seq-di7EypoDT1YCTlDvTzzC
Jin 484	posAP, pKat SD8 NOXA-CGG-C-term, CGG-driven SD8 gIII	NOXA	- (used in I PACE activity-dependent plaque assays to isolate NOXA-binding variants)

## Sheet: Negative Selection Plamids
Label	Description	RNAP Fusion	Vector Map
29-39	negAP, pKat sd8 ZBneg-T7-C-term, T7-driven SD8 gIIIneg	ZBneg	https://benchling.com/s/seq-YcjMCxrRjSYT2OA9ADTz
Jin 487	negAP, pKat sd8 NOXA-T7-C-term, T7-driven SD8 gIIIneg	NOXA	https://benchling.com/s/seq-ACvS9OLgNLYNQCDomvNV
Jin 518	negAP, pKat sd5 BID-T7-C-term, T7-driven SD8 gIIIneg	BID	https://benchling.com/s/seq-nv8DjSEMLOLVoPWG29xC

## Sheet: Mutagenesis Plasmid
Label	Description	RNAP Fusion	Vector Map
6-65	Mutagenesis Plasmid 6 (MP6) / MP-T4 (Addgene #69696)	N/A	https://www.addgene.org/69696/

## Sheet: Protein Expression Plasmids
Label	Description	RNAP Fusion	Vector Map
4-2	pLacO 6xHis GST-only	No protein	https://benchling.com/s/seq-cAOrOQheFd75zeHfHWRl
Jin 479	pLacO 6xHis GST-TEVlinker-BCL-2	hsBCL-2	https://benchling.com/s/seq-ZXcbCJ3HIbDgtCxdxiPl
31-55	pLacO 6xHis GST-TEVlinker-MCL-1	hsMCL-1	https://benchling.com/s/seq-Zbo0aiGdFqrJaXxlVFZN
Jin 519	pLacO 6xHis GST-TEVlinker-B1-3	B1-3 (evolved BCL-2 variant)	-
Jin 520	pLacO 6xHis GST-TEVlinker-B2-1	B2-1 (evolved BCL-2 variant)	-
Jin 521	pLacO 6xHis GST-TEVlinker-B3-1	B3-1 (evolved BCL-2 variant)	-
Jin 522	pLacO 6xHis GST-TEVlinker-B4-2	B4-2 (evolved BCL-2 variant)	-
Jin 523	pLacO 6xHis GST-TEVlinker-L1-1	L1-1 (evolved MCL-1 variant)	-
33-60	pLacO 6xHis GST-TEVlinker-L3-1	L3-1 (evolved MCL-1 variant)	-
Jin 524	pLacO 6xHis GST-TEVlinker-L3-3	L3-3 (evolved MCL-1 variant)	-
Jin 525	pLacO 6xHis GST-TEVlinker-L4-3	L4-3 (evolved MCL-1 variant)	-

## Sheet: DNA Sequences
Protein	Sequence
hsBCL-2	GCGCACGCTGGGAGAACTGGGTACGACAACCGCGAGATTGTGATGAAATATATCCACTACAAGCTTTCTCAGCGTGGCTACGAGTGGGATGCCGGGGACGTAGGTGCAGCACCACCAGGGGCAGCACCCGCCCCGGGCATTTTTTCATCTCAACCAGGCCACACTCCCCATCCAGCTGCCTCTCGCGATCCCGTCGCACGCACGAGTCCTCTTCAGACACCCGCCGCTCCGGGAGCGGCAGCTGGACCTGCCTTAAGCCCGGTGCCACCTGTGGTCCACCTGACCCTCCGCCAGGCCGGCGACGACTTCTCCCGCCGCTACCGCCGCGACTTCGCCGAGATGTCCAGCCAGCTGCACCTGACGCCCTTCACCGCGCGGGGACGCTTTGCCACGGTGGTG…
hsMCL-1	GAAGCCCCGGCCGCTGACGCCATCATGTCGCCCGAAGAGGAGCTGGACGGGTACGAGCCGGAGCCTCTCGGGAAGCGGCCGGCTGTCCTGCCGCTGCTGGAGTTGGTCGGGGAATCTGGTAATAACACCAGTACGGACGGGTCACTACCCTCGACGCCGCCGCCAGCAGAGGAGGAGGAGGACGAGTTGTACCGGCAGTCGCTGGAGATTATCTCTCGGTACCTTCGGGAGCAGGCCACCGGCGCCAAGGACACAAAGCCAATGGGCAGGTCTGGGGCCACCAGCAGGAAGGCGCTGGAGACCTTACGACGGGTTGGGGATGGCGTGCAGCGCAACCACGAGACGgccTTCCAAGGCATGCTTCGGAAACTGGACATCAAAAACGAAGACGATGTGAAA…
AncBCL-O	GCGCACGCTGGGAGAACTCCATATGACAACCGCGAAATTGTCGTTAAGTATATCCACTACAAGCTGAGCCAGCGCGGATATGAATGGGATGCCGGGGATGTAGGTGCGGCGCCTCCTGGTGCTGCACCTGCACCCGGCATTTTTAGCAGTCAGCCGGGTCATACCCCCCATCCTGCTGCCTCTCGTGATCCTGTCGCCCGTACGTCGCCGTTACAAACTCCTGCTGCGCCCGGTGCCGCGGCCGGACCGGCCTTATCGCCTGTGCCCCCTGCTGTACATCGCACGCTGCGTGAAGCGGGTGATGAGTTTTCCCGCCGCTACCAGCGCGACTTTGCGGAAATGTCCGGTCAATTGCACTTAACCCCAAGTACAGCCCGTGGTCGCTTCGCTGCAGTAGTG…
AncBCL-G	GCGCACGCTGGGAGAACTCCATACGATTCTCGTGAATTGGTAGTGGACTACATTCATTATAAGTTGTCTCAACGTGGGTACGAGTGGGATGCCGGCGATGTAGGCGCTGCTCCACCGGGAGCCGCCCCGGCACCTGGCATTTTTTCGTCGCAACCAGGCCACACTCCGCACCCAGCCGCTTCGCGTGATCCGGTTGCTCGCACTTCTCCGTTGCAGACACCAGCAGCCCCTGGCGCGGCAGCCGGACCAGCGTTATCTCCGGTGCCTCCCGCCGTTCATCGCGCCTTGCGTGAAGCCGGAGACGAGTTTGAACGTCGTTACCAACGCGATTTCGCCGATATGTCAAGTCAGTTACACTTGACACCCTCGACTGCTCGCGGGCGCTTTGCTGCCGTTGCT…
AncB5	GCGCACGCTGGGAGAACTCCCTATGATTCGCGCGAGCTGGTTGAGGATTACATCCATTATAAGTTATCGCAACGTGGATACGAATGGGACGCGGGTGATGTAGGCGCGGCACCTCCAGGCGCTGCTCCCGCACCAGGCATCTTTTCCTCGCAGCCTGGGCATACTCCTCATCCCGCAGCATCACGTGACCCAGTGGCACGTACGTCGCCATTACAGACCCCCGCAGCGCCAGGAGCGGCCGCTGGACCTGCCTTGTCTCCAGTCCCTCCACCGGTACACCGCGCTATGCGCGAAGCAGGGGACGAGTTCGAACGTCGCTATCGTCGTGCCTTCGCCGACATGTCCTCTCAACTGCATATTACCCCCGGGACTGCATACCAACGCTTCGCCGAGGTGGCG…
AncB4	GCGCACGCTGGGAGAACTGCGTCGGATAGCCGTAATCTTGTTGAGGACTATATCCATTATAAGCTGTCTCAGCGTGGATATGAATGGGATGCTGGCGATGTGGGAGCAGCGCCTCCTGGAGCAGCCCCGGCCCCTGGGATCTTCTCTTCGCAGCCAGGGCATACACCCCATCCGGCGGCTAGTCGTGACCCCGTGGCACGTACATCTCCGTTACAAACTCCCGCAGCCCCCGGTGCGGCAGCAGGTCCAGCCCTTTCACCTGTACCTCCCAAAGTGCATCGCACAATGCGTGAACTGGGGGATGAATTTGAGGAGCGTTACCGTGATCAGTTCGACGATATGTCGGATCAACTGCACATCACGCCAAATACAGCATATCAGACCTTCACTGGAGTAGCC…
AncB3	GCGCACGCTGGGAGAACTGCCAGCGATTCACGTAATTTGGTTGAGGACTATATTCATTATCGTCTGCGCCAACGCGGCTATGAGTGGGACGCGGGAGATGTCGGTGCAGCCCCACCCGGGGCTGCTCCAGCACCTGGCATCTTTAGTTCCCAACCCGGTCACACCCCACATCCCGCCGCGTCACGTGACCCTGTTGCCCGCACCTCCCCCTTACAAACTCCTGCAGCACCTGGAGCCGCTGCAGGACCTGCCCTGAGCCCGGTTCCTCCCAAAGTTCATCGTACGATGCGCGCGTTAGGCGACGAGTTCGAGGAGCGCTATCGCGATCAATTTGACGACATGTGCGACCAGTTACATATTACCCCCAATACAGCCTACCCAACATTCACGGGAGTGGCG…
AncB2	GCGCACGCTGGGAGAACTGTGGAACAGTCACGCAATTTGGTCAAGGATTATATCCACTATCGTCTTCGCCAACGTGGGTACGAATGGGACGCAGGGGATGTAGGTGCCGCCCCACCGGGAGCAGCCCCAGCCCCGGGAATTTTTTCAAGTCAACCAGGACACACGCCCCACCCAGCAGCGTCTCGTGATCCAGTAGCCCGCACTTCGCCTCTGCAAACACCCGCAGCACCGGGGGCAGCCGCAGGACCGGCACTTTCCCCTGTACCACCAAAGGTAAGCCGCACACTGCGCCGCGTAGCTGACGAACTTGAGGAGAAATACCAAGATCAATTTGACAATATGTGCGACCAGTTGCATATTACACCCAACACCGCGTACCCGACATTTACAGGGGTCGCA…
AncB1	GCGCACGCTGGGAGAACTGTGGAACAGTCACGCAATTTGGTCAAGGATTATATCCACTATCGTCTTCGCCAACGTGGGTACGAATGGGACGCAGGGGATGTAGGTGCCGCCCCACCGGGAGCAGCCCCAGCCCCGGGAATTTTTTCAAGTCAACCAGGACACACGCCCCACCCAGCAGCGTCTCGTGATCCAGTAGCCCGCACTTCGCCTCTGCAAACACCCGCAGCACCGGGGGCAGCCGCAGGACCGGCACTTTCCCCTGTACCACCAAAGGTAAGCCGCACACTGCGCAAGGTCGCTGATGAGCTTGAGGAAAAATACCAAGATCAATTCGATAACATGTGCGATAAGTTGCACATCACACCAGACACTGCTTATCCAACTTTTACTGGTGTGGCG…
AncMB1_B	GCGCACGCTGGGAGAACTGTTGAACAAGCTAAGAACTTGGTGAAGGATTATATCCATTATCGCCTTCGCCAGCGCGGATACGAATGGGATGCCGGCGATGTCGGTGCAGCCCCACCTGGAGCCGCACCTGCGCCGGGAATCTTTTCTAGTCAACCGGGACATACGCCTCATCCTGCGGCAAGTCGCGATCCAGTTGCACGTACCTCTCCGCTTCAAACTCCAGCTGCACCTGGGGCGGCAGCTGGCCCAGCATTATCACCAGTGCCTCCCAAAGTATCACGTACATTACGCAAGGTAGCCGACGAGTTGGAAGAGAAATATCAGGACCAATTTGACAACATGTGTGATAAATTGCATATCACCCCCGACACAGCGTACCCGACCTTCACTGGTGTAGCG…
AncMB1_M	GAAGCCCCGGCCGCTGACGCCATCATGTCGCCCGAAGAGGAGCTGGACGGGTACGAGCCGGAGCCTCTCGGGAAGCGGCCGGCTGTCCTGCCGCTGCTGGAGTTGGTCGGGGAATCTGGTAATAACACCAGTACGGACGGGTCACTACCCTCGACGCCGCCGCCAGCAGAGGAGGAGGAGGAAGAGATCGTCGAACAGGCAAAGAATTTGGTGAAAGATTACATCCACTATCGTCTGCGTGGTGCGAAAGATACTAAACCAATGGGTCGCAGTGGGGCTACCAGTCGCAAAGTTAGTCGCACTTTACGCAAGGTTGCCGACGAGCTTGAGGAGAAATATCAAGATCAGTTTGATAATATGTGTGACAAATTGCATATTACCCCGGATACTGCATATCCT…
AncM1	GAAGCCCCGGCCGCTGACGCCATCATGTCGCCCGAAGAGGAGCTGGACGGGTACGAGCCGGAGCCTCTCGGGAAGCGGCCGGCTGTCCTGCCGCTGCTGGAGTTGGTCGGGGAATCTGGTAATAACACCAGTACGGACGGGTCACTACCCTCGACGCCGCCGCCAGCAGAGGAGGAGGAGGAGGAAATTGCGCAGCAGGCGAAAAATCTTGCAAAAGACTATATCCACTATCGCTTAGGGGGAGCTAAAGATACAAAGCCAATGGGTCGCAGCGGCGCAACGTCGCGCAAGACTGCCAAAACGCTGCGCCGTGTGGCTGATGAGCTGGAAGAAAAACATCAGGTGCCGTTCAACAACATGTGTAACAAATTGAATATCACACCTGACACTGCTTACGAG…
AncM2	GAAGCCCCGGCCGCTGACGCCATCATGTCGCCCGAAGAGGAGCTGGACGGGTACGAGCCGGAGCCTCTCGGGAAGCGGCCGGCTGTCCTGCCGCTGCTGGAGTTGGTCGGGGAATCTGGTAATAACACCAGTACGGACGGGTCACTACCCTCGACGCCGCCGCCAGCAGAGGAGGAGGAGGAAGAAATTGCCCAAGAAGCAAAGGATCTTGCTAAGGACTACATCCACTACAAGTTAGGTGGGGCAAAAGATACTAAGCCCATGGGACGCAGTGGAGCCACCTCGCGCAAGACTGCCAAAACGCTTCGCCGTGTGGCGGATGAATTGTTGGAAAAACACCAAATCAGTTTTAATGGAATGGTCAATAAGTTGAACATTAGTCCCGACACGGCTTACGAG…
AncM3	GAAGCCCCGGCCGCTGACGCCATCATGTCGCCCGAAGAGGAGCTGGACGGGTACGAGCCGGAGCCTCTCGGGAAGCGGCCGGCTGTCCTGCCGCTGCTGGAGTTGGTCGGGGAATCTGGTAATAACACCAGTACGGACGGGTCACTACCCTCGACGCCGCCGCCAGCAGAGGAGGAGGAGGAGGAGATTCGTCAAGAGGCCAAAGACCTGGCTAAAGACTATATTCATTATAAGTTGGGTGGAGCCAAAGACACAAAACCTATGGGTCGCTCAGGCGCGACCAGTCGCAAGACGGCCAAAACACTGCGTCGTGTGGCAGACGAGTTGCTGGAAAAGCATCAGATTAGTTTCAACGGGATGGTTAACAAACTGAATATCTCCCCAGACACAGCATACGAG…
AncM4	GAAGCCCCGGCCGCTGACGCCATCATGTCGCCCGAAGAGGAGCTGGACGGGTACGAGCCGGAGCCTCTCGGGAAGCGGCCGGCTGTCCTGCCGCTGCTGGAGTTGGTCGGGGAATCTGGTAATAACACCAGTACGGACGGGTCACTACCCTCGACGCCGCCGCCAGCAGAGGAGGAGGAGGACGAGATCCGCCAGGAAGCACATGAGCTGGCTCGTGATTATATTCACTACAAATTAGGCGGGGCTAAAGATACGAAGCCTATGGGCCGTTCCGGGGCGACCTCTCGTAAGGCGGCAAAAACTTTACGCCGTGTAGGTGACGAGCTTATCGAAAAGCACCAGATTGCGTTCAACGGCATGGTGAATAAACTGAACATCAGTCCCGATACGGACGACGAG…
AncM6	GAAGCCCCGGCCGCTGACGCCATCATGTCGCCCGAAGAGGAGCTGGACGGGTACGAGCCGGAGCCTCTCGGGAAGCGGCCGGCTGTCCTGCCGCTGCTGGAGTTGGTCGGGGAATCTGGTAATAACACCAGTACGGACGGGTCACTACCCTCGACGCCGCCGCCAGCAGAGGAGGAGGAGGACAGCATCCGTCGTGAAGCCCATGAGTTGGCGCGTGACTACCTTCGCTATCACTTAGGGGGTGCCAAAGATACCAAACCGATGGGGCGTAGTGGCGCGACATCCCGTAAAGCGGCAGAGACGTTACGCCGCGTGGGGGACGAACTGATCGAGAAACATCAAATTGCCTTCAACGGTATGGTAAACAAACTGAACATCTCAAGCGAAGAGGACCTGGAA…
M6_M_alt	GAAGCCCCGGCCGCTGACGCCATCATGTCGCCCGAAGAGGAGCTGGACGGGTACGAGCCGGAGCCTCTCGGGAAGCGGCCGGCTGTCCTGCCGCTGCTGGAGTTGGTCGGGGAATCTGGTAATAACACCAGTACGGACGGGTCACTACCCTCGACGCCGCCGCCAGCAGAGGAGGAGGAGGAATCAGTTAAGCGTCAAGCCCACCAGTTAGTTAAGGACTACATTCGCCATCGCGTTCACGGGGCAAAAGATACAAAGCCCATGGGACGCAGTGGAGCCACGTCTCGTCGCACCGCTGAGACTCTTCGTCGTGTAGGGGACGAATTAGTTGATAAACATCAGGTCGCATTTAATGGGATGGTAAATCGTCTTAATGTCTCGAACGATGAGGATCTGGAA…
MB1_M_alt_0.2	GAAGCCCCGGCCGCTGACGCCATCATGTCGCCCGAAGAGGAGCTGGACGGGTACGAGCCGGAGCCTCTCGGGAAGCGGCCGGCTGTCCTGCCGCTGCTGGAGTTGGTCGGGGAATCTGGTAATAACACCAGTACGGACGGGTCACTACCCTCGACGCCGCCGCCAGCAGAGGAGGAGGACGAGGACATCGCCGACCAGGCACGTAACTTAGTGAAAGACTACATCCACTATCGCCTTCGCGGTGCGAAGGATACAAAGCCTATGGGCCGTTCAGGCGCAACCAGTCGTAAGGTCGCTAAGACACTGCGTCGCATCGCGGACGAACTGGAGGAGAAATACCAGGAACAATTTGATGACATGTGTGACAAATTGCACATTACTCCAGATACAGCTTATCCT…
MB1_B_alt_0.2	GCGCACGCTGGGAGAACTGCCGATCAGGCACGCAACCTTGTGAAAGACTATATTCACTATCGCCTTCGTCAGCGCGGGTATGAGTGGGACGCCGGGGACGTCGGTGCGGCACCACCAGGAGCGGCGCCTGCACCTGGCATCTTTAGTAGTCAGCCCGGACACACTCCCCACCCGGCTGCATCTCGTGATCCCGTTGCCCGTACGTCTCCGTTACAAACTCCTGCGGCTCCTGGGGCTGCTGCCGGCCCGGCTCTGTCGCCTGTTCCCCCAAAAGTTGCAAAGACATTGCGCCGTATTGCGGACGAATTAGAGGAAAAATATCAGGAACAATTTGACGATATGTGCGATAAACTGCACATTACCCCTGATACCGCATATCCTACTTTCGTCGGAGTAGCT…
B1_B_alt	GCGCACGCTGGGAGAACTGCGGATGAGTCTAAAAACTTAGTTAAGGATTACATTAGCTACCGCTTACGCCAGCGTGGGTACGAGTGGGATGCGGGCGATGTCGGAGCTGCTCCACCAGGAGCAGCACCCGCTCCAGGCATTTTTTCGTCCCAGCCTGGCCACACACCTCATCCCGCAGCGTCACGCGACCCTGTCGCTCGCACATCTCCCTTGCAGACTCCTGCGGCACCAGGCGCTGCAGCTGGACCTGCACTGTCCCCCGTCCCACCTAAAGTAGCTAAAACCCTGCGTCGTATCGGCGACGAACTTGAGGAAAAATACCGTGATCAGTTCGACAATATGTGTGATCAACTTCACATTACACCTAACACGGCATACCCGACGTTTGTGGGCGTAGCT…
B2_B alt	GCGCACGCTGGGAGAACTGCGGATGAGTCTAAAAACTTAGTTAAGGATTACATTAGCTACCGCTTACGCCAGCGTGGGTACGAGTGGGATGCGGGCGATGTCGGAGCTGCTCCACCAGGAGCAGCACCCGCTCCAGGCATTTTTTCGTCCCAGCCTGGCCACACACCTCATCCCGCAGCGTCACGCGACCCTGTCGCTCGCACATCTCCCTTGCAGACTCCTGCGGCACCAGGCGCTGCAGCTGGACCTGCACTGTCCCCCGTCCCACCTAAAGTAGCTAAAACCCTGCGTAAATTAGGAGACGAATTAGAAGAAAAATACCGTGATCAGTTCGATGATATGTGCGACAAATTACATATCACACCAGATACGGCATACCCGACCTTTGTAGGGGTGGCT…
B3_B_alt	GCGCACGCTGGGAGAACTACTACAAATTCTCGTAATCTTGTAGAAGATTATATCAATTATCGCTTGCGCCAGCGCGGATATGAATGGGATGCCGGTGATGTAGGTGCAGCGCCGCCGGGTGCTGCACCGGCTCCCGGGATCTTCAGCTCTCAACCTGGACATACGCCGCACCCTGCAGCAAGTCGCGACCCTGTTGCCCGCACATCACCATTACAGACTCCTGCAGCTCCTGGAGCCGCCGCTGGTCCTGCGTTGAGCCCAGTTCCTCCGAAGGTCTCACGTACTATGCGTGAGTTAGGAGACGAGTTTGAGGAACGTTACCGCGATCAATTCGATGATATGTGTGATCAATTGCACATTACTCCAGACACCGCTTACCCAACATTCACAGCGGTCGCC…
B4_B_alt	GCGCACGCTGGGAGAACTACGTCTAATTCGCGTAACCTTGTCGAGGACTACATCTTTTATAAATTGCGTGAGCGCGGCTACGAATGGGATGCAGGGGATGTTGGCGCCGCCCCCCCTGGGGCCGCCCCAGCTCCAGGAATTTTCTCCTCCCAACCTGGACACACACCTCACCCTGCAGCTAGTCGCGATCCGGTCGCTCGTACGAGTCCGTTACAAACGCCTGCTGCTCCGGGCGCTGCAGCTGGGCCGGCATTGTCGCCTGTTCCACCAAAGGTACATCGCACGATGCGCGAACTGGGAGACGAGTTTGAGGAGCGTTATCGCGAGCAATTTGACGATATGTGTGACCAGTTGCACATTACTCCAGACACAGCATATCCAAAGTTTGCTGGAGTCGCG…
B5_B_alt	GCGCACGCTGGGAGAACTCCGTATAACAGCCGCGAACTTGTCGAAGACTATATCTCGTACAAATTATCGCAACGTGGCTATGAATGGGATGCCGGTGATGTAGGTGCTGCCCCCCCGGGAGCCGCTCCGGCACCTGGAATTTTTAGCAGCCAACCTGGCCACACACCTCATCCGGCGGCGTCGCGTGATCCCGTCGCGCGCACATCGCCATTGCAGACTCCAGCAGCCCCTGGAGCCGCCGCAGGTCCTGCATTAAGCCCTGTTCCGCCGCCTGTGCACCGTGCCATGCGCGAAGCTGGTGATGAATTCGAACGCCGTTACCGCCGCGCCTTTTCTGACTTGAGTGCGCAGTTGCATGTCACTCCCTCTACCGCGTACCAGCGTTTTGCGGAGGTGGTC…
MB1_B_alt_0.4	GCGCACGCTGGGAGAACTGTTGAACAAGCTCGCAACTTGGTGAAGGATTATATCCATTATCGCCTTCGCCAGCGCGGATACGAATGGGATGCCGGCGATGTCGGTGCAGCCCCACCTGGAGCCGCACCTGCGCCGGGAATCTTTTCTAGTCAACCGGGACATACGCCTCATCCTGCGGCAAGTCGCGATCCAGTTGCACGTACCTCTCCGCTTCAAACTCCAGCTGCACCTGGGGCGGCAGCTGGCCCAGCATTATCACCAGTGCCTCCCAAAGTATCAAAGACATTACGCCGTGTAGCCGACGAGTTGGAAGAGAAATATCAGGACCAATTTGACAACATGTGTGATAAATTGCATATCACCCCCGACACAGCGTACCCGACCTTCACTGGTGTAGCG…
MB1_B_alt_0.35	GCGCACGCTGGGAGAACTGTTGAACAAGCTCGCAACTTGGTGAAGGATTATATCCATTATCGCCTTCGCCAGCGCGGATACGAATGGGATGCCGGCGATGTCGGTGCAGCCCCACCTGGAGCCGCACCTGCGCCGGGAATCTTTTCTAGTCAACCGGGACATACGCCTCATCCTGCGGCAAGTCGCGATCCAGTTGCACGTACCTCTCCGCTTCAAACTCCAGCTGCACCTGGGGCGGCAGCTGGCCCAGCATTATCACCAGTGCCTCCCAAAGTAGCAAAGACATTACGCCGTGTAGCCGACGAGTTGGAAGAGAAATATCAGGACCAATTTGACAACATGTGTGATAAATTGCATATCACCCCCGACACAGCGTACCCGACCTTCACTGGTGTAGCG…
MB1_B_alt_0.3	GCGCACGCTGGGAGAACTGTTGAACAGGCACGCAACCTTGTGAAAGACTATATTCACTATCGCCTTCGTCAGCGCGGGTATGAGTGGGACGCCGGGGACGTCGGTGCGGCACCACCAGGAGCGGCGCCTGCACCTGGCATCTTTAGTAGTCAGCCCGGACACACTCCCCACCCGGCTGCATCTCGTGATCCCGTTGCCCGTACGTCTCCGTTACAAACTCCTGCGGCTCCTGGGGCTGCTGCCGGCCCGGCTCTGTCGCCTGTTCCCCCAAAAGTTGCAAAGACATTGCGCCGTATTGCGGACGAATTAGAGGAAAAATATCAGGACCAATTTGACAACATGTGCGATAAACTGCACATTACCCCTGATACCGCATATCCTACTTTCACTGGAGTAGCT…
MB1_B_alt_0.25	GCGCACGCTGGGAGAACTGCCGATCAGGCACGCAACCTTGTGAAAGACTATATTCACTATCGCCTTCGTCAGCGCGGGTATGAGTGGGACGCCGGGGACGTCGGTGCGGCACCACCAGGAGCGGCGCCTGCACCTGGCATCTTTAGTAGTCAGCCCGGACACACTCCCCACCCGGCTGCATCTCGTGATCCCGTTGCCCGTACGTCTCCGTTACAAACTCCTGCGGCTCCTGGGGCTGCTGCCGGCCCGGCTCTGTCGCCTGTTCCCCCAAAAGTTGCAAAGACATTGCGCCGTATTGCGGACGAATTAGAGGAAAAATATCAGGACCAATTTGACAACATGTGCGATAAACTGCACATTACCCCTGATACCGCATATCCTACTTTCACTGGAGTAGCT…
BCL-2- Hydra_magnapapillata	GCGCACGCTGGGAGAACTGAAGATAACTATAAACGCATCGTGAAGTCCTATGTGGGCGAAAAATTACGCCAGCGTGGCTACGAGTGGGATGCCGGGGACGTAGGTGCAGCACCACCAGGGGCAGCACCCGCCCCGGGCATTTTTTCATCTCAACCAGGCCACACTCCCCATCCAGCTGCCTCTCGCGATCCCGTCGCACGCACGAGTCCTCTTCAGACACCCGCCGCTCCGGGAGCGGCAGCTGGACCTGCCTTAAGCCCGGTGCCACCTGAAATCGCAAAAACATTACAGCGTGTGGGGGATGAGCTGGAATCAGCAAACACAGACTTCTTCAAAAATATGTGTGATCAATTGCAGATTACACCCTCAACAGCTTACCCTACTTTTCAAAGCATTGCA…
BCL-2- Saccoglossus_kowalevskii	GCGCACGCTGGGAGAACTAACCTTCACAGTCGTACTCTGGTCGTTGATTACATTTTCTACCGCCTTAACCAGCGTGGCTACGAGTGGGATGCCGGGGACGTAGGTGCAGCACCACCAGGGGCAGCACCCGCCCCGGGCATTTTTTCATCTCAACCAGGCCACACTCCCCATCCAGCTGCCTCTCGCGATCCCGTCGCACGCACGAGTCCTCTTCAGACACCCGCCGCTCCGGGAGCGGCAGCTGGACCTGCCTTAAGCCCGGTGCCACCTAAAGTTAACTTCACCATGCGTGCTTTAGGCGATGAATTTGAAACACGTTACCGTGACGTATTTCAGGGTATGTGTGATCAATTGCACATTACGCCATCTACTGCTTATCCTACATTCACAGCCGTTACG…
BCL-2- Octopus_bimaculoides	GCGCACGCTGGGAGAACTGTTCCAGTCTCGCGCTATCTGCTGGAAGACTATGTTAATTACCGCTTGCGCCAGCGTGGCTACGAGTGGGATGCCGGGGACGTAGGTGCAGCACCACCAGGGGCAGCACCCGCCCCGGGCATTTTTTCATCTCAACCAGGCCACACTCCCCATCCAGCTGCCTCTCGCGATCCCGTCGCACGCACGAGTCCTCTTCAGACACCCGCCGCTCCGGGAGCGGCAGCTGGACCTGCCTTAAGCCCGGTGCCACCTAAGGTAGCAATCAGCATGCGTGCTATGGCGGATGAGTTCGAGGAGCGCTACCATGATCAGTTCTCGAATATGTGTCAACAGTTGCACATCACACAACACACAGCCTACTGTACCTTTCAGGCCGTCATC…
BCL-2-Branchiostoma belcheri	GCGCACGCTGGGAGAACTACCTCAGATTCTCGCTCTATCGTAACTGACTACGTCTTTTATAAGCTGAACCAGCGTGGCTACGAGTGGGATGCCGGGGACGTAGGTGCAGCACCACCAGGGGCAGCACCCGCCCCGGGCATTTTTTCATCTCAACCAGGCCACACTCCCCATCCAGCTGCCTCTCGCGATCCCGTCGCACGCACGAGTCCTCTTCAGACACCCGCCGCTCCGGGAGCGGCAGCTGGACCTGCCTTAAGCCCGGTGCCACCTGATGCTCATCGTCTGATGCGCGAACTGGGTGATAAATTTGAGGAGCGCTATCGTGAACAGTTTGACGAGATGGGTGATCAATTACATTTAACCCCTGATACCGCTTACCAAAAGTATCATAACGTGGTG…
BCL-2-Trichoplax_adhaerens	GCGCACGCTGGGAGAACTTTTCTTGTATACAAGAATATTATTAAAGACTACATCCAGTCCCGTCTGCTTCAACGCGGTTATGAGTGGGATGCAGGCGATGTCGGTGCGGCACCTCCTGGAGCCGCTCCGGCCCCCGGCATCTTCTCTTCACAGCCCGGGCATACTCCTCACCCGGCTGCCTCACGTGACCCAGTAGCACGTACTTCCCCCCTTCAGACGCCAGCAGCTCCCGGAGCTGCGGCAGGACCGGCACTGTCCCCGGTACCCCCGAAAGTCAGTGAGCGCTTGAAGGAAGTTGGCAATGAACTTGAGGGTAAGTTTAAAGACTCTTTCTCGAACATGTGTGAGCGTTTAACTATCACTGACACTACAGCCTATCCAACGTTCGTAGGCGTTGTT…
BCL-2-Stegodyphus_mimosarum	GCGCACGCTGGGAGAACTAATGAAACGGTAGCAACATTTGTTTACCAATACCTTGACCACAAAGTATCTCAACGTGGATACGAGTGGGACGCTGGAGATGTTGGAGCAGCGCCCCCTGGAGCAGCCCCGGCACCTGGCATCTTCTCGTCTCAACCGGGTCATACCCCCCATCCGGCGGCCTCACGTGACCCTGTAGCTCGTACTTCTCCGTTGCAAACGCCCGCCGCACCAGGCGCAGCTGCTGGGCCAGCTCTGTCCCCGGTGCCTCCCAAGGTAGGGAAAGCGCTTAAGTGTTTGGCCGACGAATTTGCTGCTCAGTTCAAGCAACAATTTGTAGACATGTGCGAATCGCTGGATGTACGTGAGGAAACAATCAAGTGTACGGTCGAGGGGGTAGCC…
B1-3	GCGCACGCTGGGAGAACTGGGTACGACAACCGCGAGATTGTGATGAAATATATCCACTACAAGCTTTCTCAGCGTGGCTACGAGTGGGATGCCGGGGACGTAGGTGCAGCACCACCAGGGGCAGCACCCGCCCCGGGCATTTTTTCATCTCAACCAGGCCACACTCCCCATCCAGCTGCCTCTCGCGATCCCGTCGCACGCACGAGTCCTCTTCAGACACCCGCCGCTCCGGGAGCGGCAGCTGGACCTGCCTTAAGCCCGGTGCCACCTGTGGTCCACCTGACCCTCCGCCAGGCCGGCGACGACTTCTCCCGCCGCTACctcCGCGACTTCGCCGAGATGTCCAGCCAGCTGCACCTGACGCCCTTCACCGCGCGGGGACGCTTTGCCACGGTGGTG…
B2-1	GCGCACGCTGGGAGAACTGGGTACGACAACCGCGAGATTGTGATGAAATATATCCACTACAAGCTTTCTCAGCGTGGCcacGAGTGGGATGCCGGGGACGTAGGTGCAGCACCACCAGGGGCAGCACCCGCCCCGGGCATTTTTTCATCTCAACCAGGCCACACTCCCCATCCAGCTGCCTCTCGCGATCCCGTCGCACGCACGAGTCCTCTTCAGACACCCGCCGCTCCGGGAGCGGCAGCTGGACCTGCCTTAAGCCCGGTGCCACCTGTGGTCCACCTGACCCTCCGCCAGGCCGGCGACGACTTCTCCCGCCGCTACctcCGCGACTTCGCCGAGATGTCCAGCCAGCTGCACCTGACGCCCTTCACCGCGCGGGGACGCTTTGCCACGGTGGTG…
B3-1	GCGCACGCTGGGAGAACTGGGTACGACAACCGCGAGATTGTGATGAAATATATCCACTACAAGCTTTCTCAGCGTGGCTACGAGTGGGATGCCGGGGACGTAGGTGCAGCACCACCAGGGGCAGCACCCGCCCCGGGCATTTTTccaTCTCAACCAGGCCACACTCCCCATCCAGCTGCCTCTCGCGATCCCGTCGCACGCACGAGTCCTCTTCAGACACCCGCCGCTCCGGGAGCGGCAGCTGGACCTGCCTTAAGCCCGGTGCCACCTGTGGTCCACCTGACCCTCCGCCAGGCCGGCGACggcTTCTCCCGCCGCTACCGCCGCGACTTCGCCGAGATGTCCAGCCAGCTGCACCTGACGCCCTTCACCGCGCGGGGACGCTTTGCCACGGTGGTG…
B4-2	GCGCACGCTGGGAGAACTGGGTACGACAACCGCGAGATTGTGATGAAATATATCCACTACAAGCTTTCTCAGCGTGGCTACGAGTGGGATGCCGGGGACGTAGGTGCAGCACCACCAGGGGCAGCACCCGCCCCGGGCATTTTTTCATCTCAACCAGGCCACACTCCCCATCCAGCTGCCTCTCGCGATCCCGTCGCACGCACGAGTCCTCTTCAGACACCCGCCGCTCCGGGAGCGGCAGCTGGACCTGCCTTAAGCCCGGTGCCACCTGTGGTCCACCTGACCCTCCGCCAGGCCGGCGACGACTTCTCCCGCCGCTACctcCGCGACTTCgacGAGATGttcAGCCAGCTGCACCTGACGCCCTTCACCGCGCGGGGACGCTTTGCCACGGTGGTG…
L1-1	GAAGCCCCGGCCGCTGACGCCATCATGTCGCCCGAAGAGGAGCTGGACGGGTACGAGCCGGAGCCTCTCGGGAAGCGGCCGGCTGTCCTGCCGCTGCTGGAGTTGGTCGGGGAATCTGGTAATAACACCAGTACGGACGGGTCACTACCCTCGACGCCGCCGCCAGCAGAGGAGGAGGAGGACGAGTTGTACCGGCAGTCGCTGGAGATTATCTCTCGGTACCTTCGGGAGCAGGCCACCGGCGCCAAGGACACAAAGCCAATGGGCAGGTCTGGGGCCACCAGCAGGAAGGCGCTGGAGACCTTACGACGGGTTGGGGATGGCGTGCAGCGCAACCACGAGACGgccTTCCAAGGCATGCTTCGGAAACTGGACATCAAAAACGAAGACGATGTGAAA…
L3-3	GAAGCCCCGGCCGCTGACGCCATCATGTCGCCCGAAGAGGAGCTGGACGGGTACGAGCCGGAGCCTCTCGGGAAGCGGCCGGCTGTCCTGCCGCTGCTGGAGTTGGTCGGGGAATCTGGTAATAACACCAGTACGGACGGGTCACTACCCTCGACGCCGCCGCCAGCAGAGGAGGAGGAGGACGAGTTGTACCGGCAGTCGCTGGAGATTATCTCTCGGTACCTTCGGGAGCAGGCCACCGGCGCCAAGGACACAAAGCCAATGGGCAGGTCTGGGGCCACCAGCAGGAAGGCGCTGGAGACCTTACGACGGGTTGGGGATGGCGTGCAGCGCAACCACGAGACGACCTTCCAAGGCATGCTTCGGAAACTGGACATCAAAAACGAAGACGATGTGAAA…
L4-3	GAAGCCCCGGCCGCTGACGCCATCATGTCGCCCGAAGAGGAGCTGGACGGGTACGAGCCGGAGCCTCTCGGGAAGCGGCCGGCTGTCCTGCCGCTGCTGGAGTTGGTCGGGGAATCTGGTAATAACACCAGTACGGACGGGTCACTACCCTCGACGCCGCCGCCAGCAGAGGAGGAGGAGGACGAGTTGTACCGGCAGTCGCTGGAGATTATCTCTCGGTACCTTCGGGAGCAGGCCACCGGCGCCAAGGACACAAAGCCAATGGGCAGGTCTGGGGCCACCAGCAGGAAGGCGCTGGAGACCTTACGACGGGTTGGGGATGGCGTGCAGCGCAACCACGAGACGACCTTCCAAGGCATGCTTCGGAAACTGGACATCAAAAACGAAGACGATGTGAAA…
L3-1	GAAGCCCCGGCCGCTGACGCCATCATGTCGCCCGAAGAGGAGCTGGACGGGTACGAGCCGGAGCCTCTCGGGAAGCGGCCGGCTGTCCTGCCGCTGCTGGAGTTGGTCGGGGAATCTGGTAATAACACCAGTACGGACGGGTCACTACCCTCGACGCCGCCGCCAGCAGAGGAGGAGGAGGACGAGTTGTACCGGCAGTCGCTGGAGATTATCTCTCGGTACCTTCGGGAGCAGGCCACCGGCGCCAAGGACACAAAGCCAATGGGCAGGTCTGGGGCCACCAGCAGGAAGGCGCTGGAGACCTTACGACGGGTTGGGGATGGCGTGCAGCGCAACCACGAGACGgccTTCCAAGGCATGCTTCGGAAACTGGACATCAAAAACGAAGACGATGTGAAA…

## Sheet: Amino Acid Sequences
Protein	Sequence
hsBCL-2	AHAGRTGYDNREIVMKYIHYKLSQRGYEWDAGDVGAAPPGAAPAPGIFSSQPGHTPHPAASRDPVARTSPLQTPAAPGAAAGPALSPVPPVVHLTLRQAGDDFSRRYRRDFAEMSSQLHLTPFTARGRFATVVEELFRDGVNWGRIVAFFEFGGVMCVESVNREMSPLVDNIALWMTEYLNRHLHTWIQDNGGWDAFVELYGPSMRPLFDFSWLSLK*
hsMCL-1	EAPAADAIMSPEEELDGYEPEPLGKRPAVLPLLELVGESGNNTSTDGSLPSTPPPAEEEEDELYRQSLEIISRYLREQATGAKDTKPMGRSGATSRKALETLRRVGDGVQRNHETAFQGMLRKLDIKNEDDVKSLSRVMIHVFSDGVTNWGRIVTLISFGAFVAKHLKTINQESCIEPLAESITDVLVRTKRDWLVKQRGWDGFVEFFHVEDLEGGIR*
AncBCL-O	AHAGRTPYDNREIVVKYIHYKLSQRGYEWDAGDVGAAPPGAAPAPGIFSSQPGHTPHPAASRDPVARTSPLQTPAAPGAAAGPALSPVPPAVHRTLREAGDEFSRRYQRDFAEMSGQLHLTPSTARGRFAAVVEELFRDGVNWGRIVAFFEFGGTMCVESVNREMSPLVDNIANWMTEYLNGHLQNWIQENGGWDAFVELYGPSMRPLFDFSWLSLK*
AncBCL-G	AHAGRTPYDSRELVVDYIHYKLSQRGYEWDAGDVGAAPPGAAPAPGIFSSQPGHTPHPAASRDPVARTSPLQTPAAPGAAAGPALSPVPPAVHRALREAGDEFERRYQRDFADMSSQLHLTPSTARGRFAAVAEELFRDGVNWGRIVAFFAFGGTLCVESVNREMSPLVDNIANWMTAYLDSNLQNWIQENGGWDAFVELYGPSMRPLFDFSWLSLK*
AncB5	AHAGRTPYDSRELVEDYIHYKLSQRGYEWDAGDVGAAPPGAAPAPGIFSSQPGHTPHPAASRDPVARTSPLQTPAAPGAAAGPALSPVPPPVHRAMREAGDEFERRYRRAFADMSSQLHITPGTAYQRFAEVADELFRDGVNWGRIVAFFAFGGALCVECVDKEMPPLVDNIADWMTTYLDNNLQDWIQENGGWDAFVELYGPSMRPLFDFSWLSLK*
AncB4	AHAGRTASDSRNLVEDYIHYKLSQRGYEWDAGDVGAAPPGAAPAPGIFSSQPGHTPHPAASRDPVARTSPLQTPAAPGAAAGPALSPVPPKVHRTMRELGDEFEERYRDQFDDMSDQLHITPNTAYQTFTGVANELFRDGVNWGRIVALFAFGGALAVQCVEKEMPQLVDNIVDWVTTYIDNNLSQWIQENGGWDGFVEFYEPSMRPLFDFSWLSLK*
AncB3	AHAGRTASDSRNLVEDYIHYRLRQRGYEWDAGDVGAAPPGAAPAPGIFSSQPGHTPHPAASRDPVARTSPLQTPAAPGAAAGPALSPVPPKVHRTMRALGDEFEERYRDQFDDMCDQLHITPNTAYPTFTGVANELFRDGINWGRIVALFAFGGALAVQCVEKEMPQLVDNIVDWVTKYIDNNLSQWINENGGWDGFVEFYEPSMRPLFDFSWLSLK*
AncB2	AHAGRTVEQSRNLVKDYIHYRLRQRGYEWDAGDVGAAPPGAAPAPGIFSSQPGHTPHPAASRDPVARTSPLQTPAAPGAAAGPALSPVPPKVSRTLRRVADELEEKYQDQFDNMCDQLHITPNTAYPTFTGVANELFRDGINWGRIVALFAFGGALAVHCVEKDMPELVDNIVDWVAKYIDNNLSQWIKENGGWDGFVEFFEPSMRPLFDFSWLSLK*
AncB1	AHAGRTVEQSRNLVKDYIHYRLRQRGYEWDAGDVGAAPPGAAPAPGIFSSQPGHTPHPAASRDPVARTSPLQTPAAPGAAAGPALSPVPPKVSRTLRKVADELEEKYQDQFDNMCDKLHITPDTAYPTFTGVANELFRDGINWGRIVALFAFGGALAVHCVEKGMPEFVDNIVDWVAKYIDNNLSEWIKENGGWDGFVEHFNPSMRPLFDFSWLSLK*
AncMB1_B	AHAGRTVEQAKNLVKDYIHYRLRQRGYEWDAGDVGAAPPGAAPAPGIFSSQPGHTPHPAASRDPVARTSPLQTPAAPGAAAGPALSPVPPKVSRTLRKVADELEEKYQDQFDNMCDKLHITPDTAYPTFTGVAKELFRDGINWGRIVALFAFGGALAVHCVKKGMPDFVENIVDWVAKFIDNNLSEWIKEHGGWDGFVEHFNPSMRPLFDFSWLSLK*
AncMB1_M	EAPAADAIMSPEEELDGYEPEPLGKRPAVLPLLELVGESGNNTSTDGSLPSTPPPAEEEEEEIVEQAKNLVKDYIHYRLRGAKDTKPMGRSGATSRKVSRTLRKVADELEEKYQDQFDNMCDKLHITPDTAYPTFTGVAKELFRDGVINWGRIVALFAFGGALAVHCVKKGMPDFVENIVDWVAKFIDNNLSEWIKEHGGWDGFVEHFNVEDLEGGIR*
AncM1	EAPAADAIMSPEEELDGYEPEPLGKRPAVLPLLELVGESGNNTSTDGSLPSTPPPAEEEEEEIAQQAKNLAKDYIHYRLGGAKDTKPMGRSGATSRKTAKTLRRVADELEEKHQVPFNNMCNKLNITPDTAYETFVNVADEMFRDGVINWGRIVALYAFGGKLAVHCREKGMPDFVENIADWVAKYVGNKLSEWIKKHGGWDGFVEHFKVEDLEGGIR*
AncM2	EAPAADAIMSPEEELDGYEPEPLGKRPAVLPLLELVGESGNNTSTDGSLPSTPPPAEEEEEEIAQEAKDLAKDYIHYKLGGAKDTKPMGRSGATSRKTAKTLRRVADELLEKHQISFNGMVNKLNISPDTAYETFVNVADEMFEDGVINWGRIVALYAFGGRLAVHCREKGMPDFVENIADYVGKYVGNKLSEWIKKHGGWDGFVEHFKVEDLEGGIR*
AncM3	EAPAADAIMSPEEELDGYEPEPLGKRPAVLPLLELVGESGNNTSTDGSLPSTPPPAEEEEEEIRQEAKDLAKDYIHYKLGGAKDTKPMGRSGATSRKTAKTLRRVADELLEKHQISFNGMVNKLNISPDTAYETFTNVADEMFEDGVINWGRIVALYAFGGRLAMHCREQGTPDFVENIADYVGKYVGSKLSEWIKKHGGWDGFNEHFKVEDLEGGIR*
AncM4	EAPAADAIMSPEEELDGYEPEPLGKRPAVLPLLELVGESGNNTSTDGSLPSTPPPAEEEEDEIRQEAHELARDYIHYKLGGAKDTKPMGRSGATSRKAAKTLRRVGDELIEKHQIAFNGMVNKLNISPDTDDETFTNVANEMFEDGVMNWGRIVSLFAFGGVLAMHCKEQGTGDSVENIADYVGKYIGTKKSEWIEKNGGWDGFVQFFNVEDLEGGIR*
AncM6	EAPAADAIMSPEEELDGYEPEPLGKRPAVLPLLELVGESGNNTSTDGSLPSTPPPAEEEEDSIRREAHELARDYLRYHLGGAKDTKPMGRSGATSRKAAETLRRVGDELIEKHQIAFNGMVNKLNISSEEDLETISNVANEMFSDGVMNWGRIVSLFAFGGVLAKHLKEQGTGDSIENIADYVANYLGTQKREWIEKNGGWDGFVKFFHVEDLEGGIR*
M6_M_alt	EAPAADAIMSPEEELDGYEPEPLGKRPAVLPLLELVGESGNNTSTDGSLPSTPPPAEEEEESVKRQAHQLVKDYIRHRVHGAKDTKPMGRSGATSRRTAETLRRVGDELVDKHQVAFNGMVNRLNVSNDEDLESISNVADEMFSDGVMNWGRIVSLFAFGGVLARHLRDKGTEESVDNVAEYVAKYIVTEKRDWIQKHGGWEGFIQFFHVEDLEGGIR*
MB1_M_alt_0.2	EAPAADAIMSPEEELDGYEPEPLGKRPAVLPLLELVGESGNNTSTDGSLPSTPPPAEEEDEDIADQARNLVKDYIHYRLRGAKDTKPMGRSGATSRKVAKTLRRIADELEEKYQEQFDDMCDKLHITPDTAYPTFVGVANELFSDGVINWGRIVALFAFGGALAVHCVEKGMPELVDNIVDWVAKYIDDNLSEWIQEHGGWDGFVEHFKVEDLEGGIR*
MB1_B_alt_0.2	AHAGRTADQARNLVKDYIHYRLRQRGYEWDAGDVGAAPPGAAPAPGIFSSQPGHTPHPAASRDPVARTSPLQTPAAPGAAAGPALSPVPPKVAKTLRRIADELEEKYQEQFDDMCDKLHITPDTAYPTFVGVANELFSDGINWGRIVALFAFGGALAVHCVEKGMPELVDNIVDWVAKYIDDNLSEWIQEHGGWDGFVEHFKPSMRPLFDFSWLSLK*
B1_B_alt	AHAGRTADESKNLVKDYISYRLRQRGYEWDAGDVGAAPPGAAPAPGIFSSQPGHTPHPAASRDPVARTSPLQTPAAPGAAAGPALSPVPPKVAKTLRRIGDELEEKYRDQFDNMCDQLHITPNTAYPTFVGVANELFSDGINWGRIVALFAFGGALAVHCVKKGMPDLVENIVDWVAKYIDDNLSQWIQEHGGWDGFVEHFKPSMRPLFDFSWLSLK*
B2_B alt	AHAGRTADESKNLVKDYISYRLRQRGYEWDAGDVGAAPPGAAPAPGIFSSQPGHTPHPAASRDPVARTSPLQTPAAPGAAAGPALSPVPPKVAKTLRKLGDELEEKYRDQFDDMCDKLHITPDTAYPTFVGVANELFSDGINWGRIVALFAFGGALAVHCVEKEMPDFVENIVDWIAKYIDDNLSEWINENGGWDGFVEHFNPSMRPLFDFSWLSLK*
B3_B_alt	AHAGRTTTNSRNLVEDYINYRLRQRGYEWDAGDVGAAPPGAAPAPGIFSSQPGHTPHPAASRDPVARTSPLQTPAAPGAAAGPALSPVPPKVSRTMRELGDEFEERYRDQFDDMCDQLHITPDTAYPTFTAVANELFSDGINWGRIVALFAFGGALAVHCVEKDMPQLVDNIVDWITTYIDNNLSQWIQENGGWDGFVEFYEPSMRPLFDFSWLSLK*
B4_B_alt	AHAGRTTSNSRNLVEDYIFYKLRERGYEWDAGDVGAAPPGAAPAPGIFSSQPGHTPHPAASRDPVARTSPLQTPAAPGAAAGPALSPVPPKVHRTMRELGDEFEERYREQFDDMCDQLHITPDTAYPKFAGVANELFRDGINWGRIVALFAFGGALAVHCVEKDMPQLVDNIVDWITQYIDNNLSQWIQENGGWDGFVEFYEPSMRPLFDFSWLSLK*
B5_B_alt	AHAGRTPYNSRELVEDYISYKLSQRGYEWDAGDVGAAPPGAAPAPGIFSSQPGHTPHPAASRDPVARTSPLQTPAAPGAAAGPALSPVPPPVHRAMREAGDEFERRYRRAFSDLSAQLHVTPSTAYQRFAEVVDELFRDGVNWGRIVAFFAFGGALCVECVDKEMSPLVDNIADWMTTYLDNNLQNWIQENGGWDAFVELYGPSMRPLFDFSWLSLK*
MB1_B_alt_0.4	AHAGRTVEQARNLVKDYIHYRLRQRGYEWDAGDVGAAPPGAAPAPGIFSSQPGHTPHPAASRDPVARTSPLQTPAAPGAAAGPALSPVPPKVSKTLRRVADELEEKYQDQFDNMCDKLHITPDTAYPTFTGVAKELFRDGINWGRIVALFAFGGALAVHCVKKGMPDFVENIVDWVAKFIDNNLSEWIKEHGGWDGFVEHFNPSMRPLFDFSWLSLK*
MB1_B_alt_0.35	AHAGRTVEQARNLVKDYIHYRLRQRGYEWDAGDVGAAPPGAAPAPGIFSSQPGHTPHPAASRDPVARTSPLQTPAAPGAAAGPALSPVPPKVAKTLRRVADELEEKYQDQFDNMCDKLHITPDTAYPTFTGVANELFRDGINWGRIVALFAFGGALAVHCVEKGMPDLVENIVDWVAKFIDNNLSEWIKEHGGWDGFVEHFNPSMRPLFDFSWLSLK*
MB1_B_alt_0.3	AHAGRTVEQARNLVKDYIHYRLRQRGYEWDAGDVGAAPPGAAPAPGIFSSQPGHTPHPAASRDPVARTSPLQTPAAPGAAAGPALSPVPPKVAKTLRRIADELEEKYQDQFDNMCDKLHITPDTAYPTFTGVANELFSDGINWGRIVALFAFGGALAVHCVEKGMPDLVDNIVDWVAKYIDDNLSEWIKEHGGWDGFVEHFKPSMRPLFDFSWLSLK*
MB1_B_alt_0.25	AHAGRTADQARNLVKDYIHYRLRQRGYEWDAGDVGAAPPGAAPAPGIFSSQPGHTPHPAASRDPVARTSPLQTPAAPGAAAGPALSPVPPKVAKTLRRIADELEEKYQDQFDNMCDKLHITPDTAYPTFTGVANELFSDGINWGRIVALFAFGGALAVHCVEKGMPELVDNIVDWVAKYIDDNLSEWIQEHGGWDGFVEHFKPSMRPLFDFSWLSLK*
BCL-2- Hydra_magnapapillata	AHAGRTEDNYKRIVKSYVGEKLRQRGYEWDAGDVGAAPPGAAPAPGIFSSQPGHTPHPAASRDPVARTSPLQTPAAPGAAAGPALSPVPPEIAKTLQRVGDELESANTDFFKNMCDQLQITPSTAYPTFQSIADEIFVSGKNWGRVVAFLTFGGNFAVHCALRADMGEEYVDRVVNWISKYMAVNLDYWINQQGGWDGFLIFFEPSMRPLFDFSWLSLK*
BCL-2- Saccoglossus_kowalevskii	AHAGRTNLHSRTLVVDYIFYRLNQRGYEWDAGDVGAAPPGAAPAPGIFSSQPGHTPHPAASRDPVARTSPLQTPAAPGAAAGPALSPVPPKVNFTMRALGDEFETRYRDVFQGMCDQLHITPSTAYPTFTAVTNELFTEGITWGRVVAMYAFGGALAVQCVDREMAQYVDRVVDWITQYTDNNLSQWISENGGWNGLVHFYEPSMRPLFDFSWLSLK*
BCL-2- Octopus_bimaculoides	AHAGRTVPVSRYLLEDYVNYRLRQRGYEWDAGDVGAAPPGAAPAPGIFSSQPGHTPHPAASRDPVARTSPLQTPAAPGAAAGPALSPVPPKVAISMRAMADEFEERYHDQFSNMCQQLHITQHTAYCTFQAVINELFSDQTINWGRIVALFSFSGALSLQSVEKEMPYLVDNIVEWAHTYLTDNLNTWINAHGGWDGFVEFYEPSMRPLFDFSWLSLK*
BCL-2-Branchiostoma belcheri	AHAGRTTSDSRSIVTDYVFYKLNQRGYEWDAGDVGAAPPGAAPAPGIFSSQPGHTPHPAASRDPVARTSPLQTPAAPGAAAGPALSPVPPDAHRLMRELGDKFEERYREQFDEMGDQLHLTPDTAYQKYHNVVAELFREGVRWGRLVALVAFTGACTVVAVEREMPQFVDRYVDWTVQYIDNNLAQWLQENGGWEGFEDFARPSMRPLFDFSWLSLK*
BCL-2- Trichoplax_adhaerens	AHAGRTFLVYKNIIKDYIQSRLLQRGYEWDAGDVGAAPPGAAPAPGIFSSQPGHTPHPAASRDPVARTSPLQTPAAPGAAAGPALSPVPPKVSERLKEVGNELEGKFKDSFSNMCERLTITDTTAYPTFVGVVNELFSTGINWGRIVAFIVFSSRLAIHFKRNGMPEYVKSVYGWVARYMHTKLSTWIEANRSWDGFLDHFDPSMRPLFDFSWLSLK*
BCL-2-Stegodyphus_mimosarum	AHAGRTNETVATFVYQYLDHKVSQRGYEWDAGDVGAAPPGAAPAPGIFSSQPGHTPHPAASRDPVARTSPLQTPAAPGAAAGPALSPVPPKVGKALKCLADEFAAQFKQQFVDMCESLDVREETIKCTVEGVANELFSEGVKWSRIVAFFVFGGELAVHCAKQSMPQLIDNIAYSVAAYITEQLLPWINDNGGWEGLIAFNSPSMRPLFDFSWLSLK*
B1-3	AHAGRTGYDNREIVMKYIHYKLSQRGYEWDAGDVGAAPPGAAPAPGIFSSQPGHTPHPAASRDPVARTSPLQTPAAPGAAAGPALSPVPPVVHLTLRQAGDDFSRRYLRDFAEMSSQLHLTPFTARGRFATVVEELFRDGVNWGRIVAFFEFGGVMCVESVNREMSPLVDNIALWMTEYLNRHLHTWIQDNGGWDAFVELYGPQHAASV*FLLAVSE
B2-1	AHAGRTGYDNREIVMKYIHYKLSQRGHEWDAGDVGAAPPGAAPAPGIFSSQPGHTPHPAASRDPVARTSPLQTPAAPGAAAGPALSPVPPVVHLTLRQAGDDFSRRYLRDFAEMSSQLHLTPFTARGRFATVVEELFRDGVNWGRIVAFFEFGGVMCVESVNREMSPLVDNIALWMTEYLNRHLHTWIQDNGGWDAFVELYGPSMRPLFDFS*LSLK
B3-1	AHAGRTGYDNREIVMKYIHYKLSQRGYEWDAGDVGAAPPGAAPAPGIFPSQPGHTPHPAASRDPVARTSPLQTPAAPGAAAGPALSPVPPVVHLTLRQAGDGFSRRYRRDFAEMSSQLHLTPFTARGRFATVVEELFRDGVNWGRIVAFFEFGGVMCVESVNREMSPLVDNIALWMTEYLNRHLHTWIQDNGGWDAFVELYGPIMRPLFDFS*LSLK
B4-2	AHAGRTGYDNREIVMKYIHYKLSQRGYEWDAGDVGAAPPGAAPAPGIFSSQPGHTPHPAASRDPVARTSPLQTPAAPGAAAGPALSPVPPVVHLTLRQAGDDFSRRYLRDFDEMFSQLHLTPFTARGRFATVVEELFRDGVNWGRIVAFFEFGGVMCVESVNREMSPLVDNIALWMTEYLNRHLHTWIQDNGGWDAFVELYGPQHAASV*FLLAVSE
L1-1	EAPAADAIMSPEEELDGYEPEPLGKRPAVLPLLELVGESGNNTSTDGSLPSTPPPAEEEEDELYRQSLEIISRYLREQATGAKDTKPMGRSGATSRKALETLRRVGDGVQRNHETAFQGMLRKLDIKNEDDVKSLSRGMIHVFSDGVTSWGRIVTLISFGAFVAKHLKTINQESCIEPLAESITDVLVRTKRDWLVKQRGWDGFVEVFHVEDLEGGIR*
L3-1	EAPAADAIMSPEEELDGYEPEPLGKRPAVLPLLELVGESGNNTSTDGSLPSTPPPAEEEEDELYRQSLEIISRYLREQATGAKDTKPMGRSGATSRKALETLRRVGDGVQRNHETAFQGMLRKLDIKNEDDVKSLSRGMIHVFSDGVTNWNRIVTLISFGAFVAKHLKTINQESCIEPLAESITDVLVRTKRDWLVKQRGWDGFVEFFHVEALEGGIR*
L3-3	EAPAADAIMSPEEELDGYEPEPLGKRPAVLPLLELVGESGNNTSTDGSLPSTPPPAEEEEDELYRQSLEIISRYLREQATGAKDTKPMGRSGATSRKALETLRRVGDGVQRNHETTFQGMLRKLDIKNEDDVKSLSRGMIHVFSDGVTNWSRIVTLISFGAFVAKHLKTINQESCIEPLAESITDVLVRTKRDWLVKQRGWDGFVEFFHVEDLEGGIR*
L4-3	EAPAADAIMSPEEELDGYEPEPLGKRPAVLPLLELVGESGNNTSTDGSLPSTPPPAEEEEDELYRQSLEIISRYLREQATGAKDTKPMGRSGATSRKALETLRRVGDGVQRNHETTFQGMLRKLDIKNEDDVKSLSRGMIHVFSDGVTNWGRIVTLISFGAFVAKHLKTINQESCIEPLAESITDVLVRTKRDWLVKQRGWDGFVSSSM*RT*KVASG
BID	MSQEDIIRNIARHLAQVGDSMDRSIPPG
NOXA	MPGKKARKNAQPSPARAPAELEVECATQLRRFGDKLNFRQKLL
NOXA used in FP	AELEVECATQLRRFGDKLNFRQKLL
